# Supplementary material
Source: PubMed Central journal article supplement (PMC2657878)
Supplement: NIHMS94514-supplement-1_si_001.pdf [file NIHMS94514-supplement-1_si_001.pdf]

## Natural Products Chemistry and Taxonomy of the Marine Cyanobacterium

### *Blennothrix cantharidosumum*

Benjamin R. Clark,<sup>†</sup> Niclas Engene,<sup>†</sup> Margaret E. Teasdale,<sup>‡</sup> David C. Rowley,<sup>‡</sup> Teatulohi

Matainaho,<sup>§</sup> Frederick A. Valeriote,<sup>⊥</sup> and William H. Gerwick<sup>†,||,\*</sup>

*Scripps Institution of Oceanography, University of California San Diego, 9500 Gilman Drive, La*

*Jolla, CA 92093-0212, Department of Biomedical and Pharmaceutical Sciences, College of*

*Pharmacy, University of Rhode Island, Kingston, RI 02881, Discipline of Pharmacology,*

*School of Medicine and Health Sciences, University of Papua New Guinea, National Capital*

*District, Papua New Guinea, Henry Ford Health System, Detroit, Michigan 48202 and Skaggs*

*School of Pharmacy and Pharmaceutical Sciences, University of California San Diego, 9500*

*Gilman Drive, La Jolla, CA 92093-0212*

#### Supporting Information:

- 1) <sup>1</sup>H NMR spectrum of tumonoic acid D
- 2) <sup>13</sup>C NMR spectrum of tumonoic acid D
- 3) gCOSY spectrum of tumonoic acid D
- 4) gHSQC spectrum of tumonoic acid D
- 5) gHMBC spectrum of tumonoic acid D
- 6) <sup>1</sup>H NMR spectrum of tumonoic acid E
- 7) <sup>13</sup>C NMR spectrum of tumonoic acid E
- 8) gCOSY spectrum of tumonoic acid E
- 9) gHSQC spectrum of tumonoic acid E

- 10) gHMBC spectrum of tumonoic acid E
- 11) <sup>1</sup>H NMR spectrum of tumonoic acid F
- 12) <sup>13</sup>C NMR spectrum of tumonoic acid F
- 13) gCOSY spectrum of tumonoic acid F
- 14) gHSQC spectrum of tumonoic acid F
- 15) gHMBC spectrum of tumonoic acid F
- 16) <sup>1</sup>H NMR spectrum of tumonoic acid G
- 17) <sup>13</sup>C NMR spectrum of tumonoic acid G
- 18) gCOSY spectrum of tumonoic acid G
- 19) gHSQC spectrum of tumonoic acid G
- 20) gHMBC spectrum of tumonoic acid G
- 21) <sup>1</sup>H NMR spectrum of tumonoic acid H
- 22) <sup>13</sup>C NMR spectrum of tumonoic acid H
- 23) gCOSY spectrum of tumonoic acid H
- 24) gHSQC spectrum of tumonoic acid H
- 25) gHMBC spectrum of tumonoic acid H
- 26) <sup>1</sup>H NMR spectrum of tumonoic acid I
- 27) <sup>13</sup>C NMR spectrum of tumonoic acid I
- 28) gCOSY spectrum of tumonoic acid I
- 29) gHSQC spectrum of tumonoic acid I
- 30) gHMBC spectrum of tumonoic acid I
- 31) (ML)-phylogenetic tree including the full 1414-nucleotide sequence
- 32) (ML)-phylogenetic tree composed of the partial 599-nucleotide sequence

Tumonoic acid D  
1H NMR (CDCl3, 500 MHz)

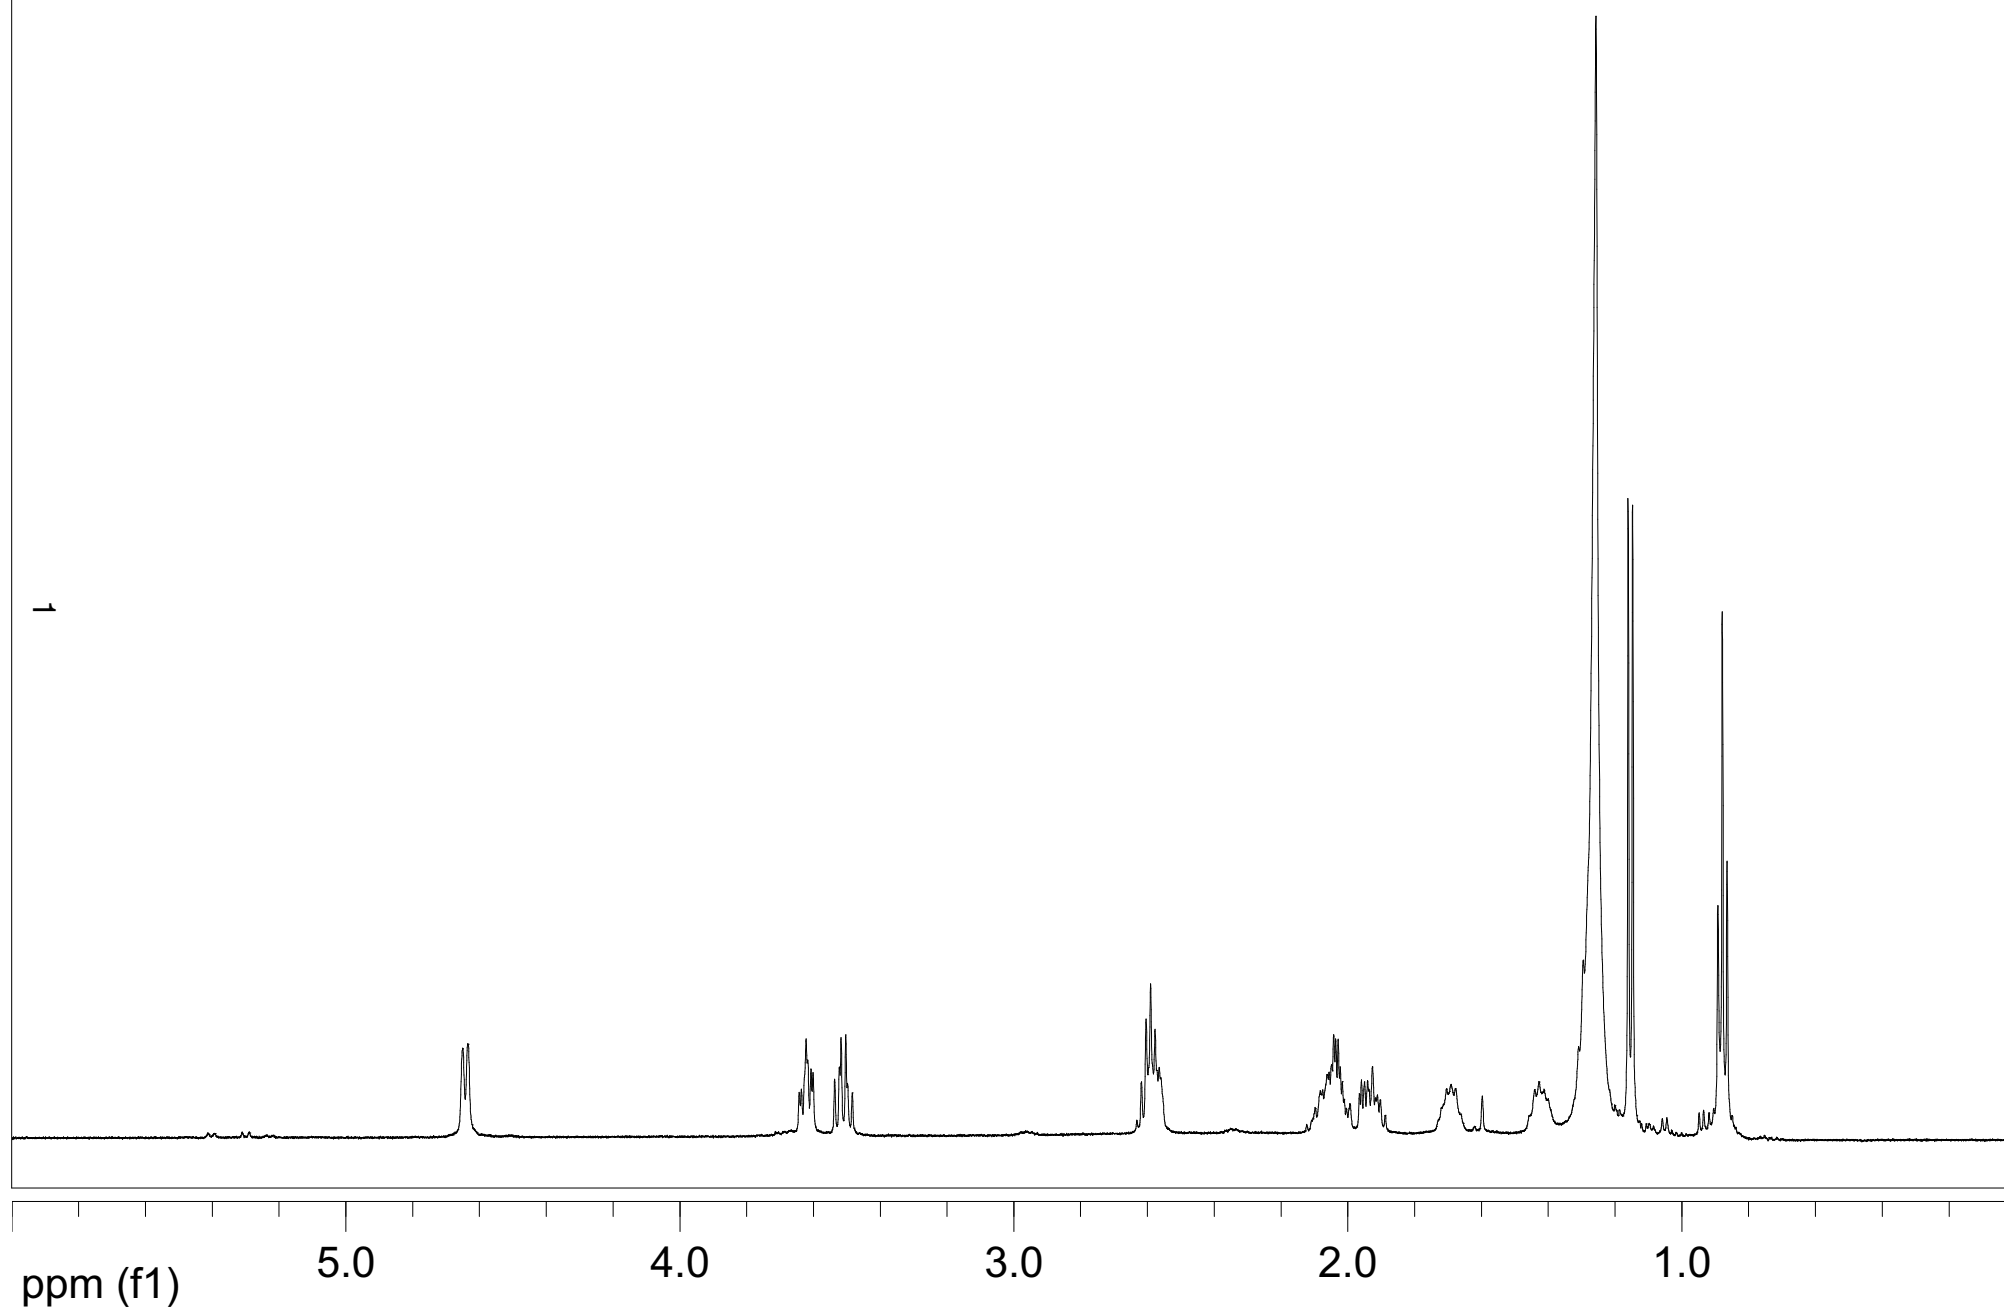

**Tumonoic acid D**  
**<sup>13</sup>C NMR (CDCl<sub>3</sub>, 75 MHz)**

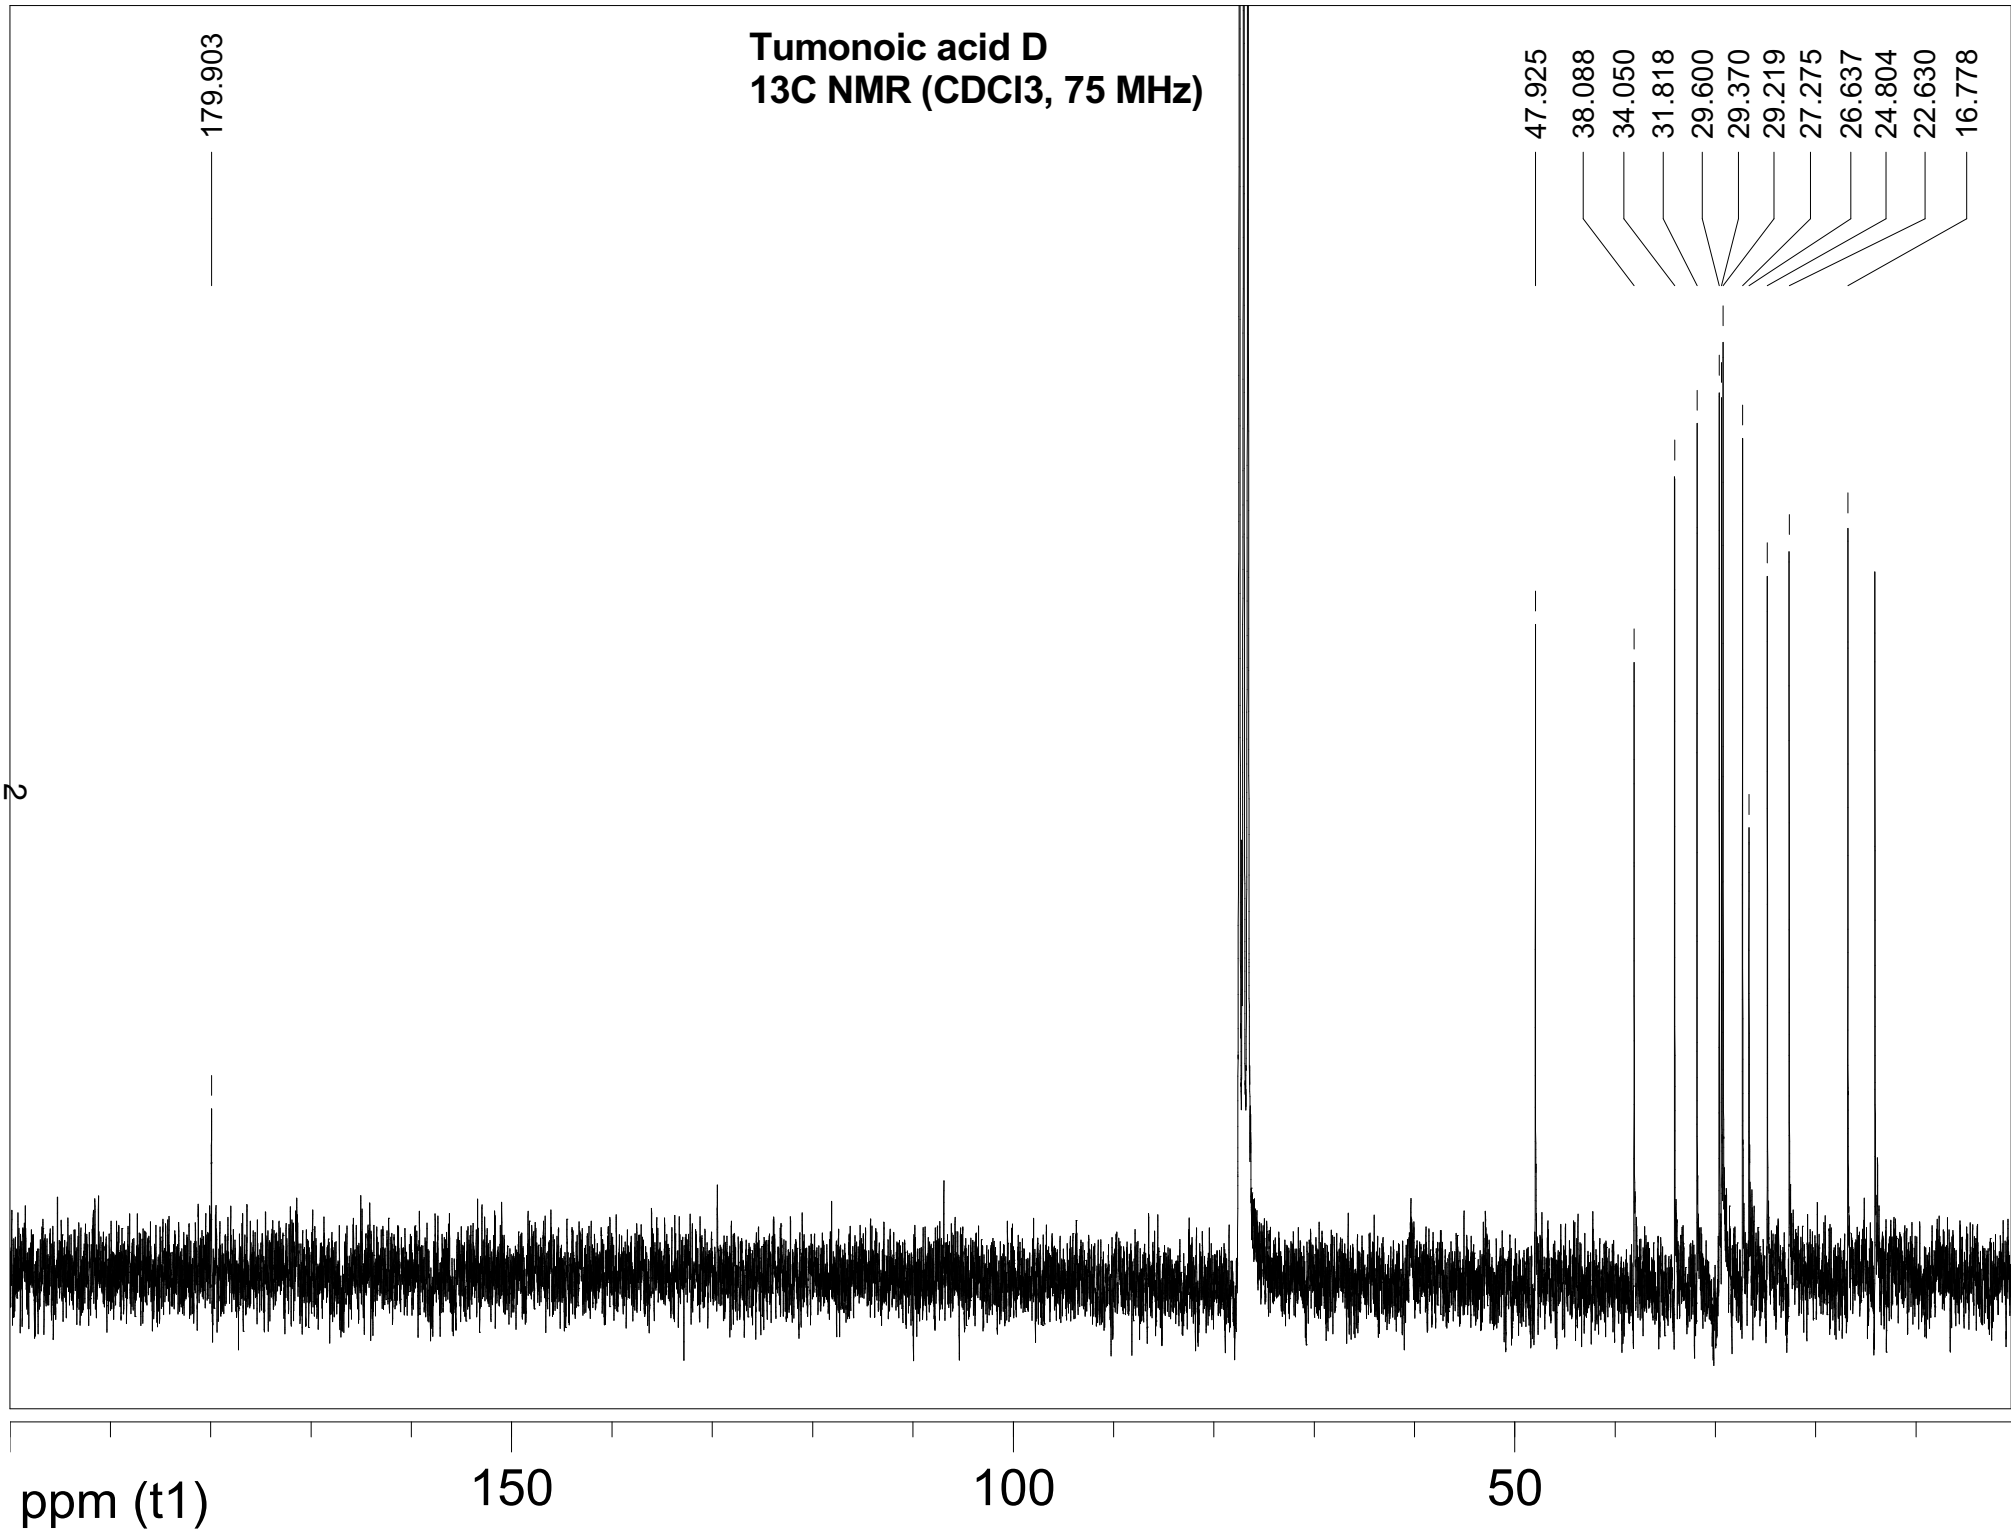

179.903

47.925  
38.088  
34.050  
31.818  
29.600  
29.370  
29.219  
27.275  
26.637  
24.804  
22.630  
16.778

ppm (t1)

150

100

50

**Tumonoic acid D**  
**gCOSY (CDCl<sub>3</sub>, 500 MHz)**

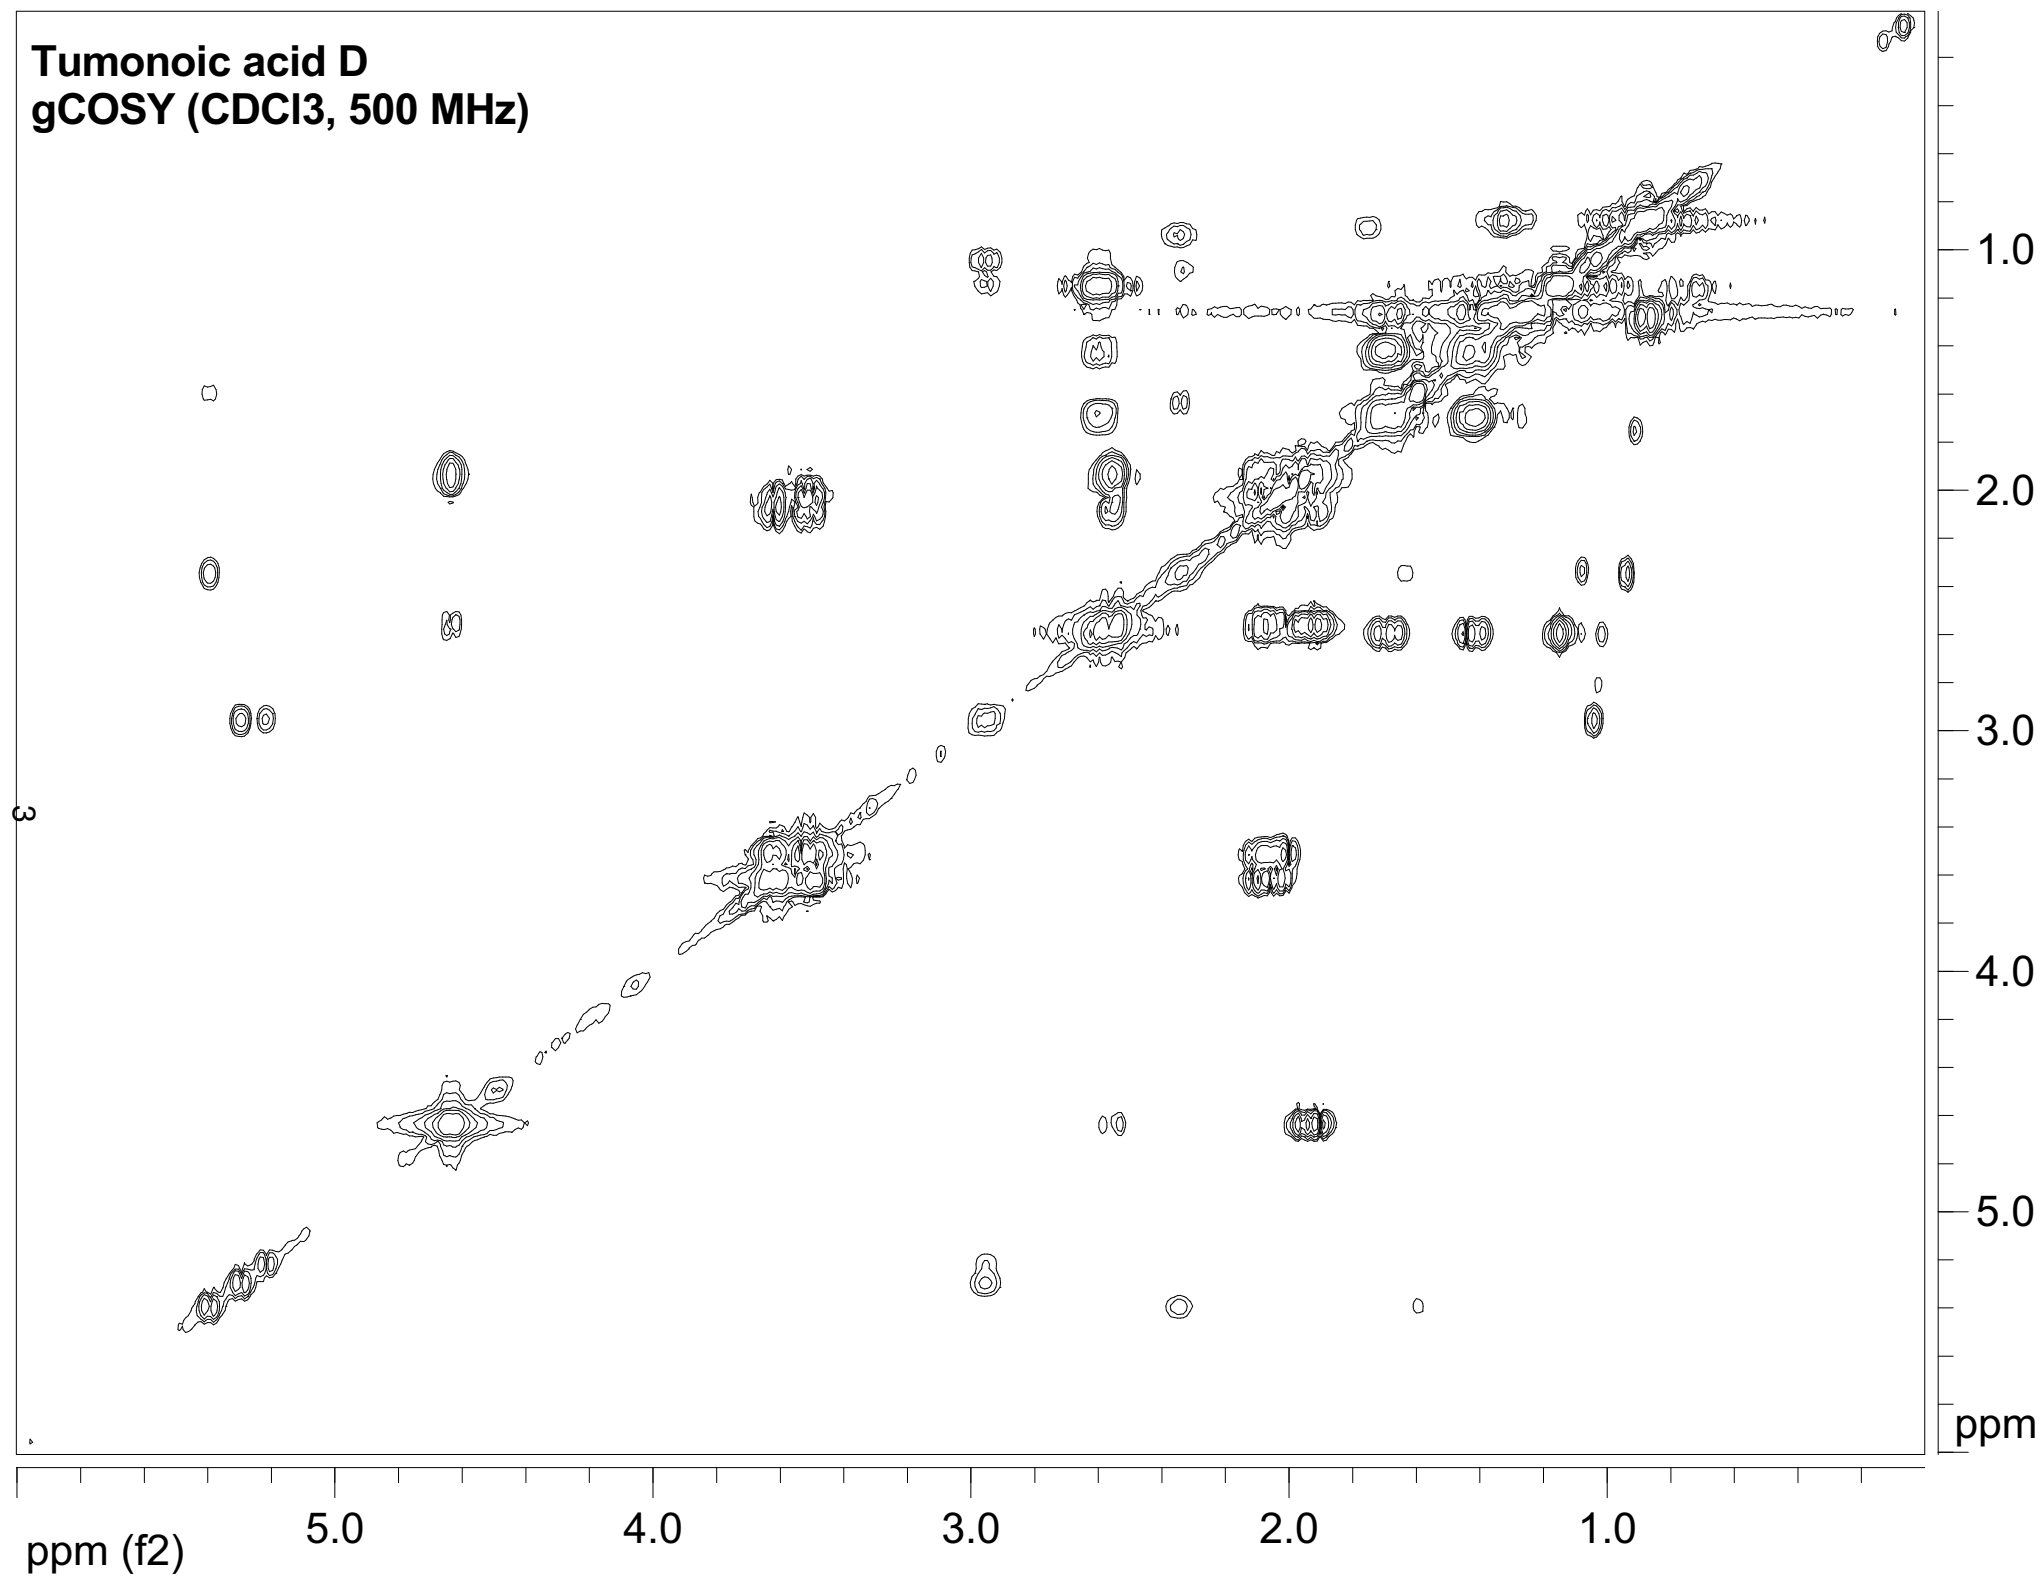

**Tumonoic acid D**  
**gHSQC (CDCl<sub>3</sub>, 500 MHz)**

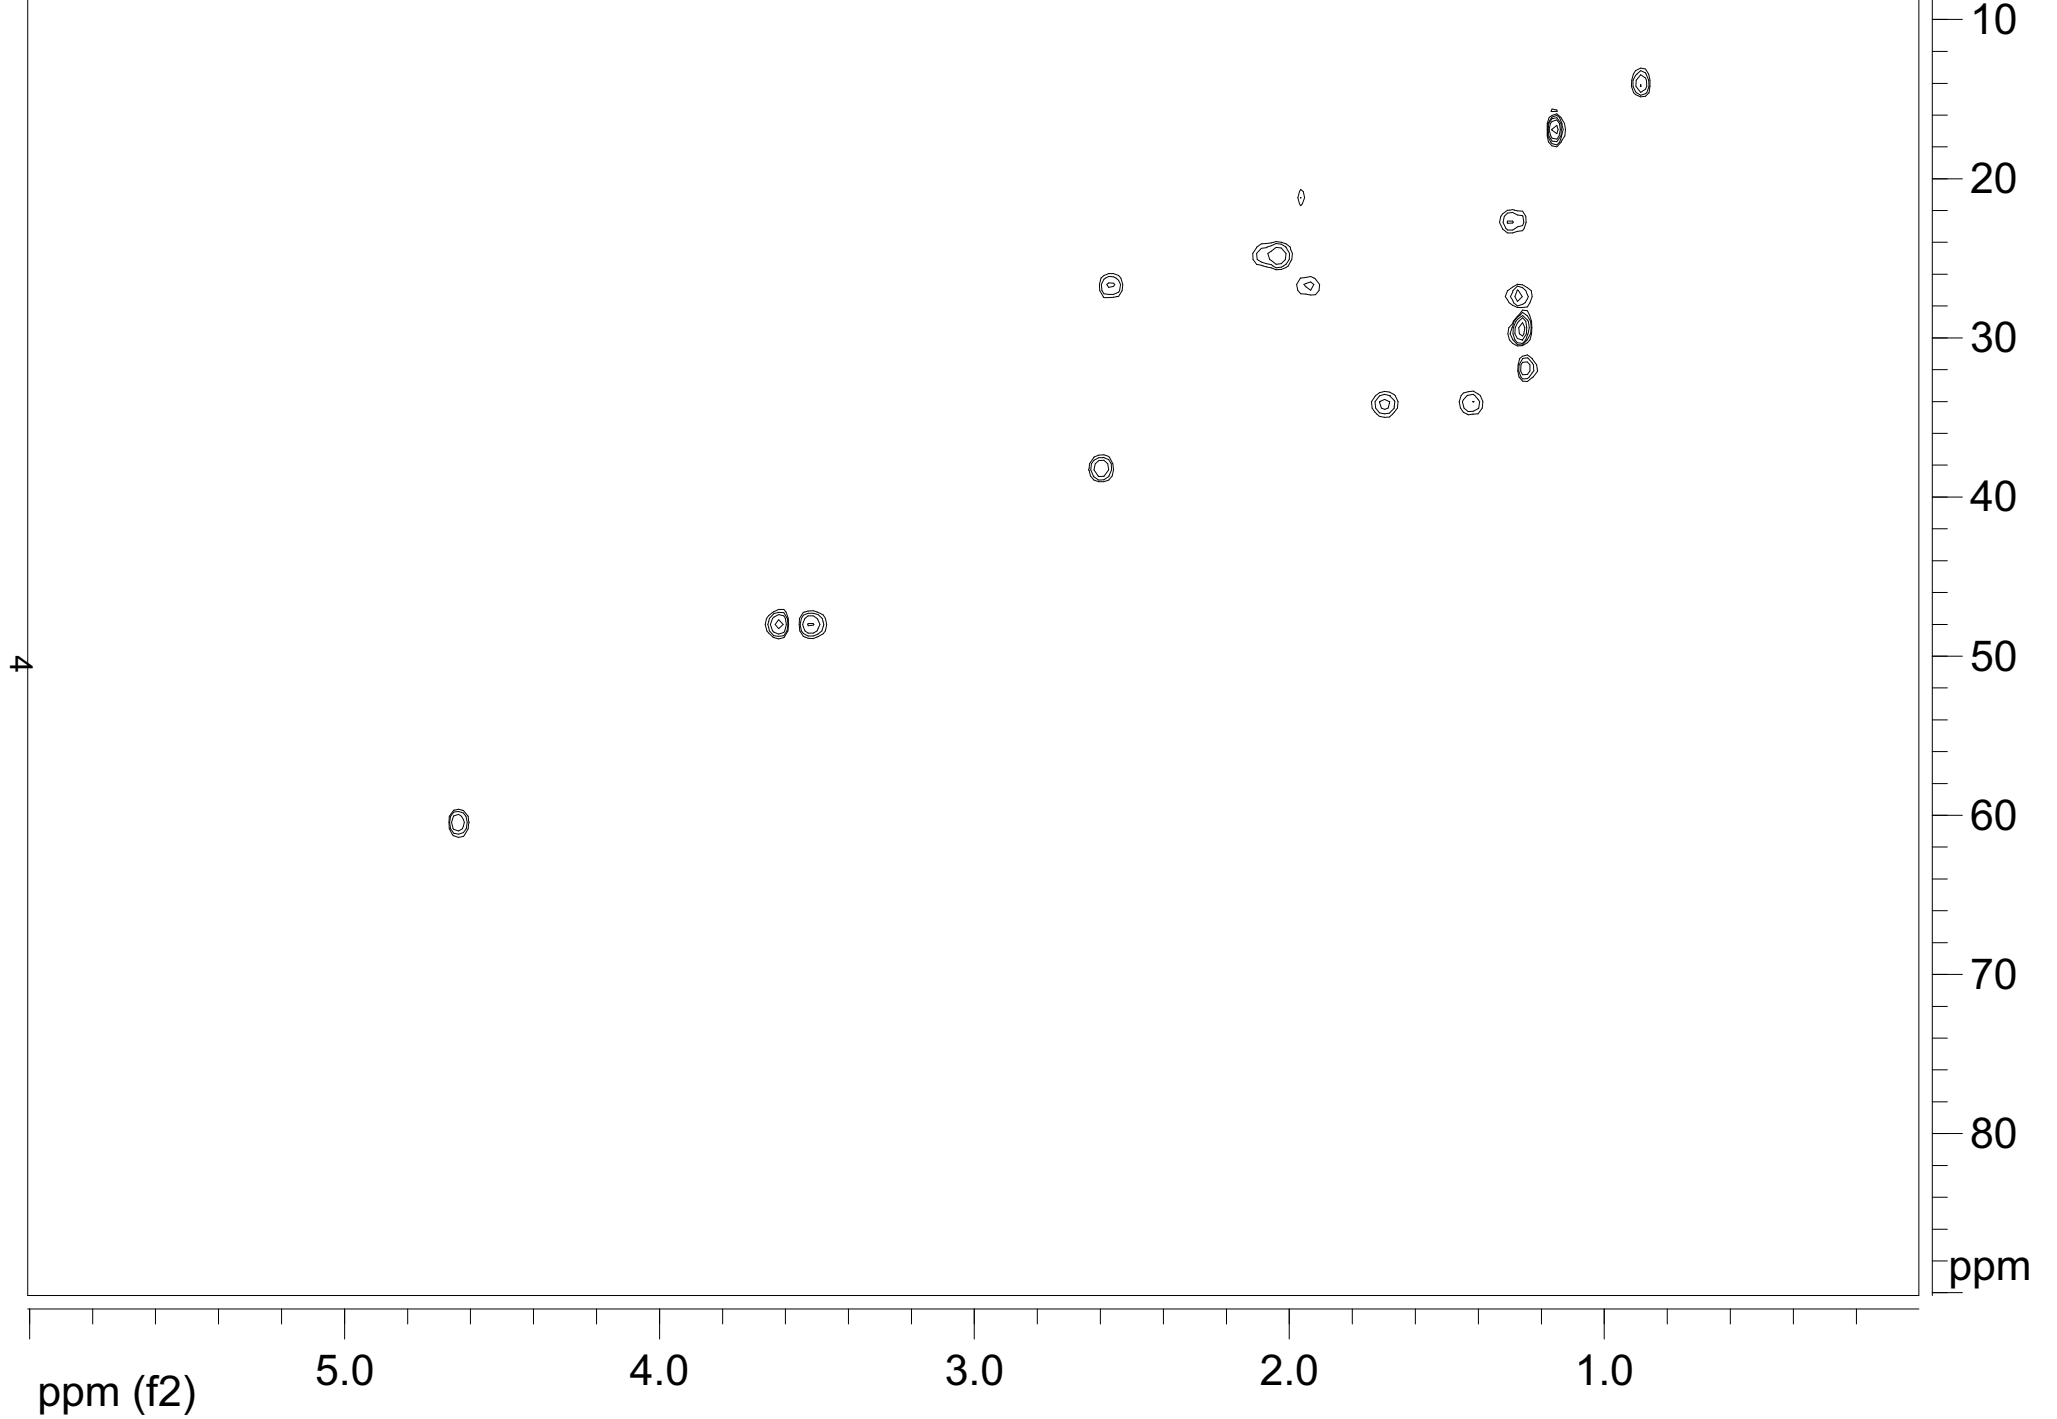

**Tumonoic acid D**  
**gHMBC (CDCl<sub>3</sub>, 500 MHz)**

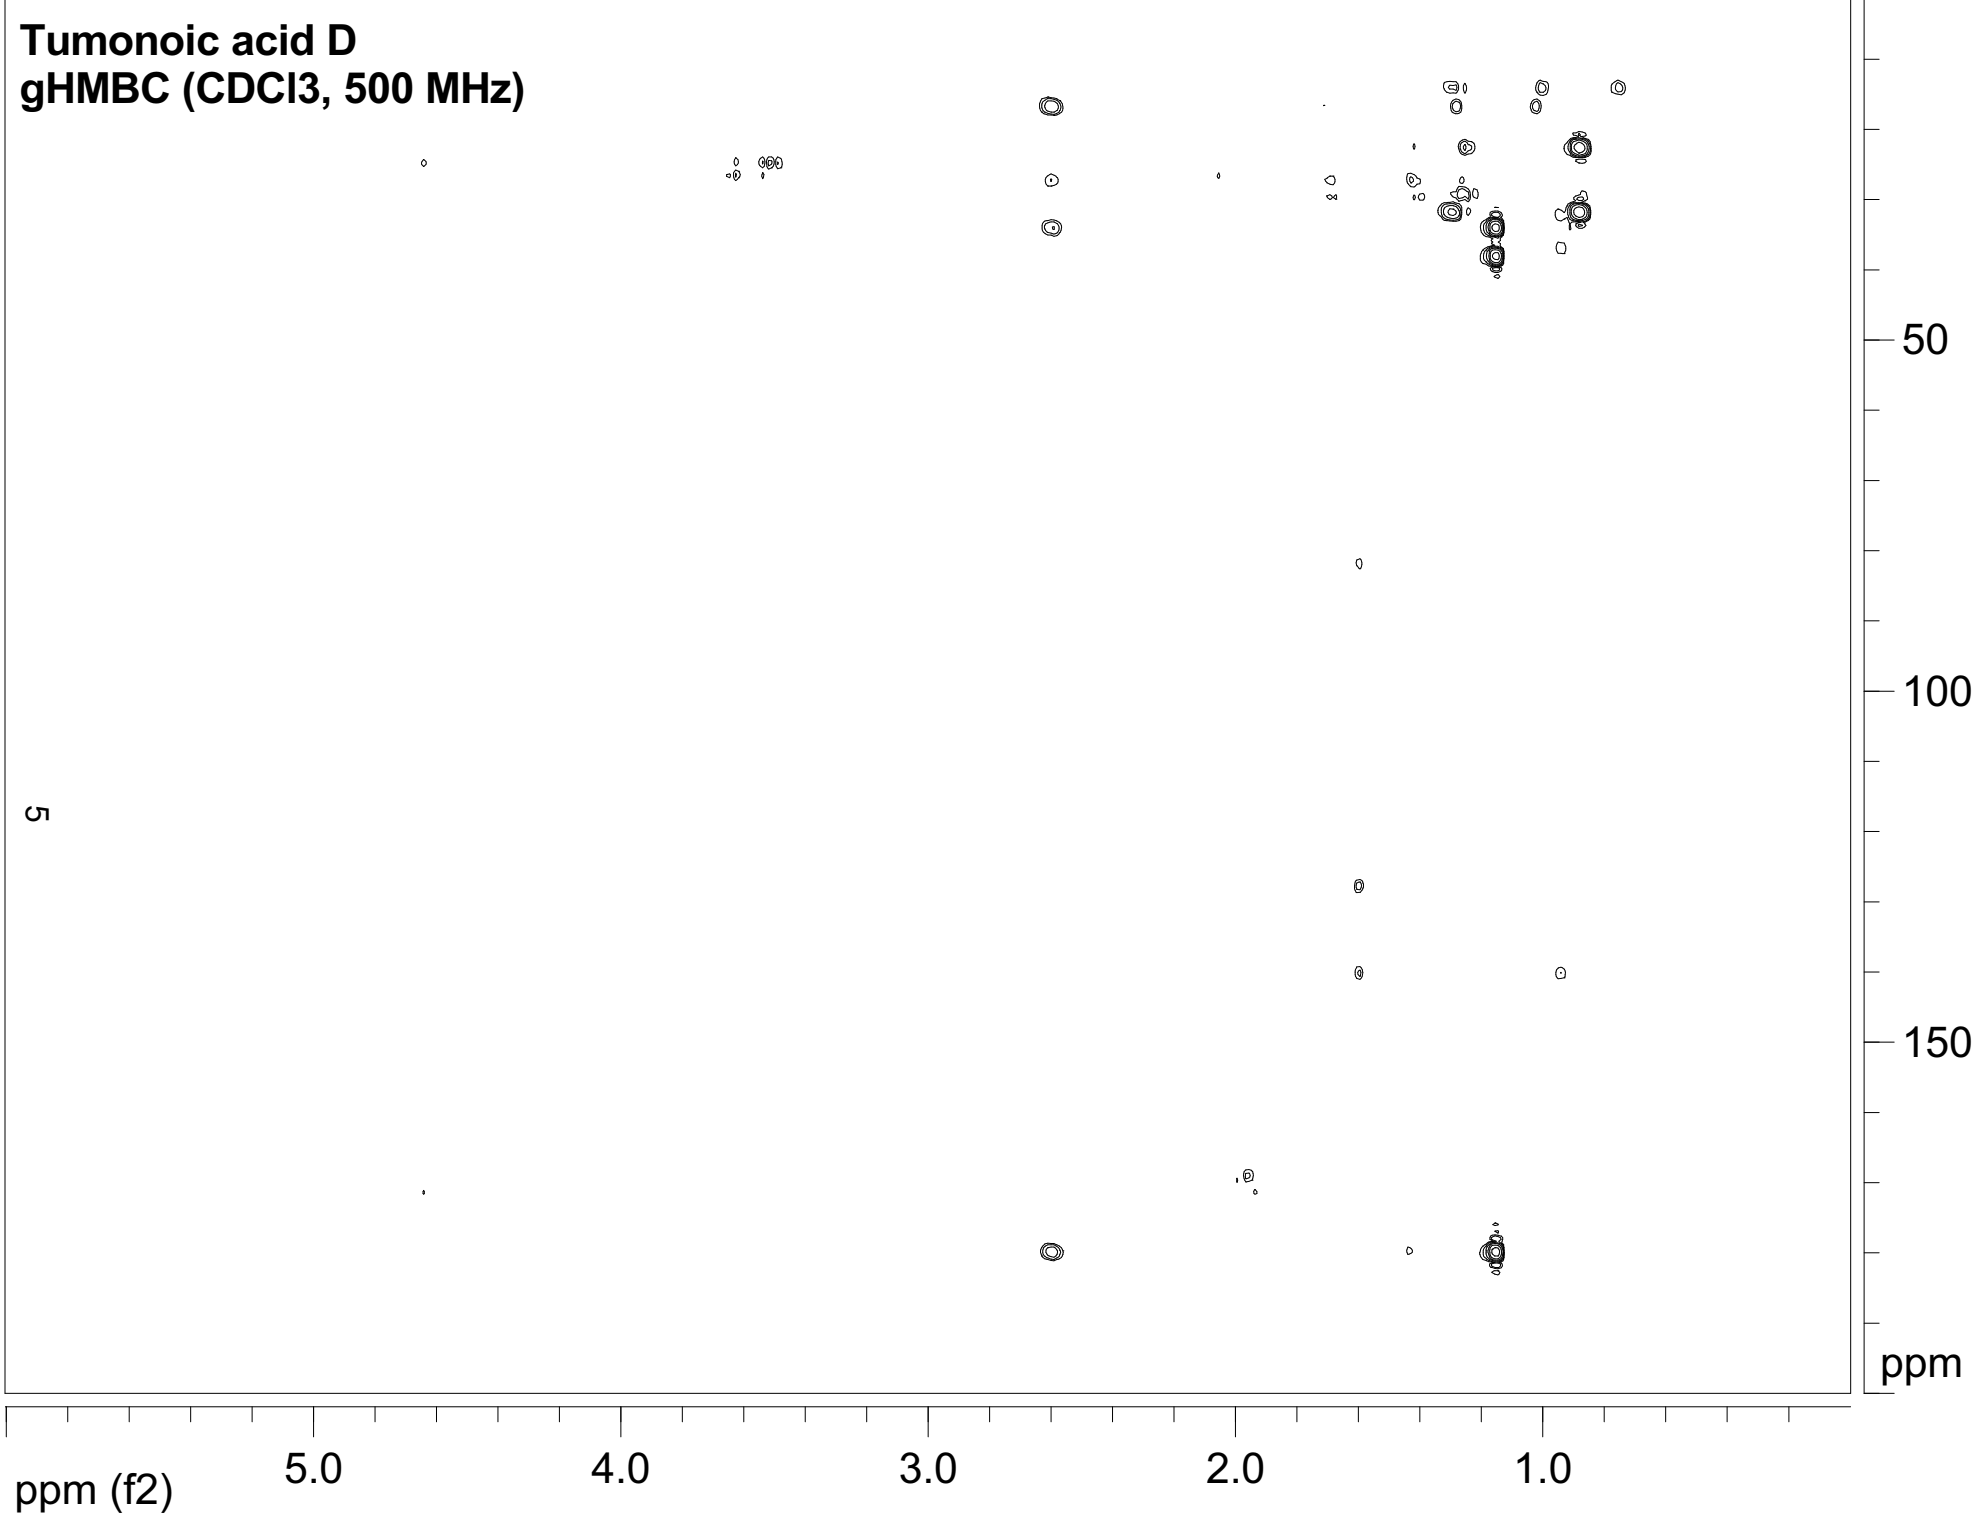

**Tumonoic acid E**  
**<sup>1</sup>H NMR (CDCl<sub>3</sub>, 500 MHz)**

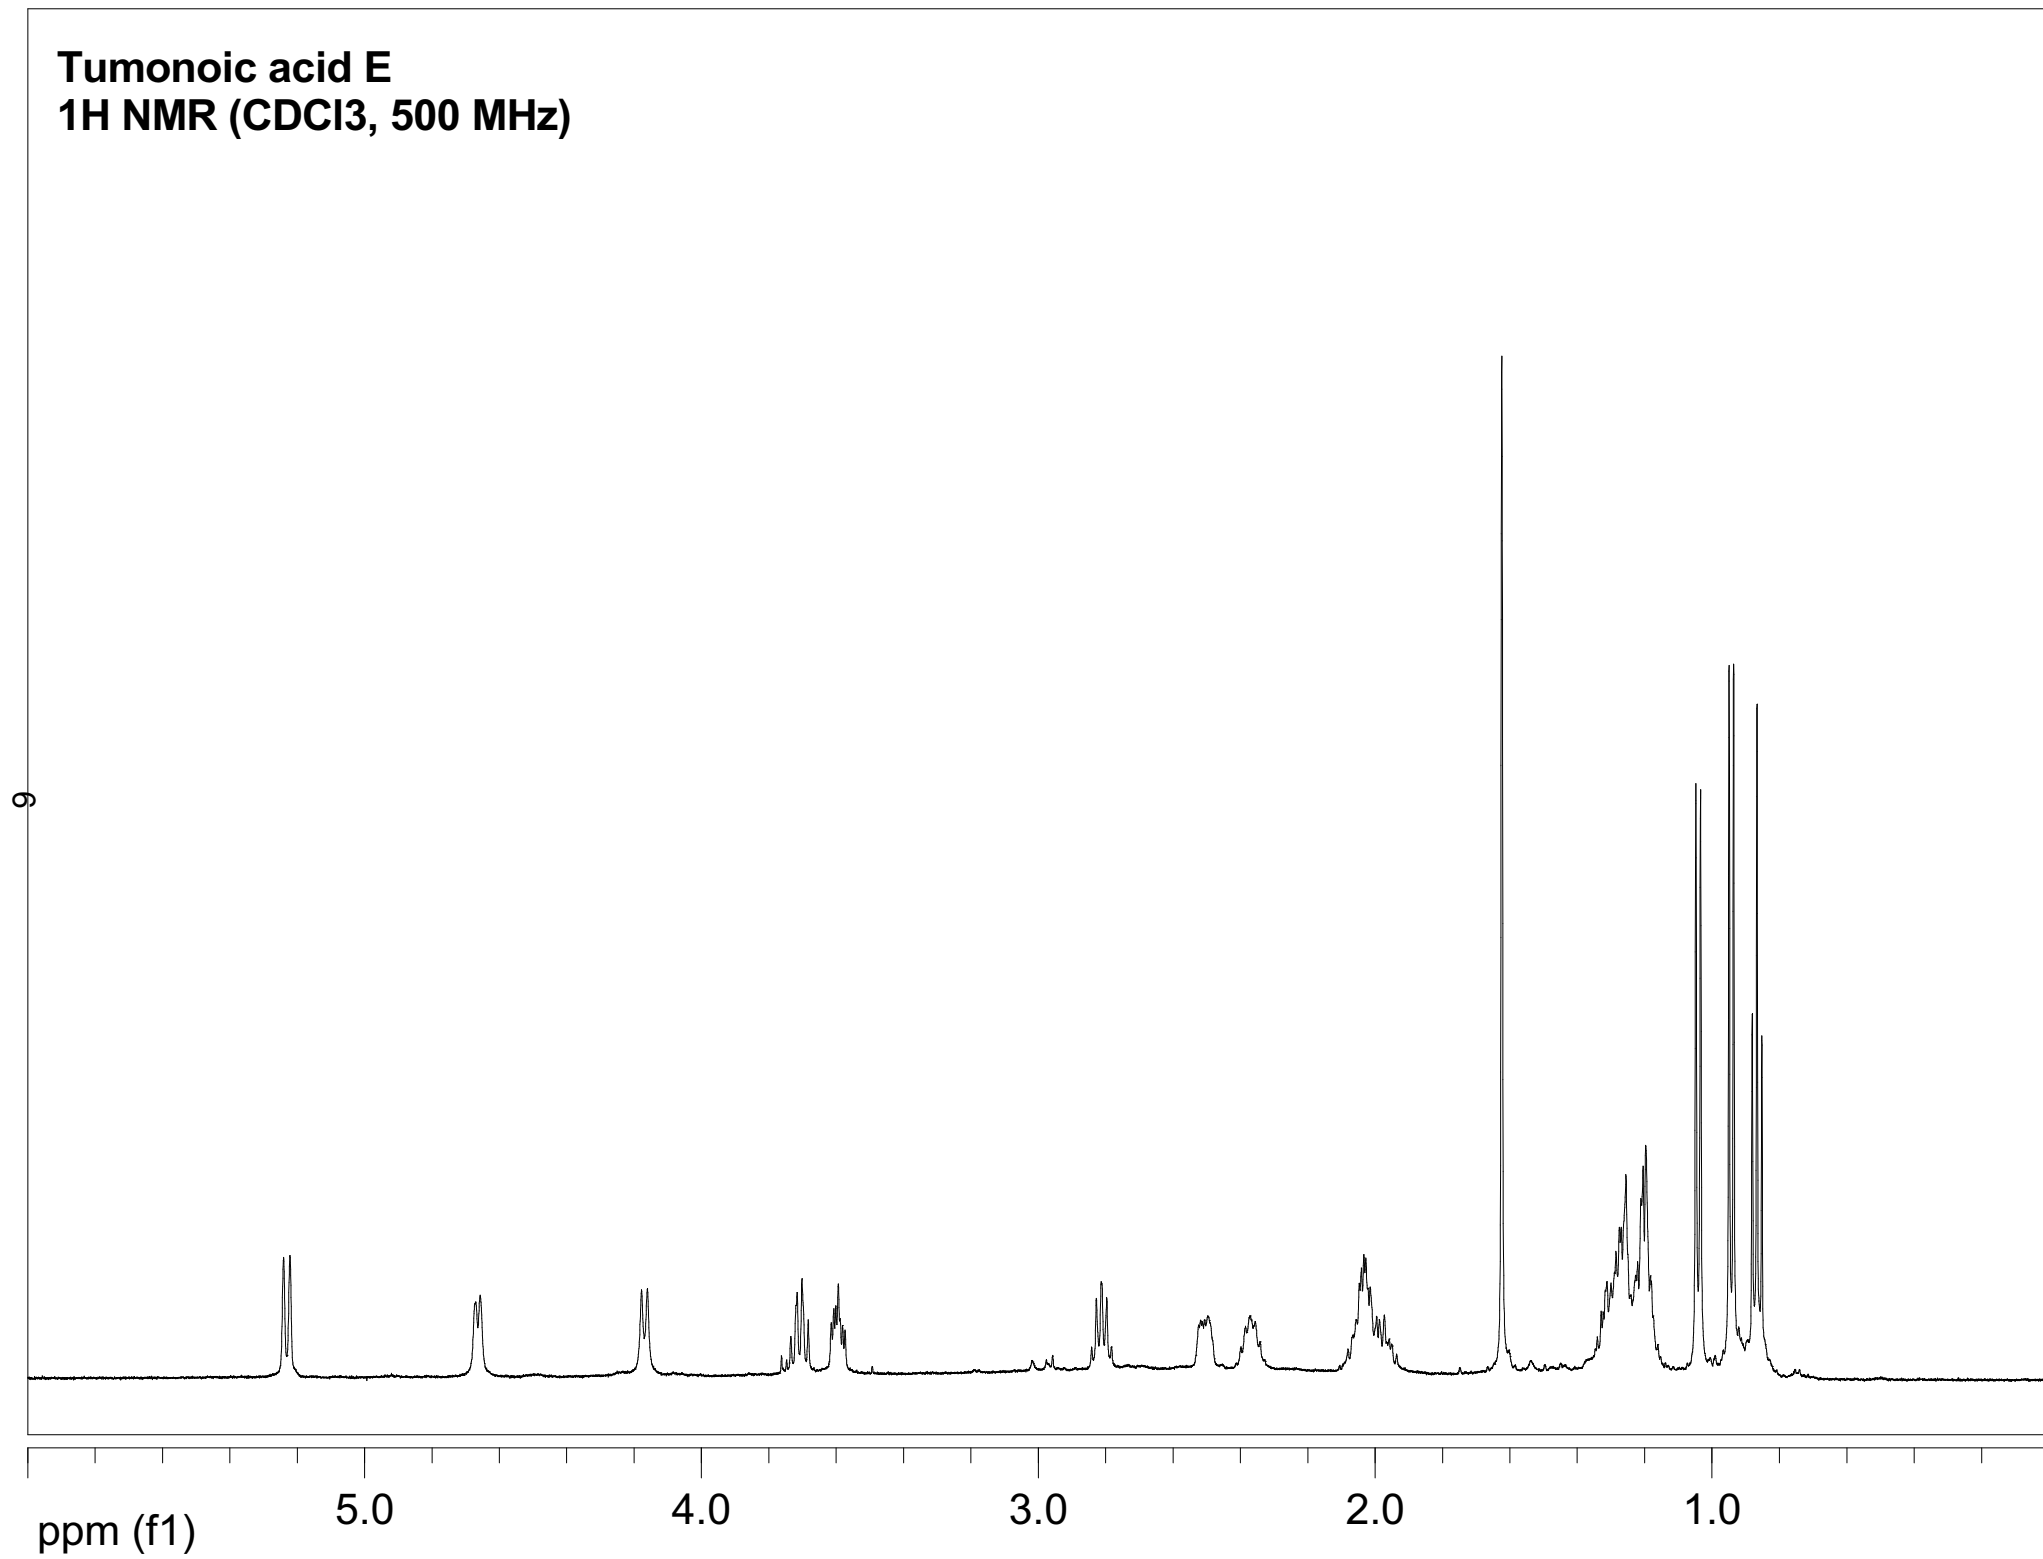



**Tumonoic acid E**  
**<sup>13</sup>C Spectrum**  
**(CDCl<sub>3</sub>, 75 MHz)**

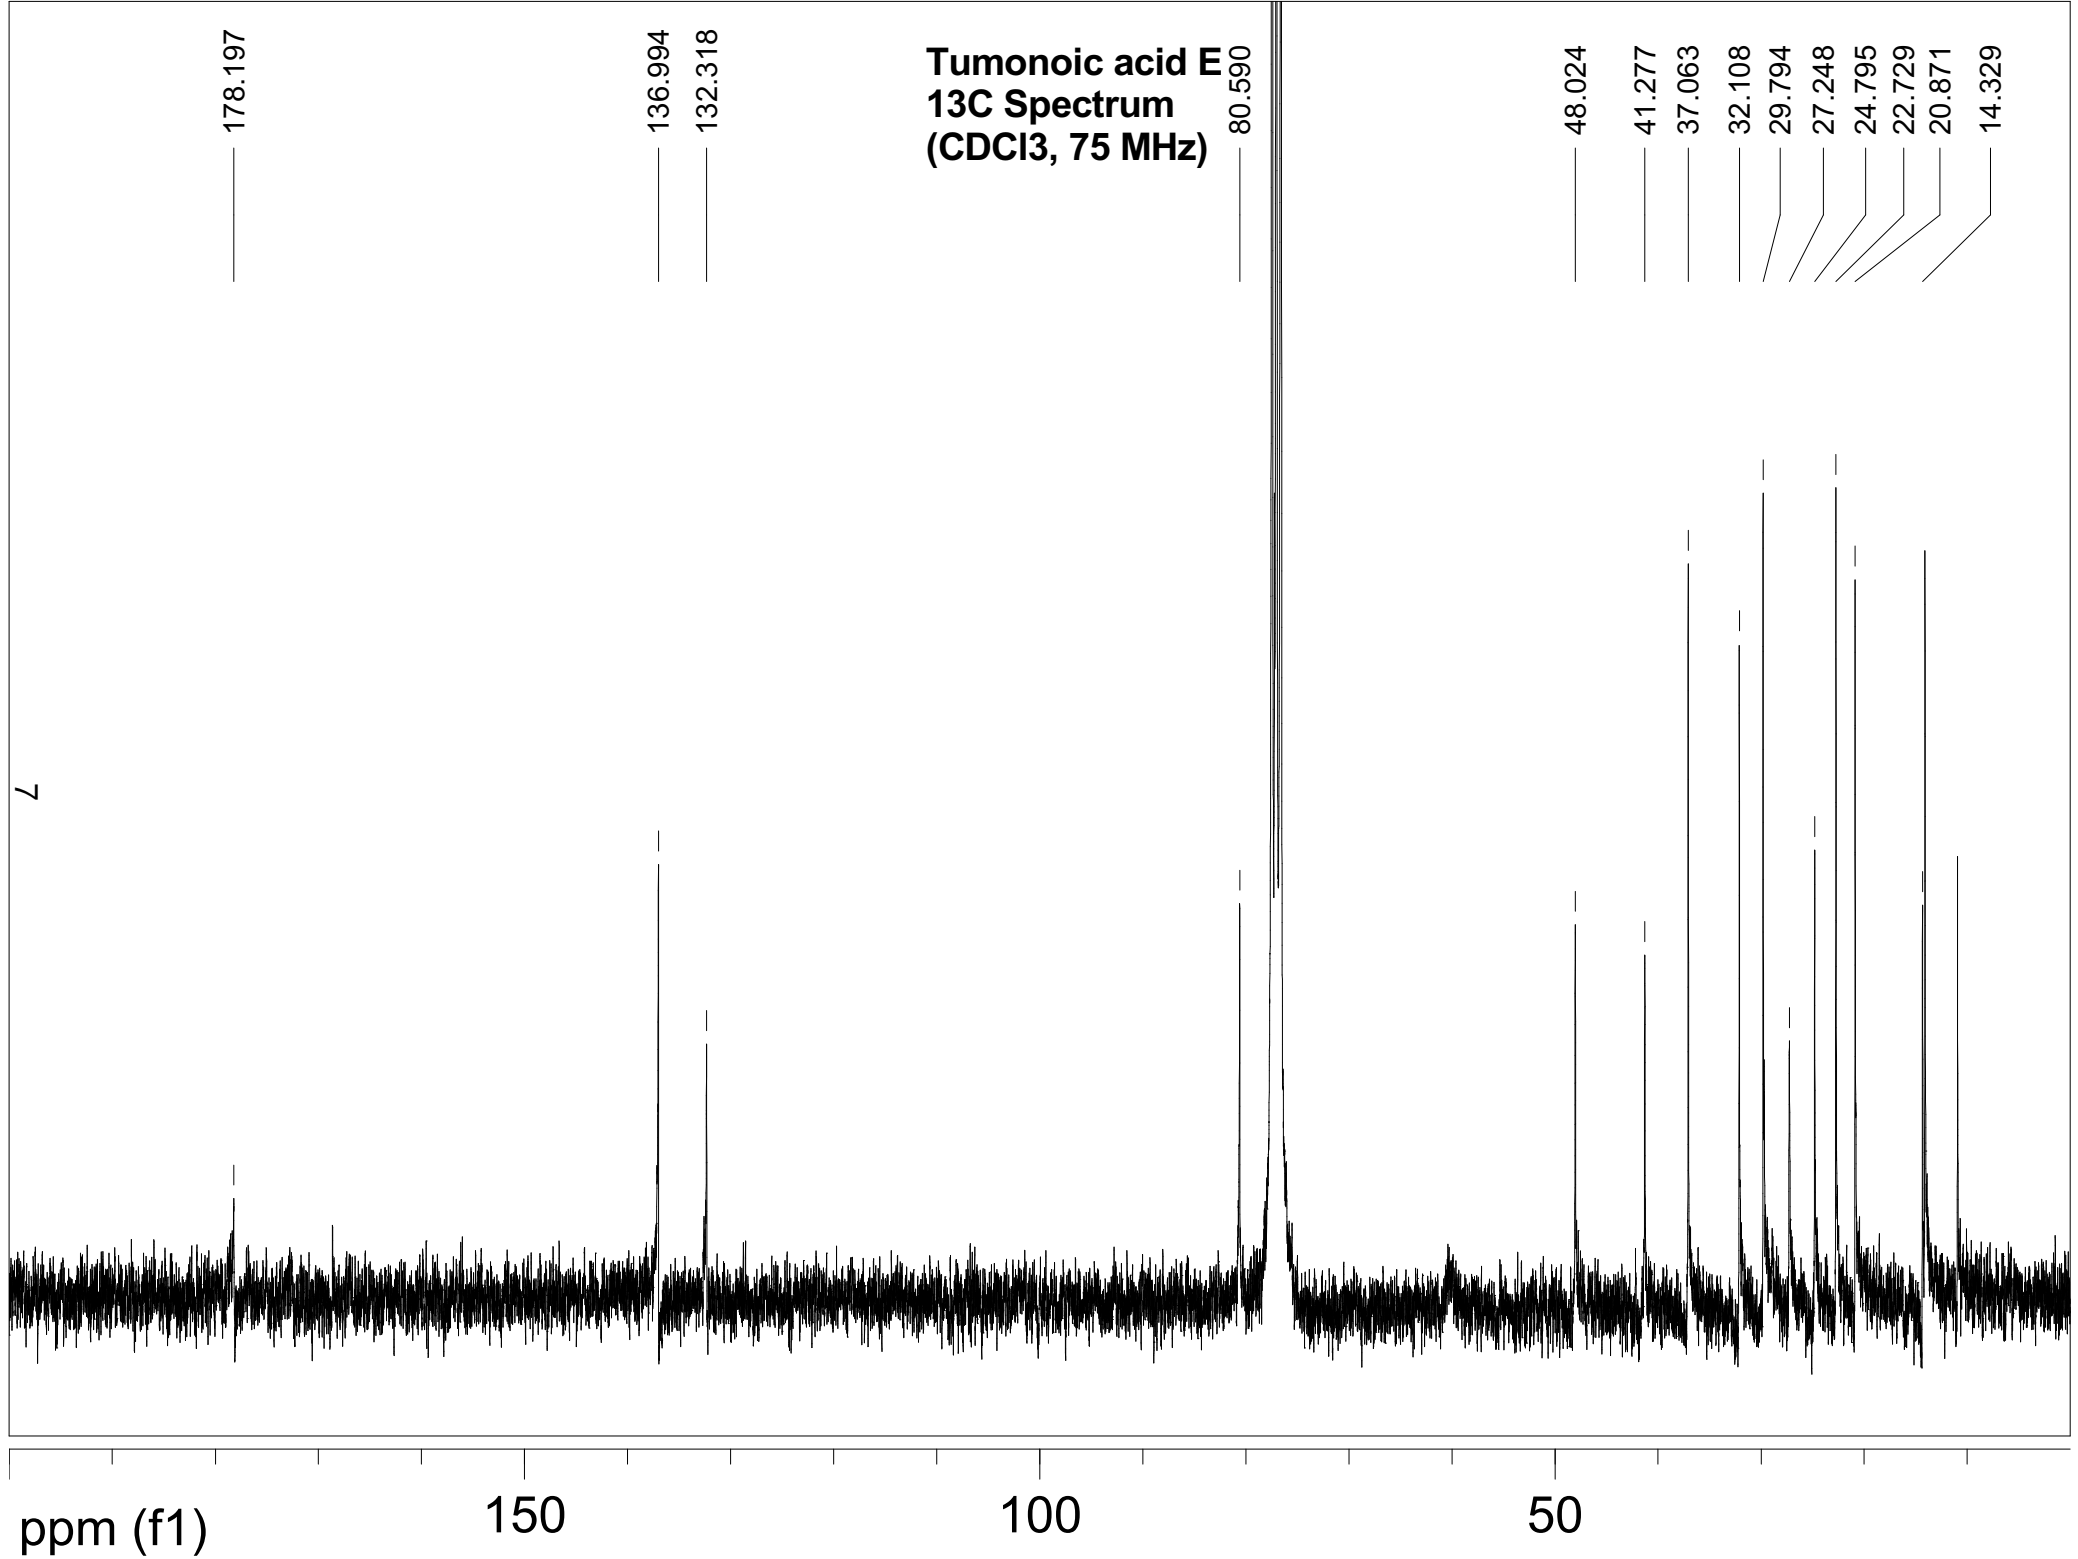

**Tumonoic acid E**  
**gCOSY (CDCl<sub>3</sub>, 500 MHz)**

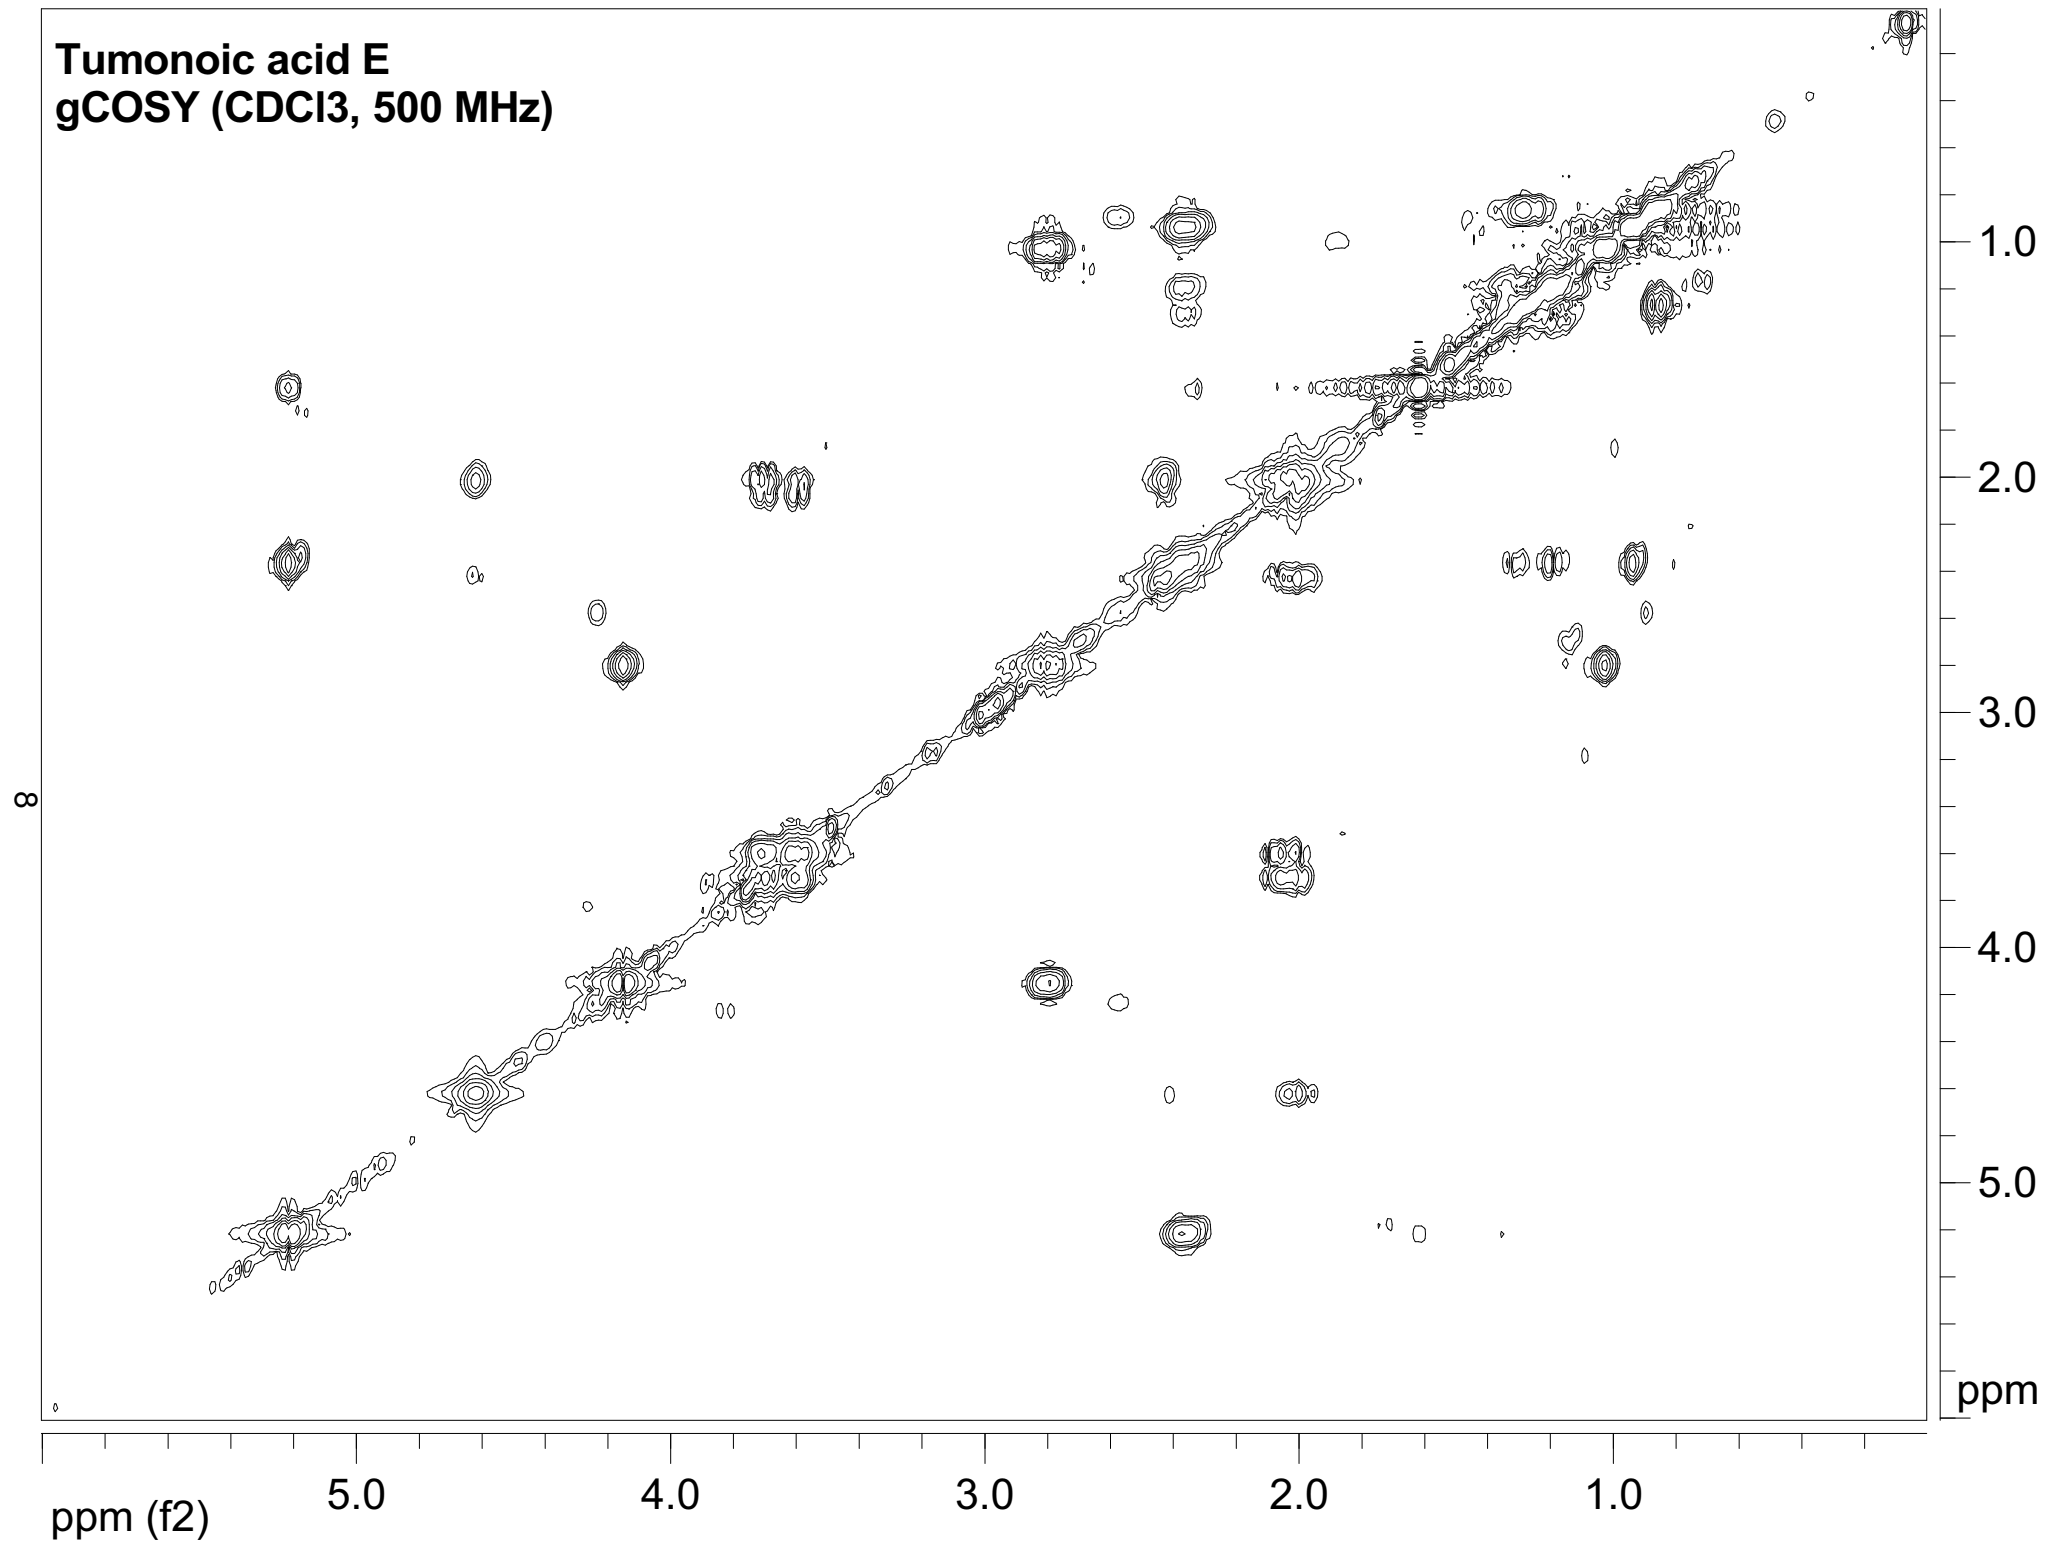

8

ppm (f2)

5.0

4.0

3.0

2.0

1.0

ppm

1.0

2.0

3.0

4.0

5.0

Tumonoic acid E  
gHSQC (CDCl<sub>3</sub>, 500 MHz)

6

ppm (f2)

5.0

4.0

3.0

2.0

1.0

ppm

50

100

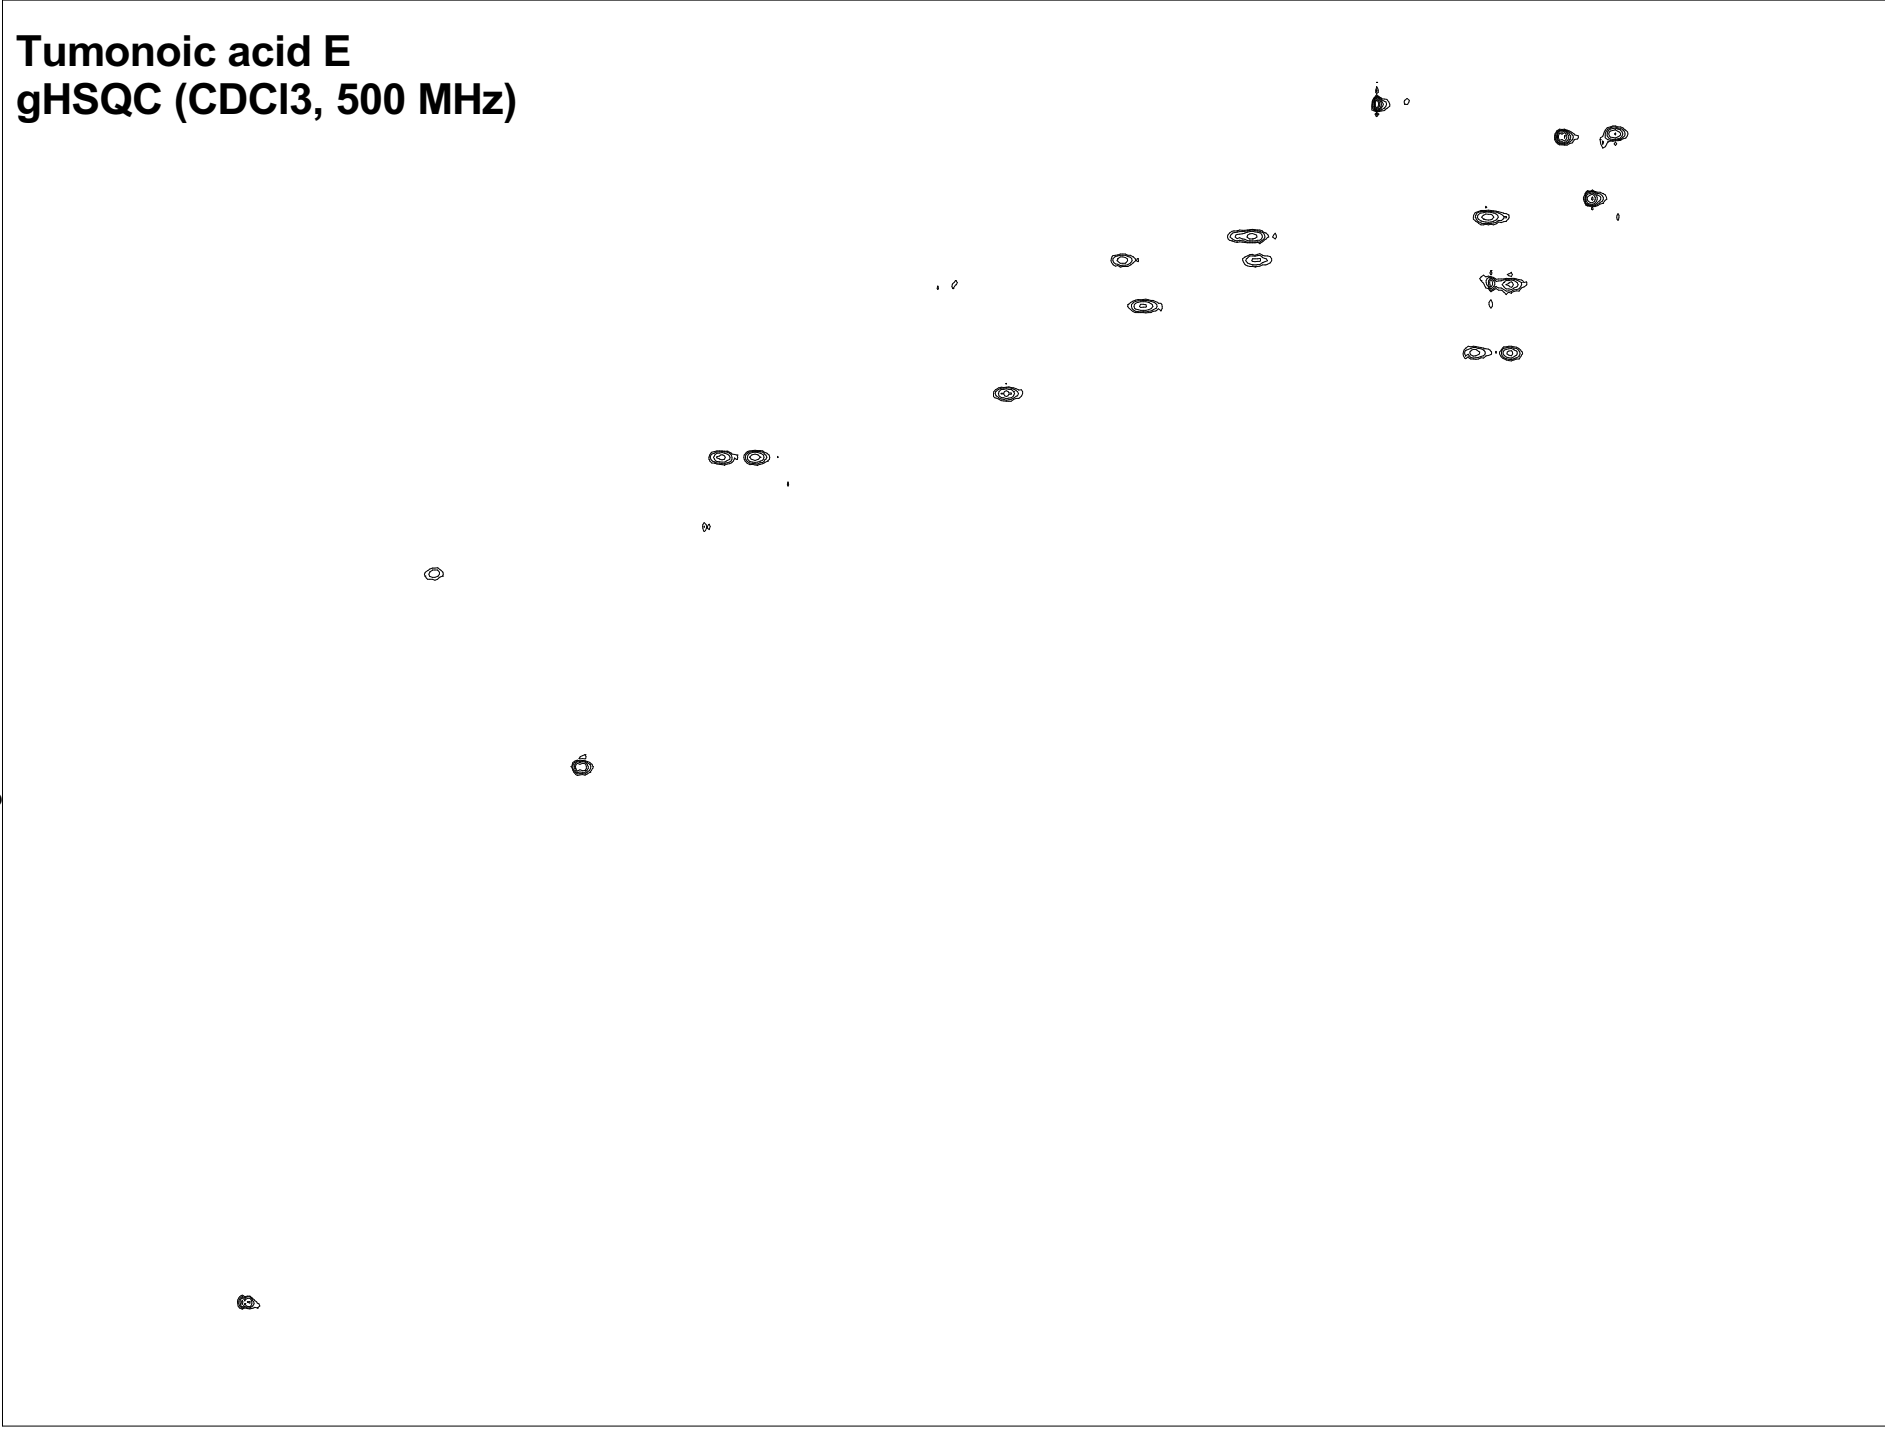

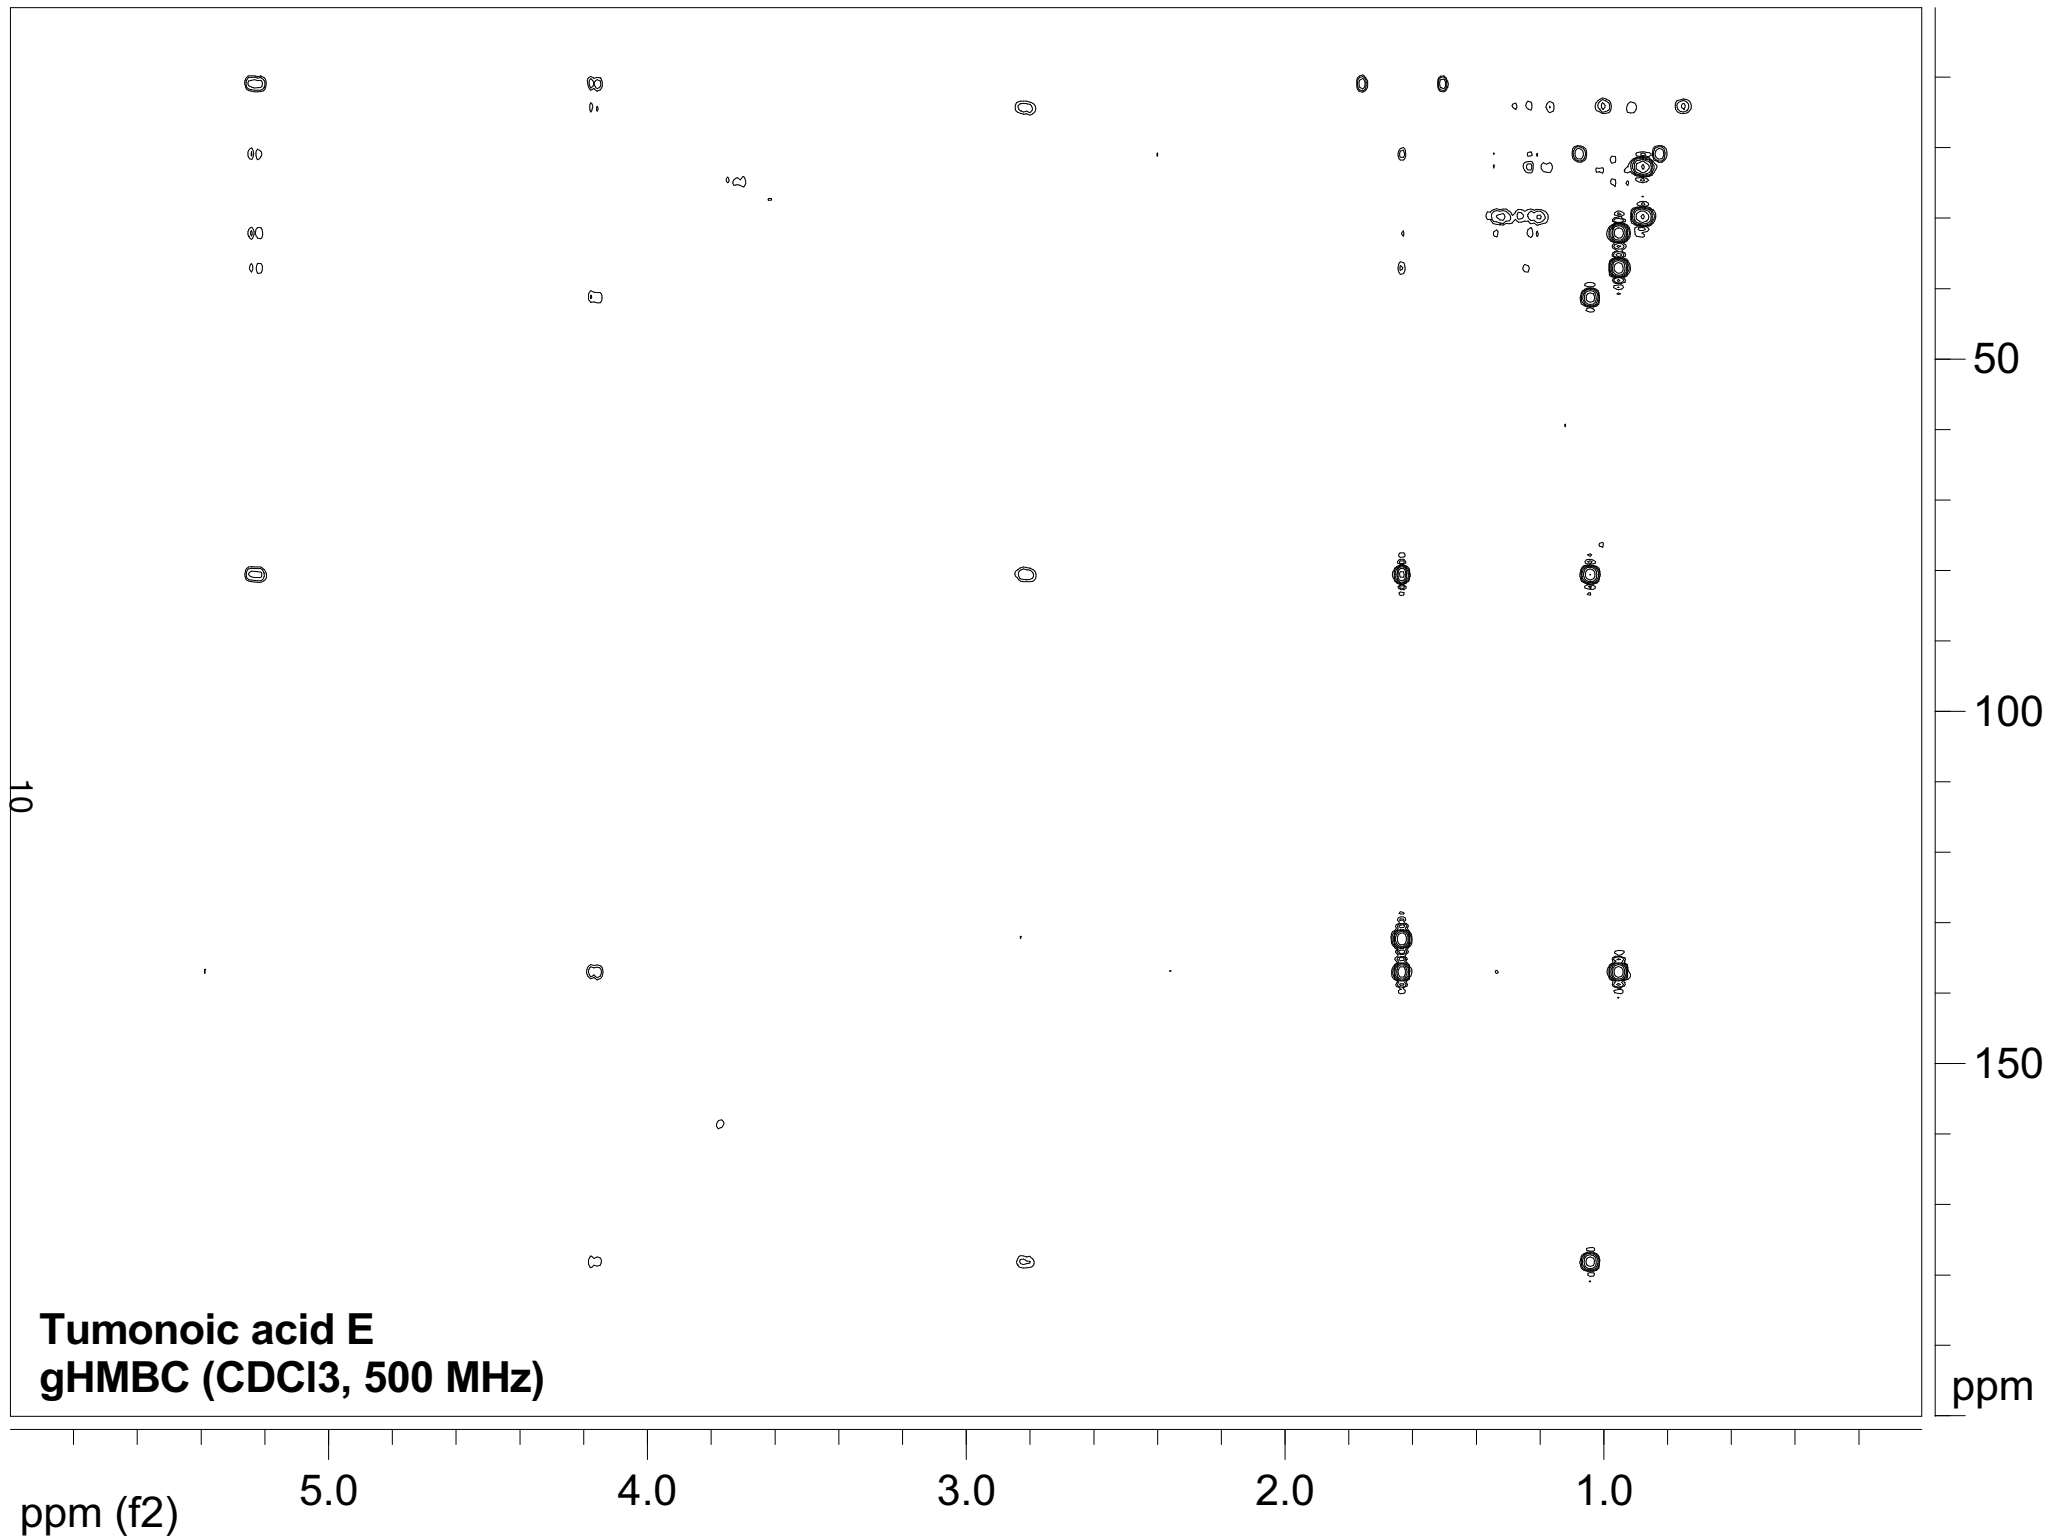

**Tumonoic acid F**  
**<sup>1</sup>H NMR (CDCl<sub>3</sub>, 500 MHz)**

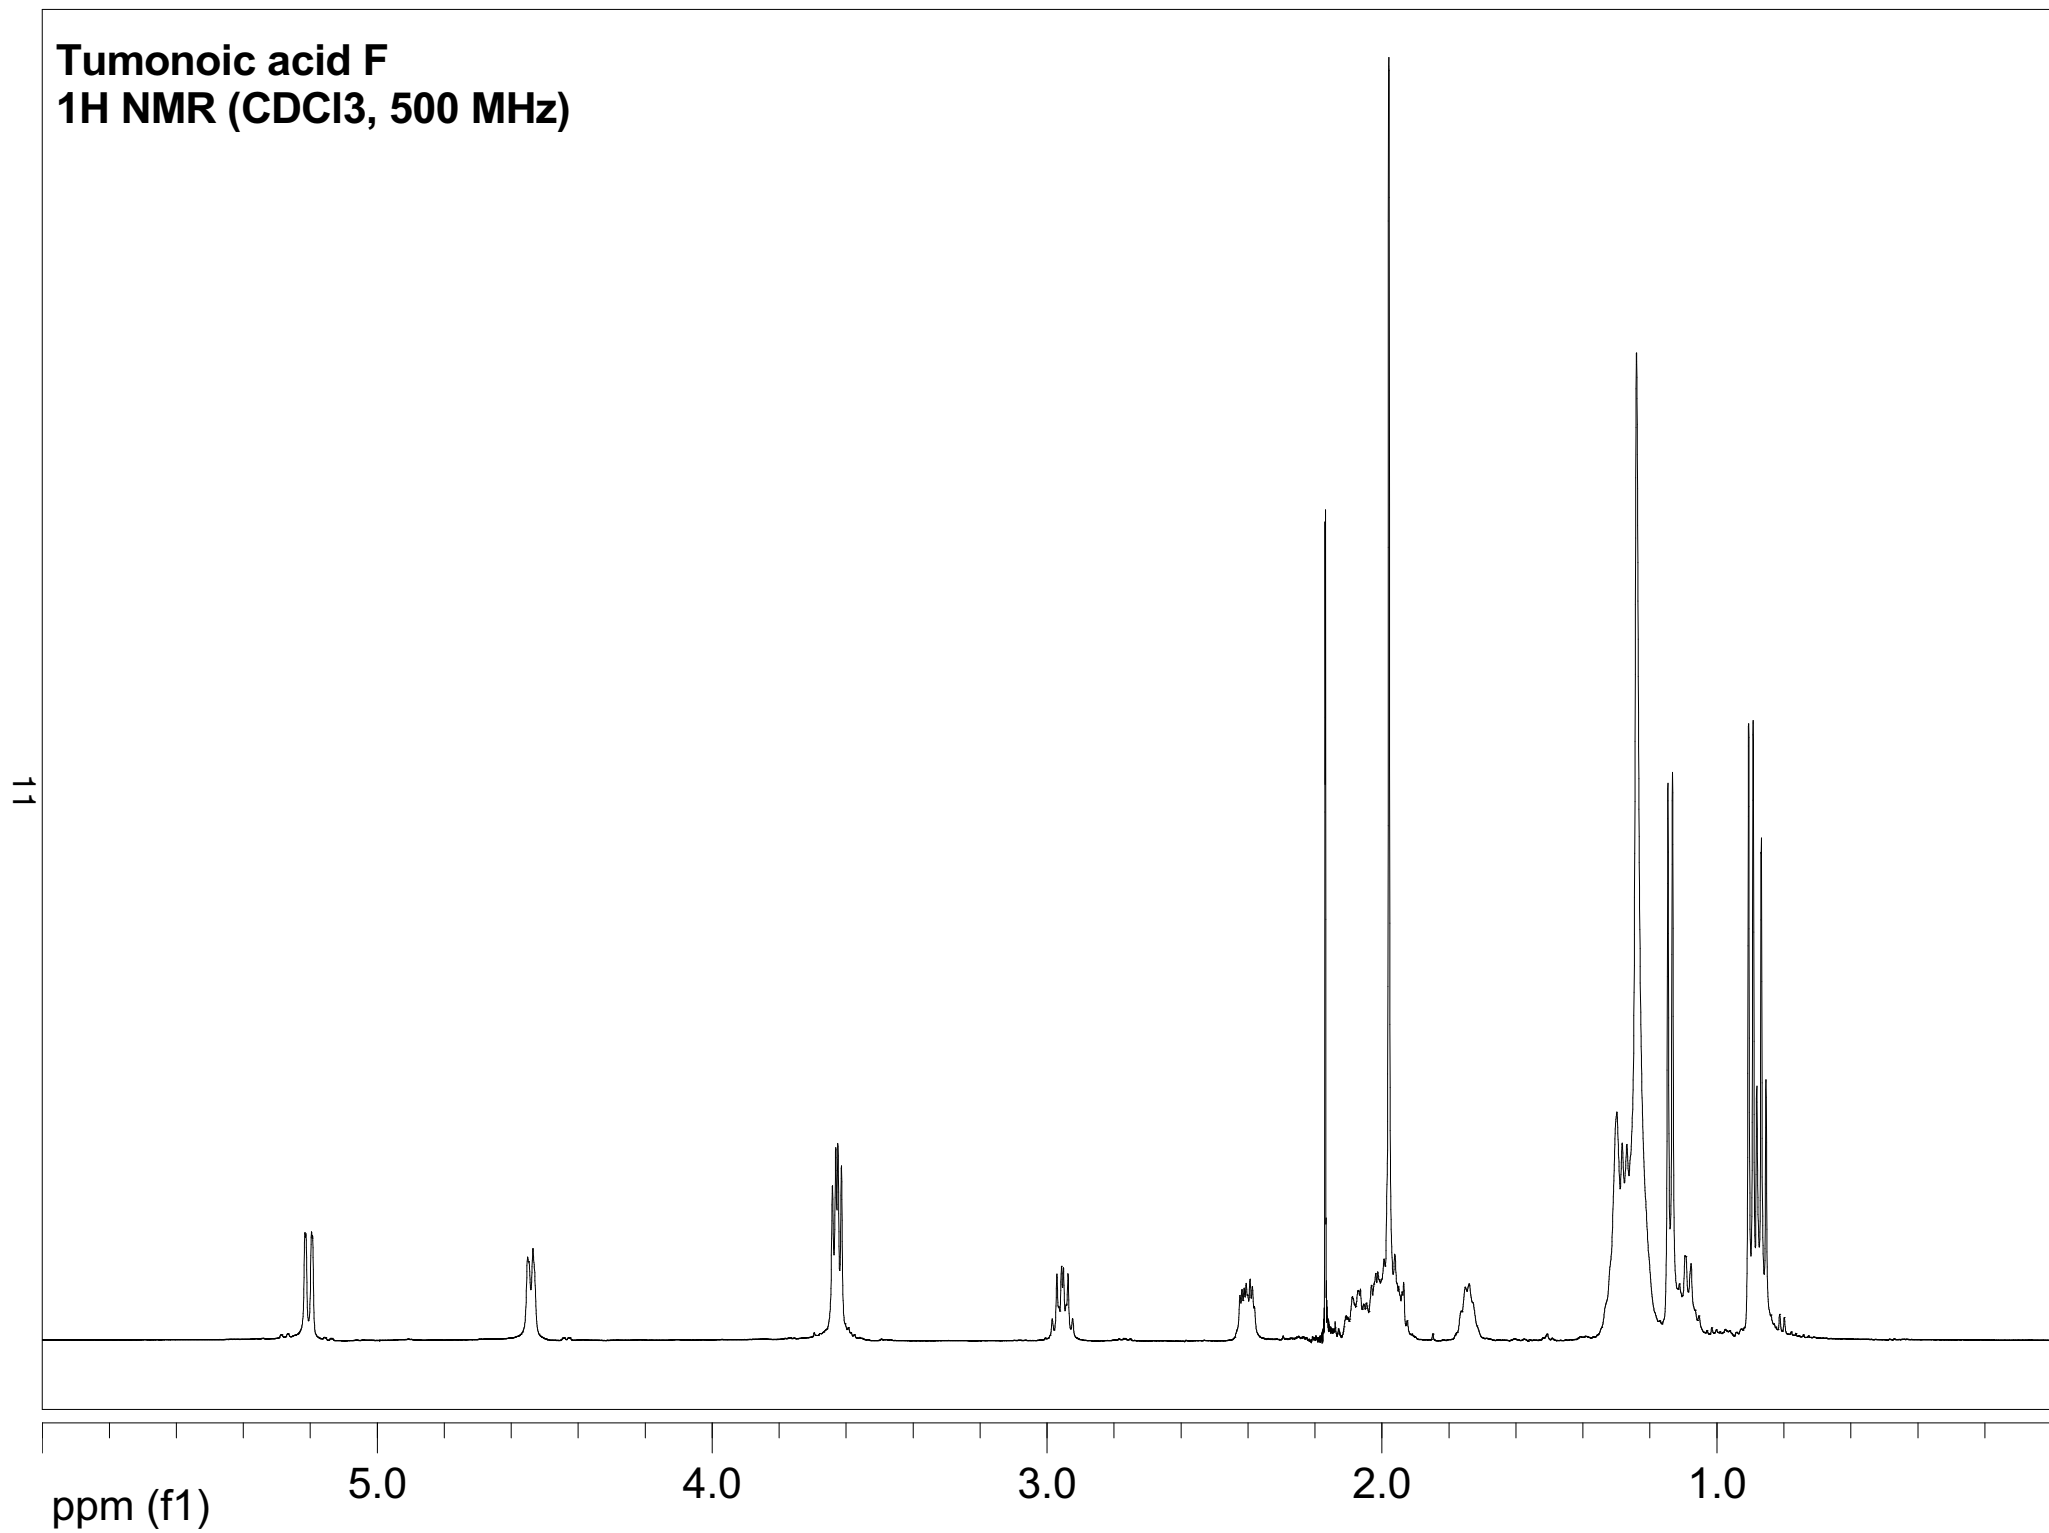

**Tumonoic acid F**  
**<sup>13</sup>C NMR (CDCl<sub>3</sub>, 75 MHz)**

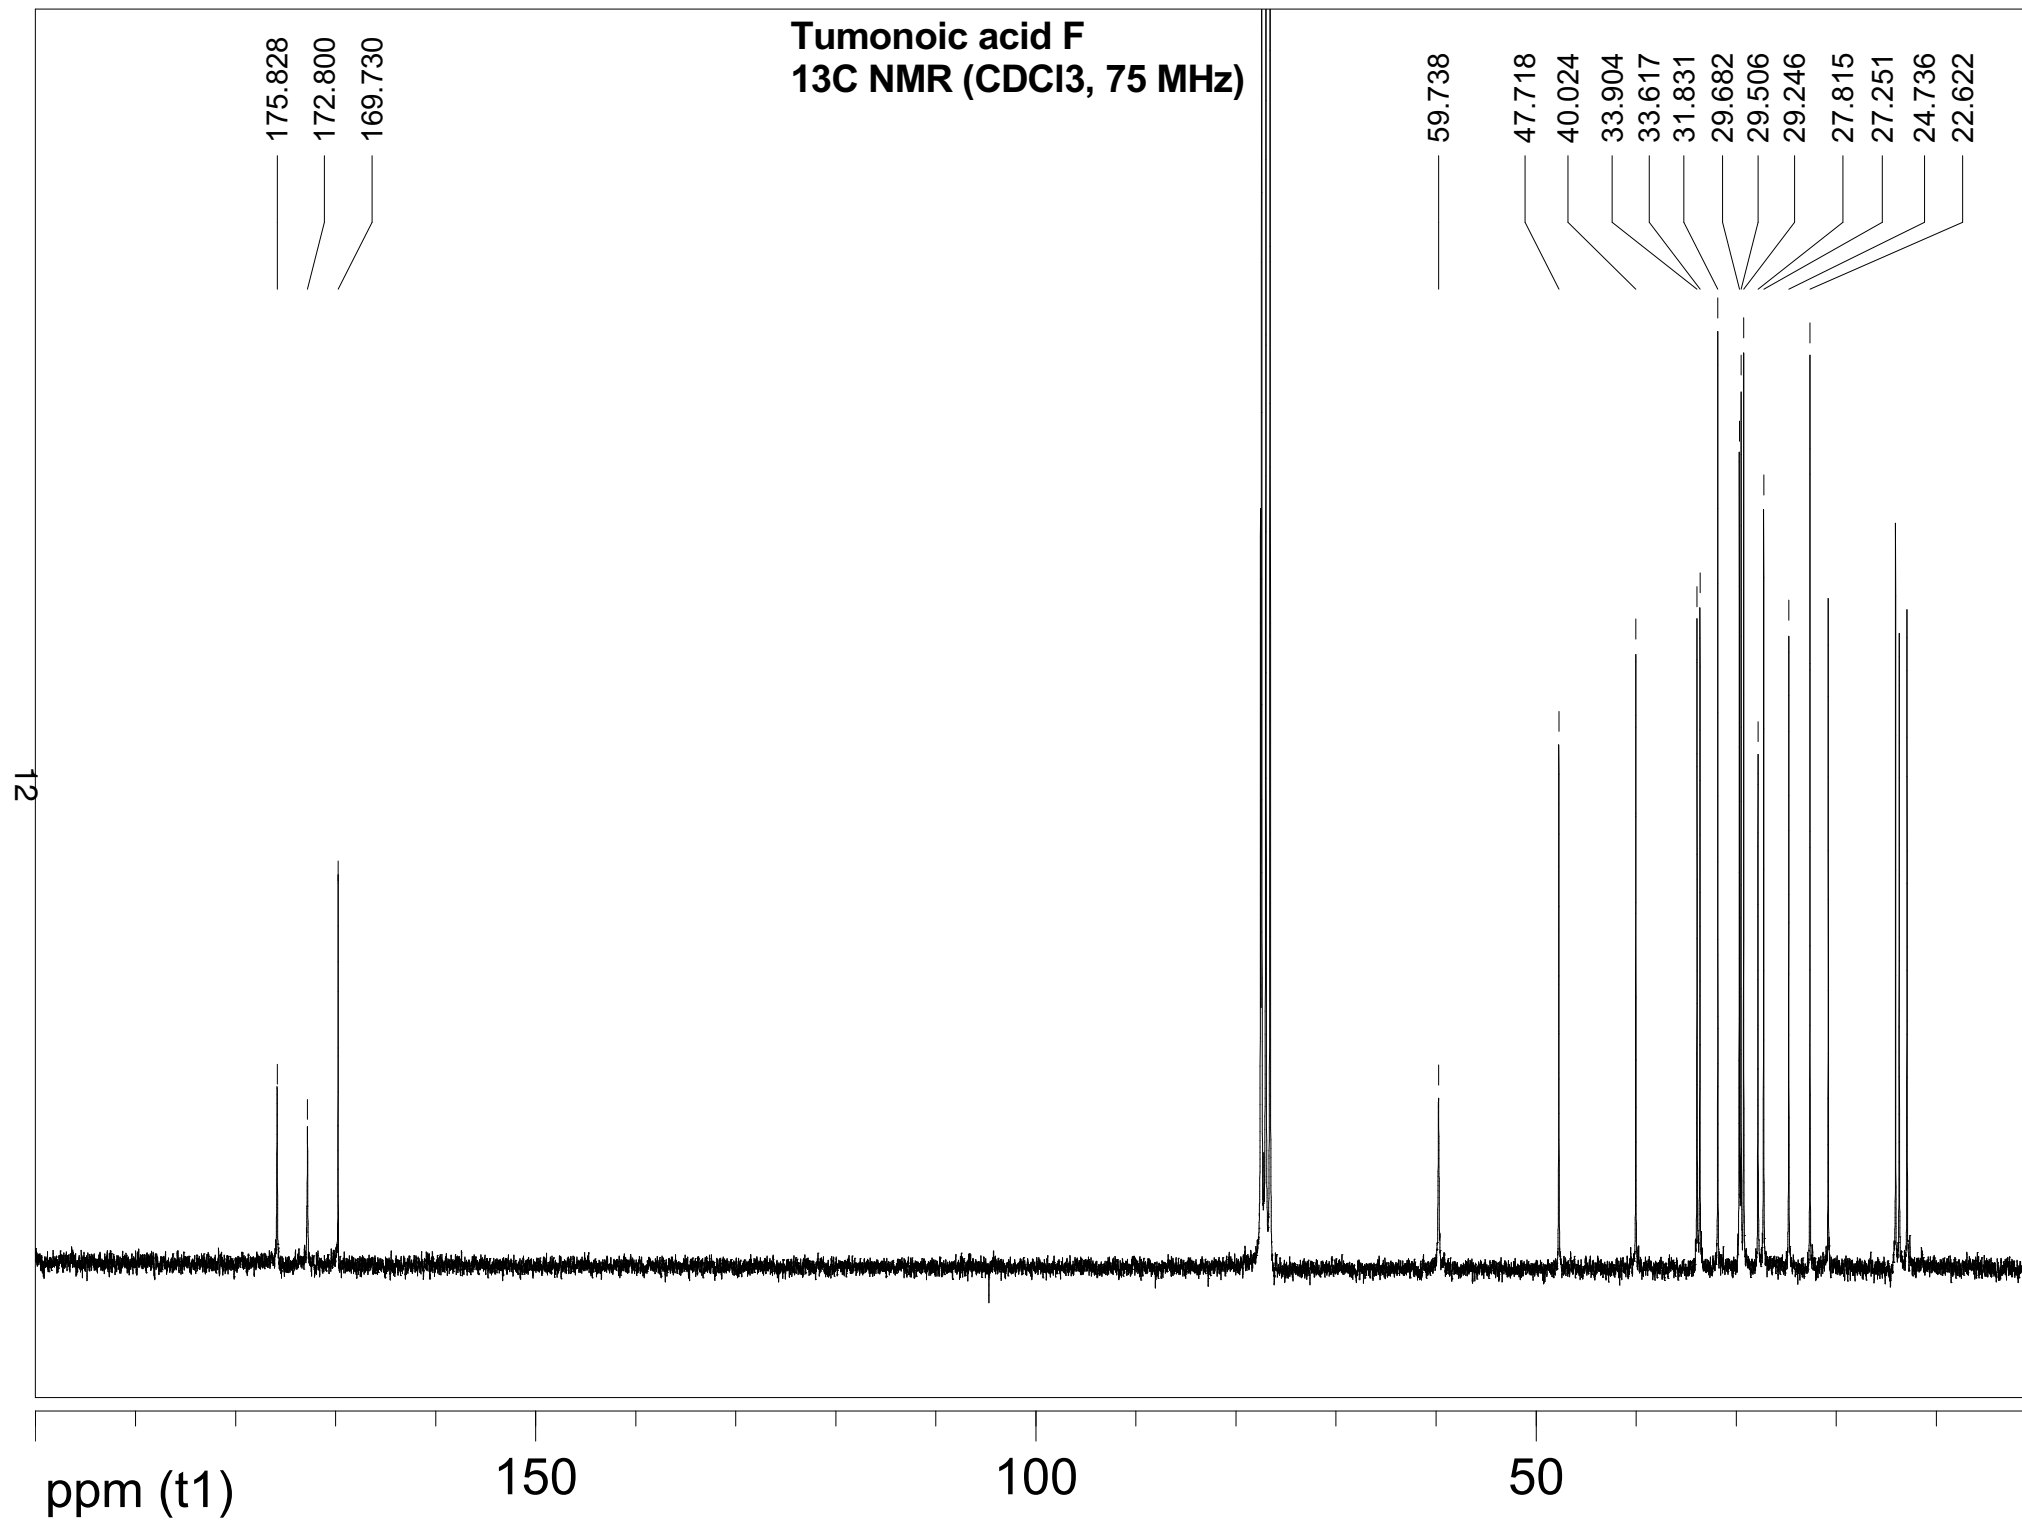

**Tumonoic acid F**  
**gCOSY (CDCl<sub>3</sub>, 500 MHz)**

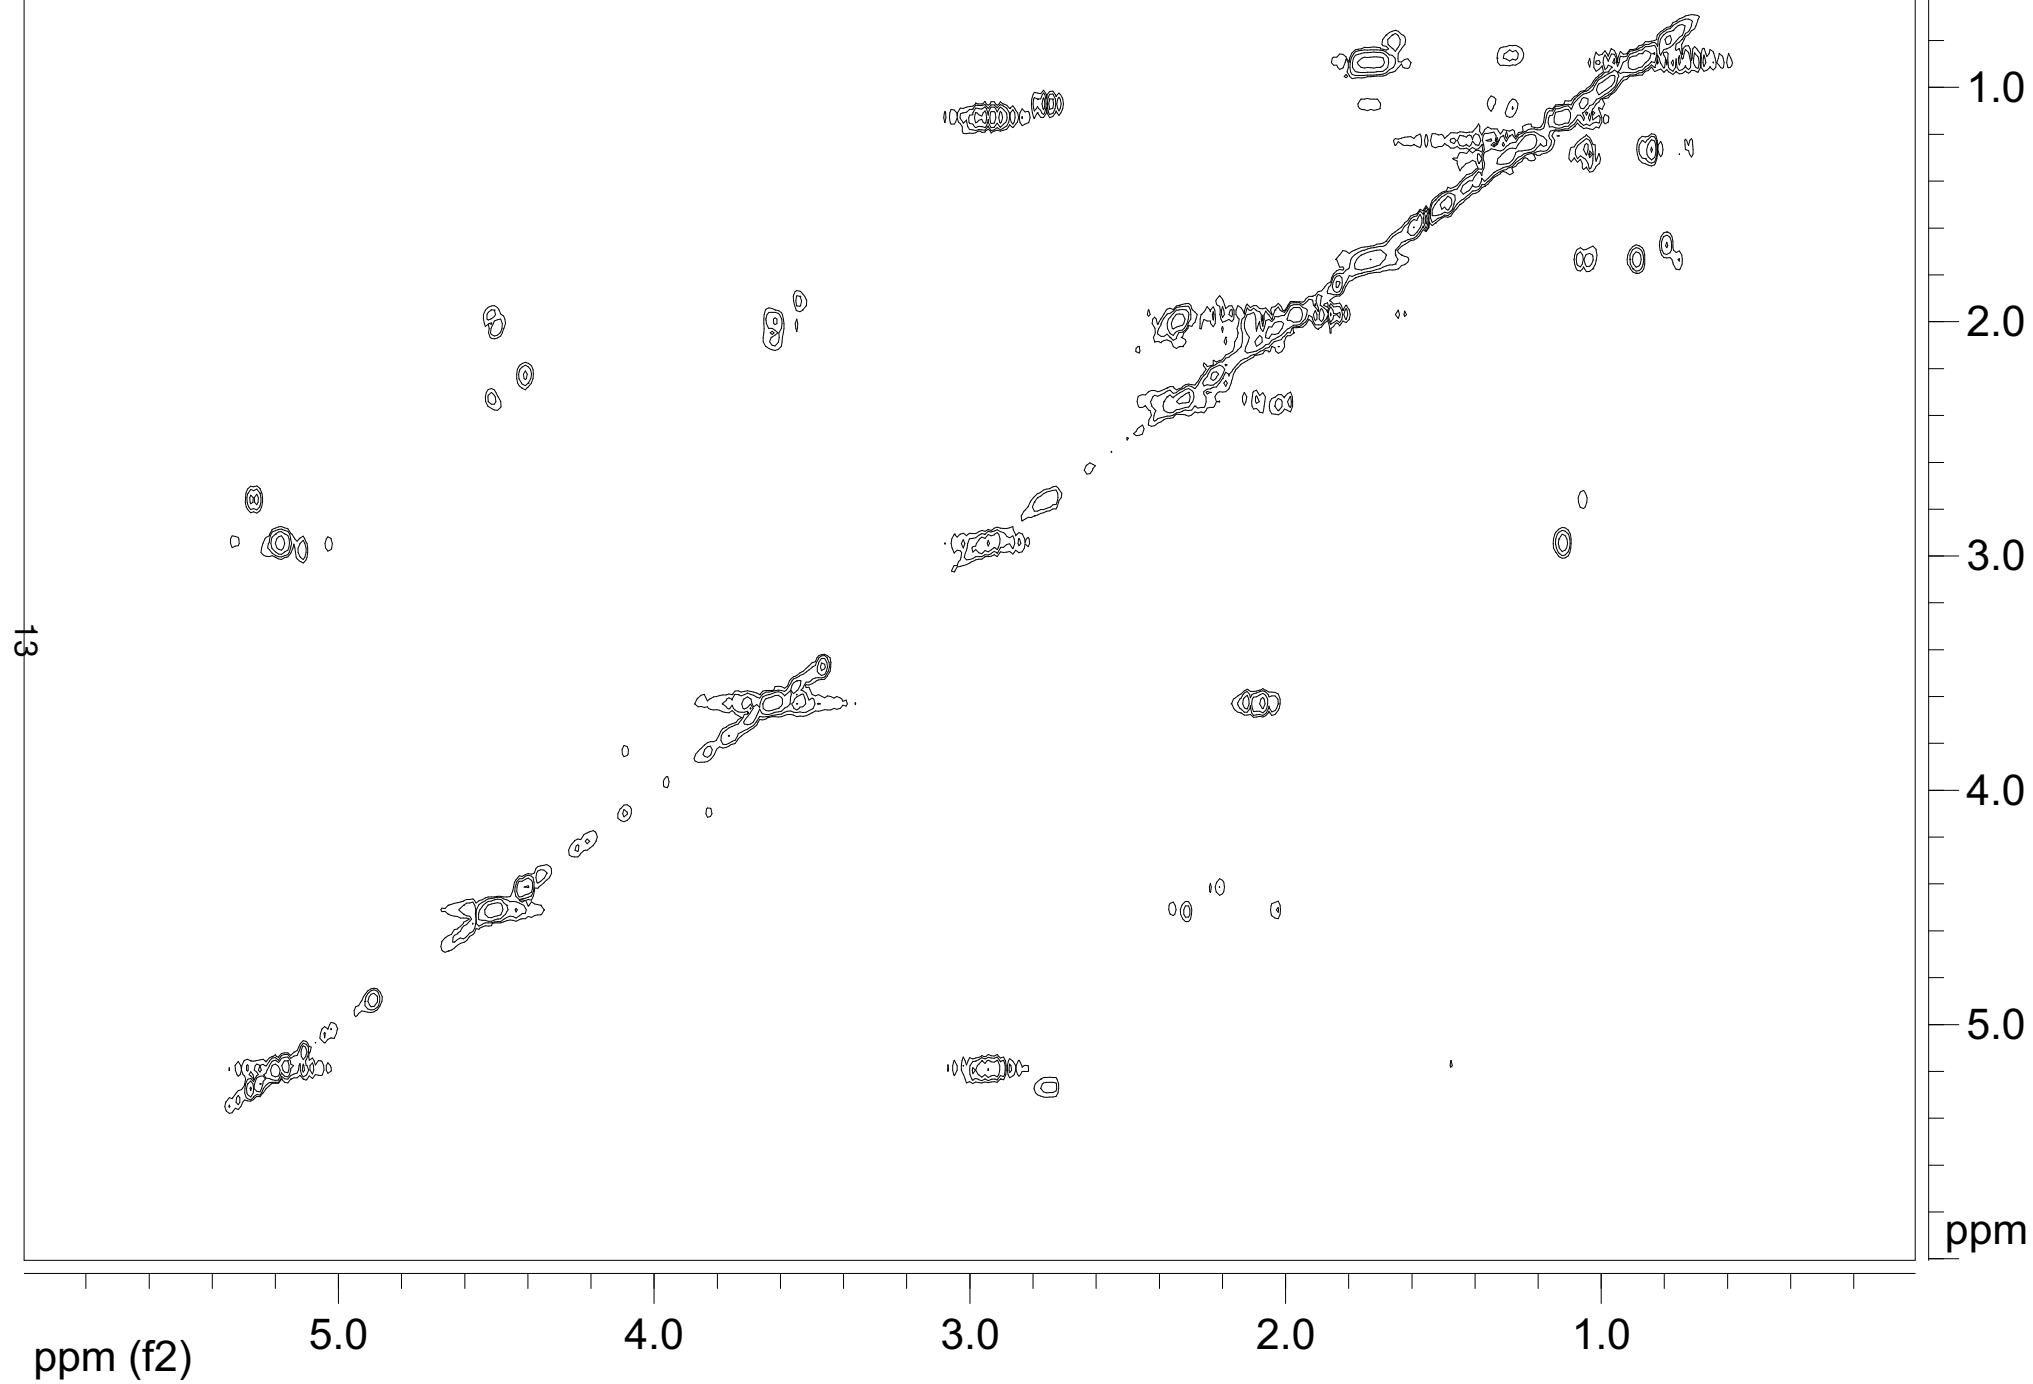

**Tumonoic acid F**  
**gHSQC (CDCl<sub>3</sub>, 500 MHz)**

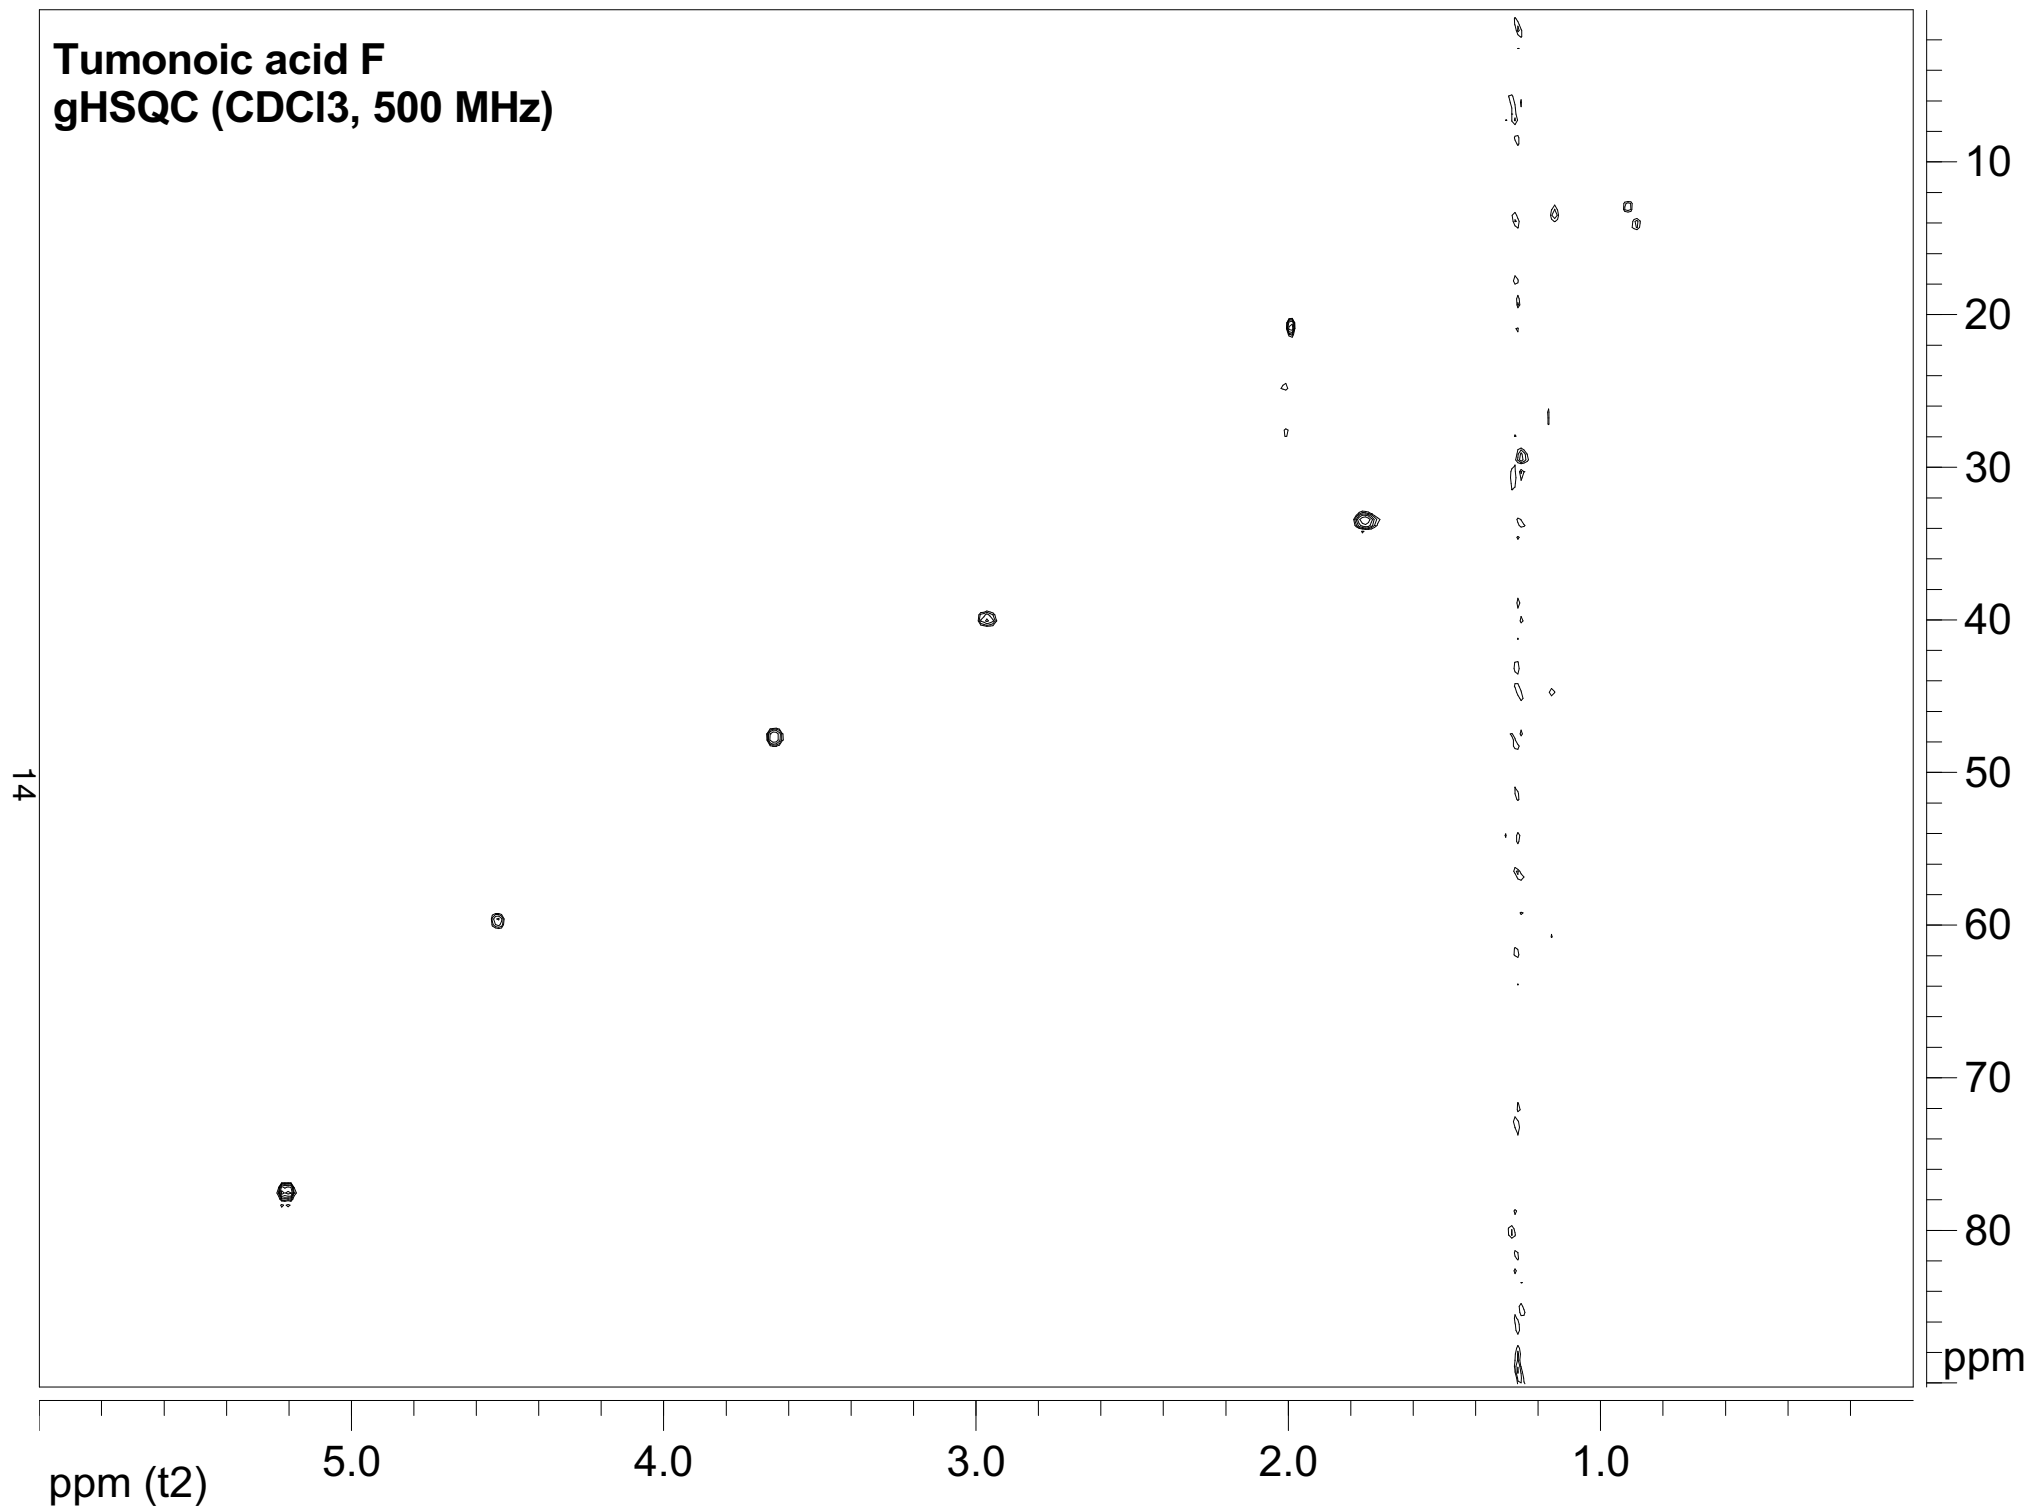



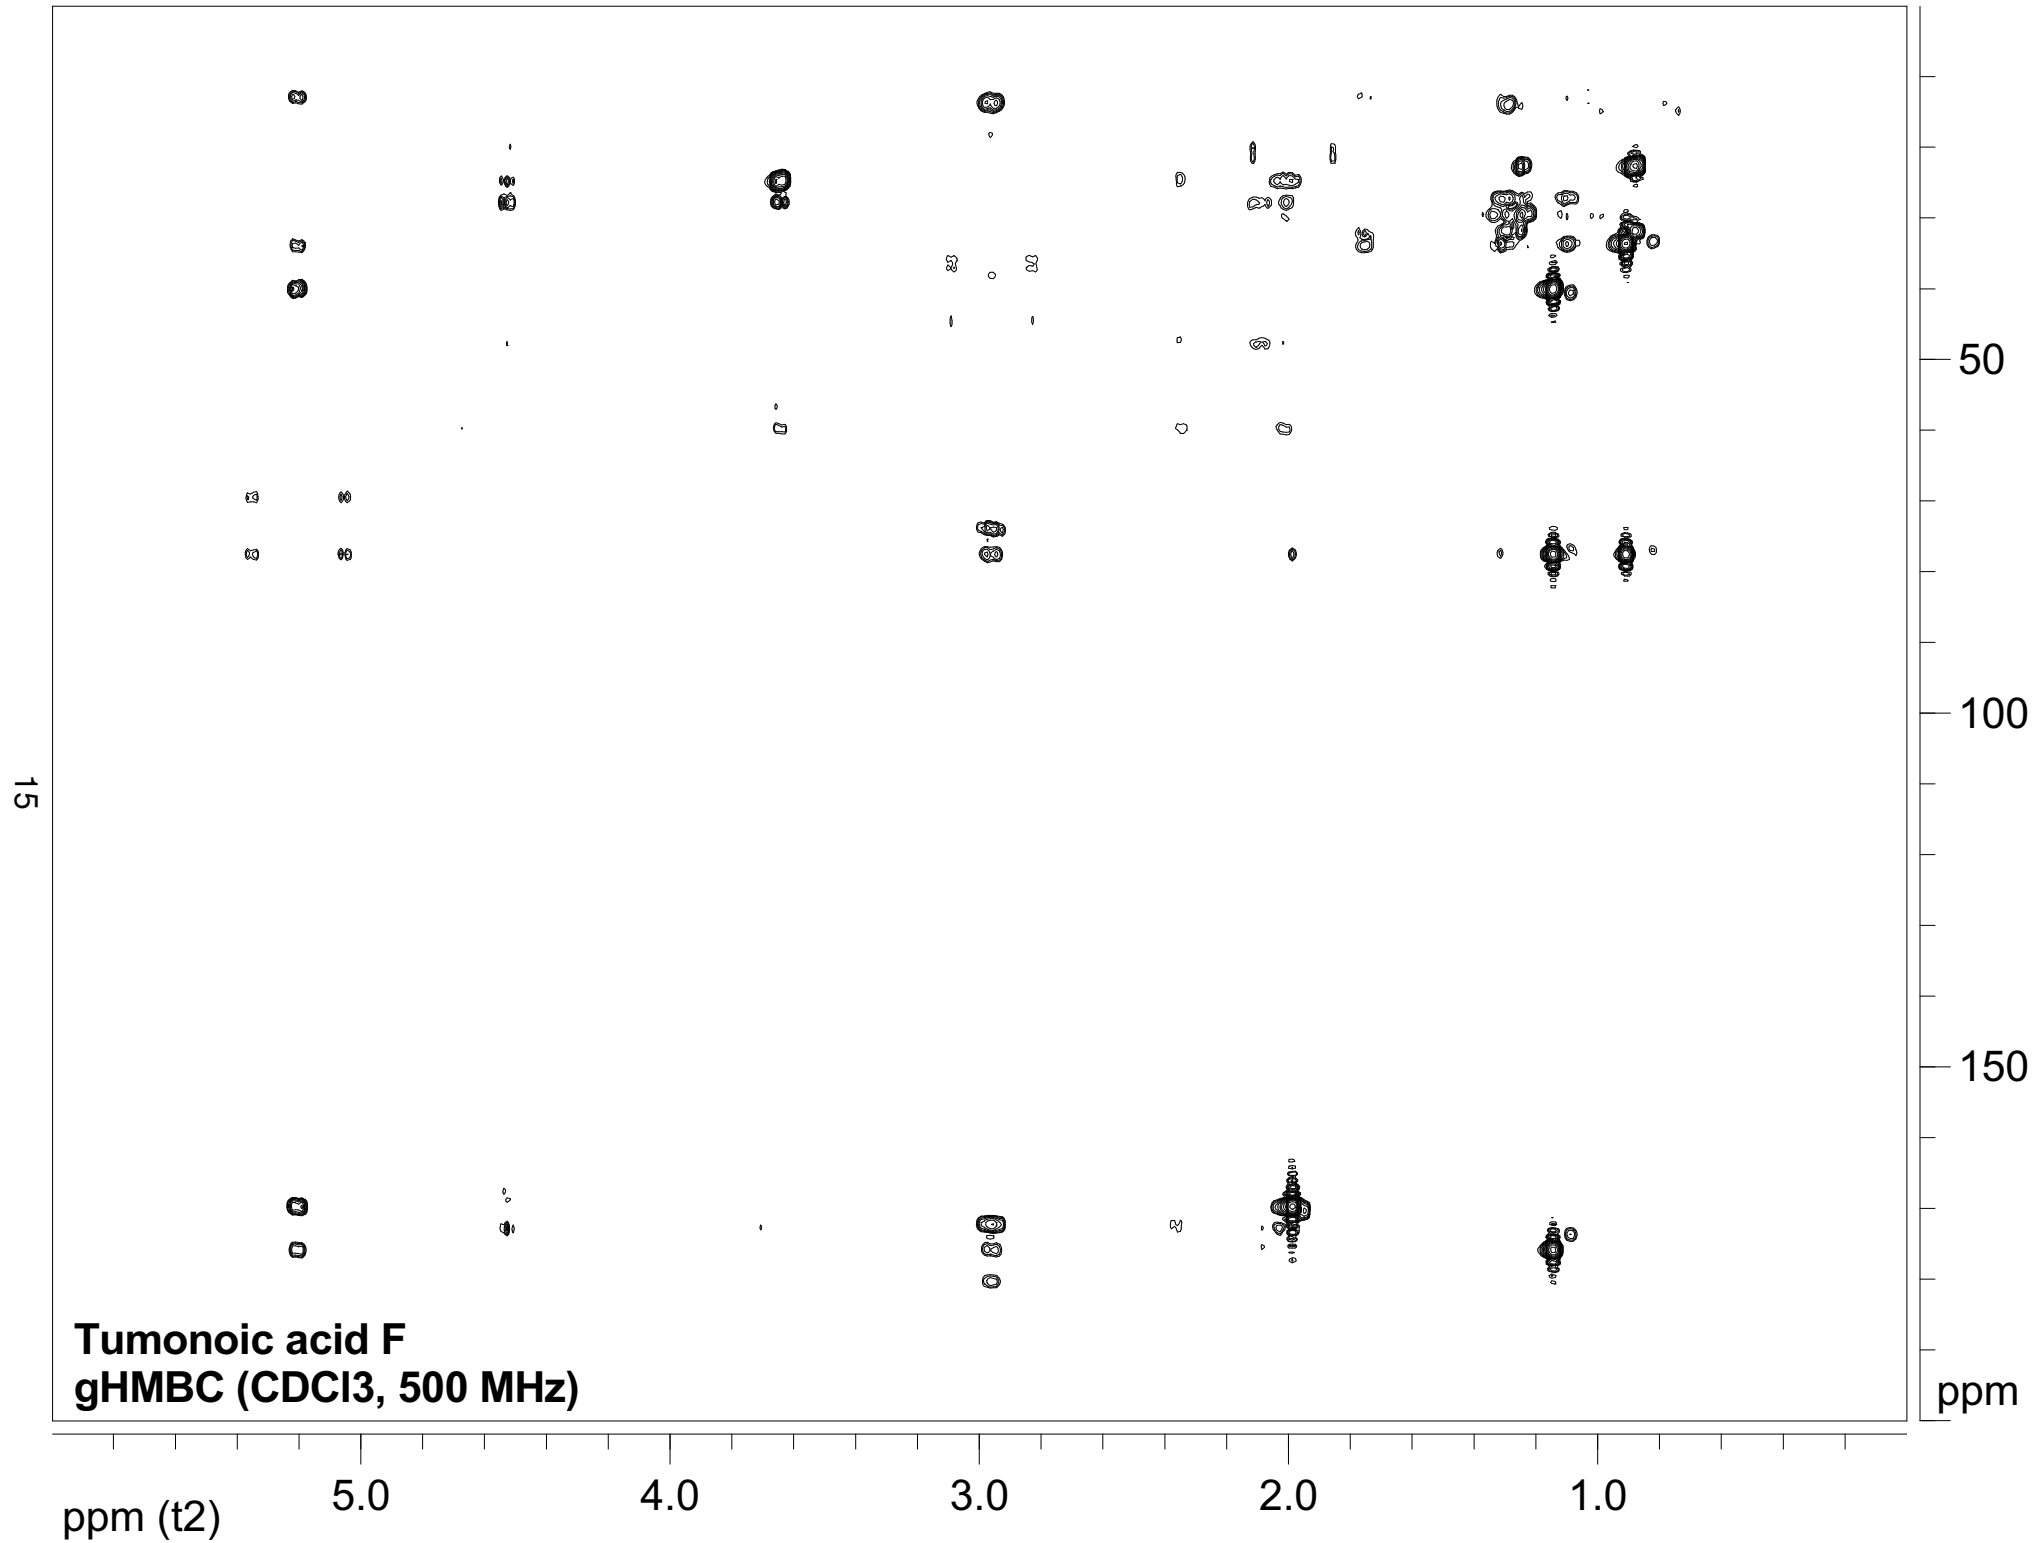

**Tumonoic acid G**  
**<sup>1</sup>H NMR (CDCl<sub>3</sub>, 500 MHz)**

16

ppm (f1)

5.0

4.0

3.0

2.0

1.0

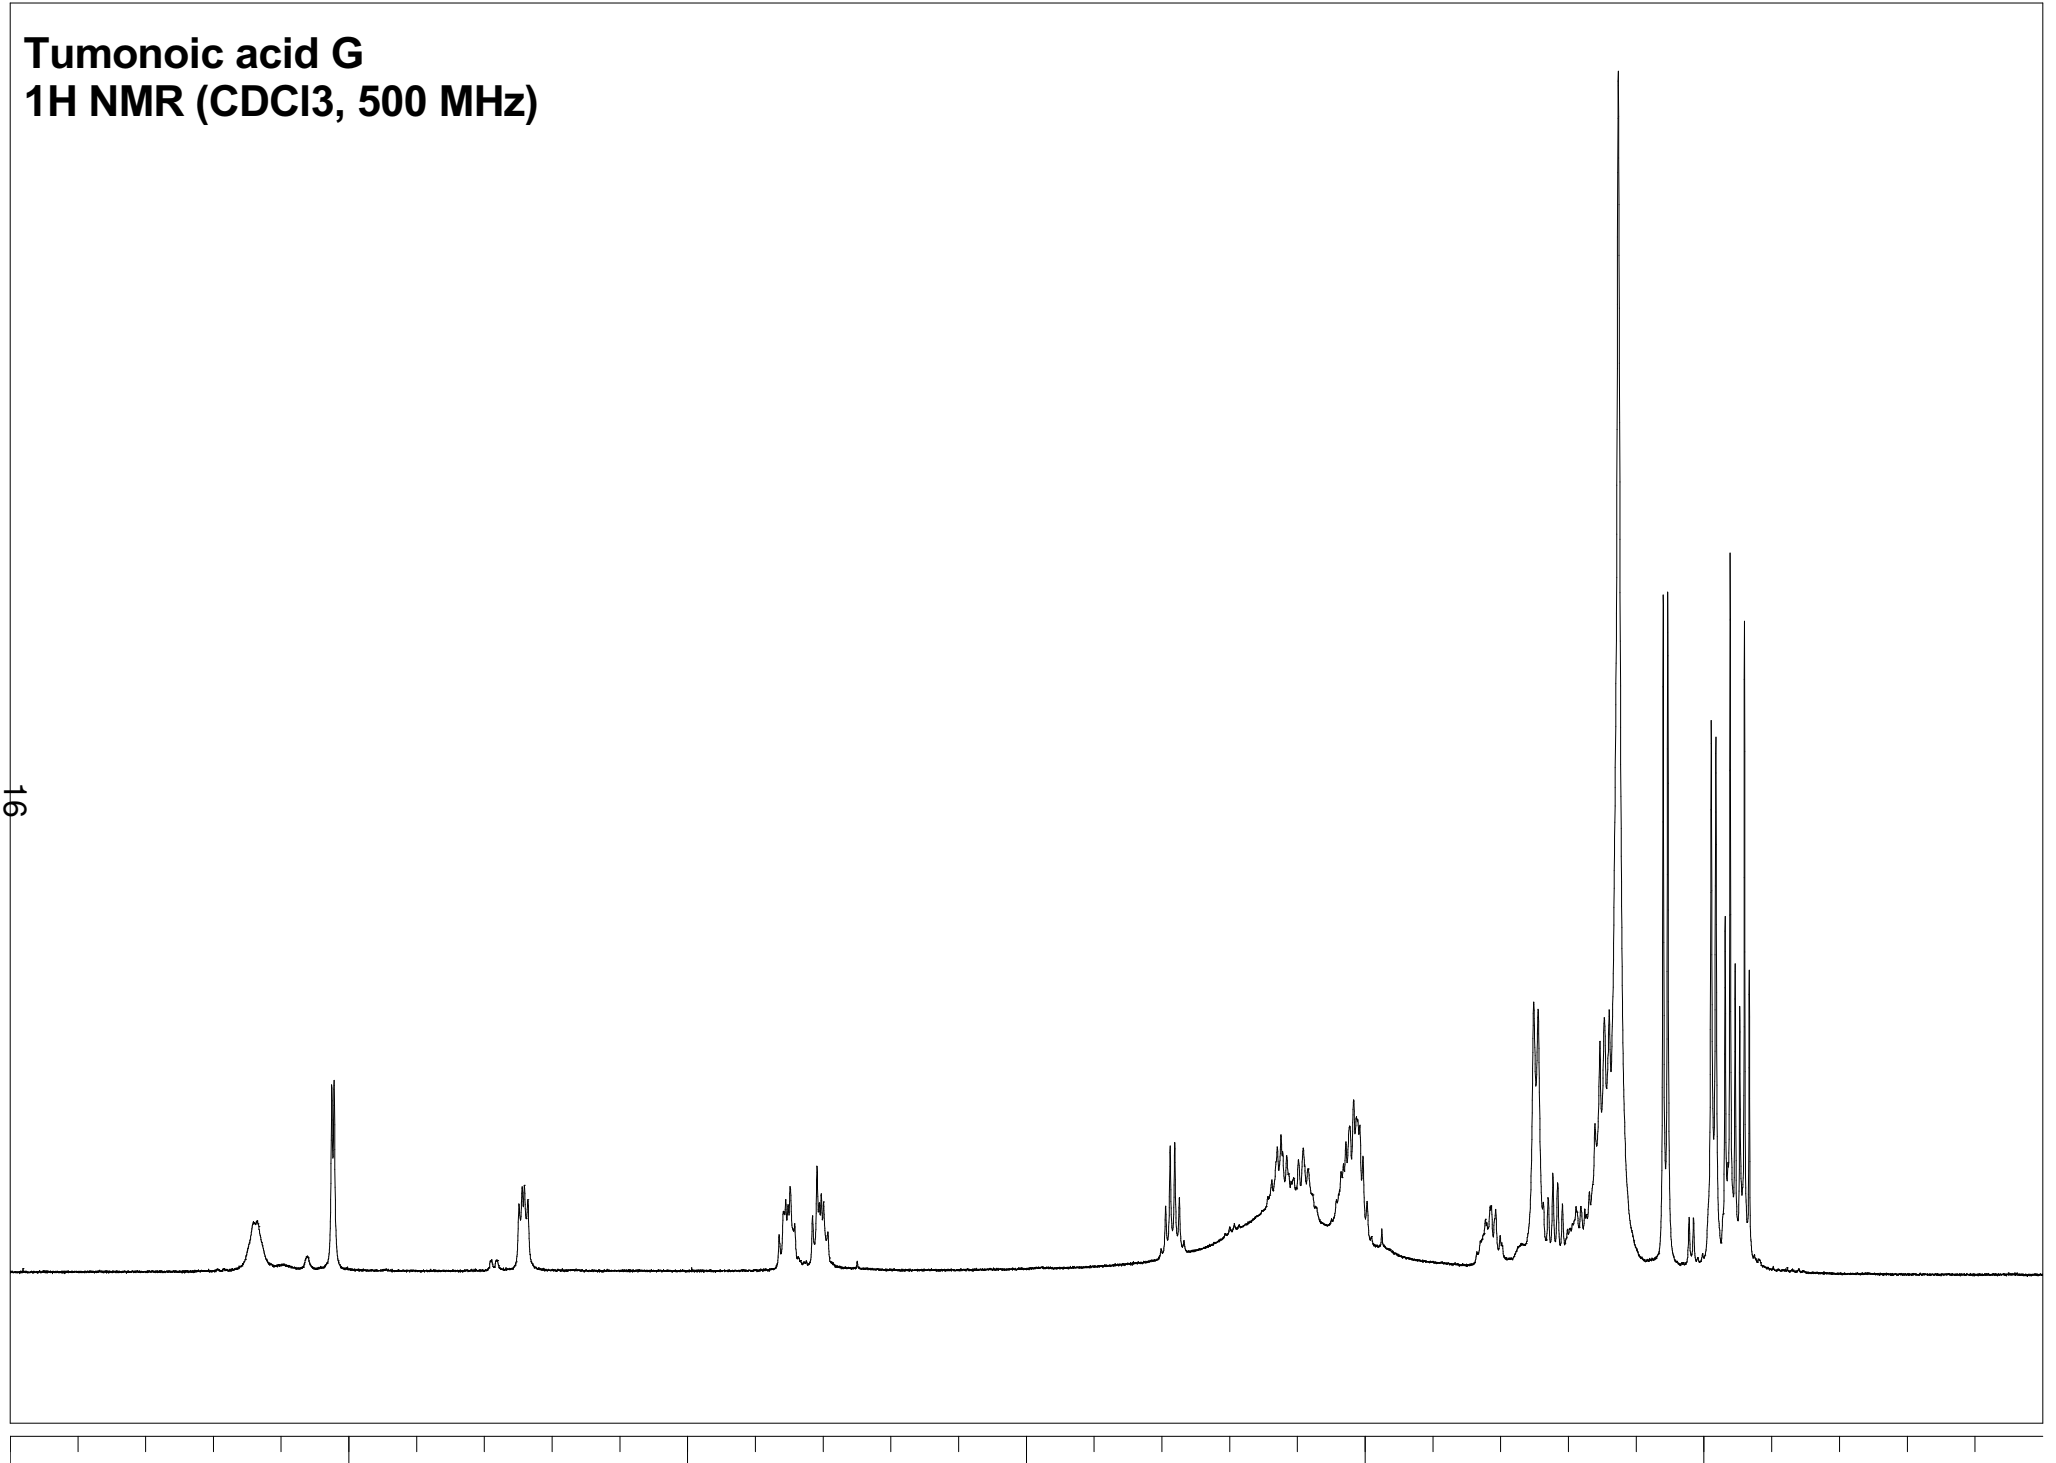

**Tumonoic acid G**  
**<sup>13</sup>C NMR (CDCl<sub>3</sub>, 125 MHz)**

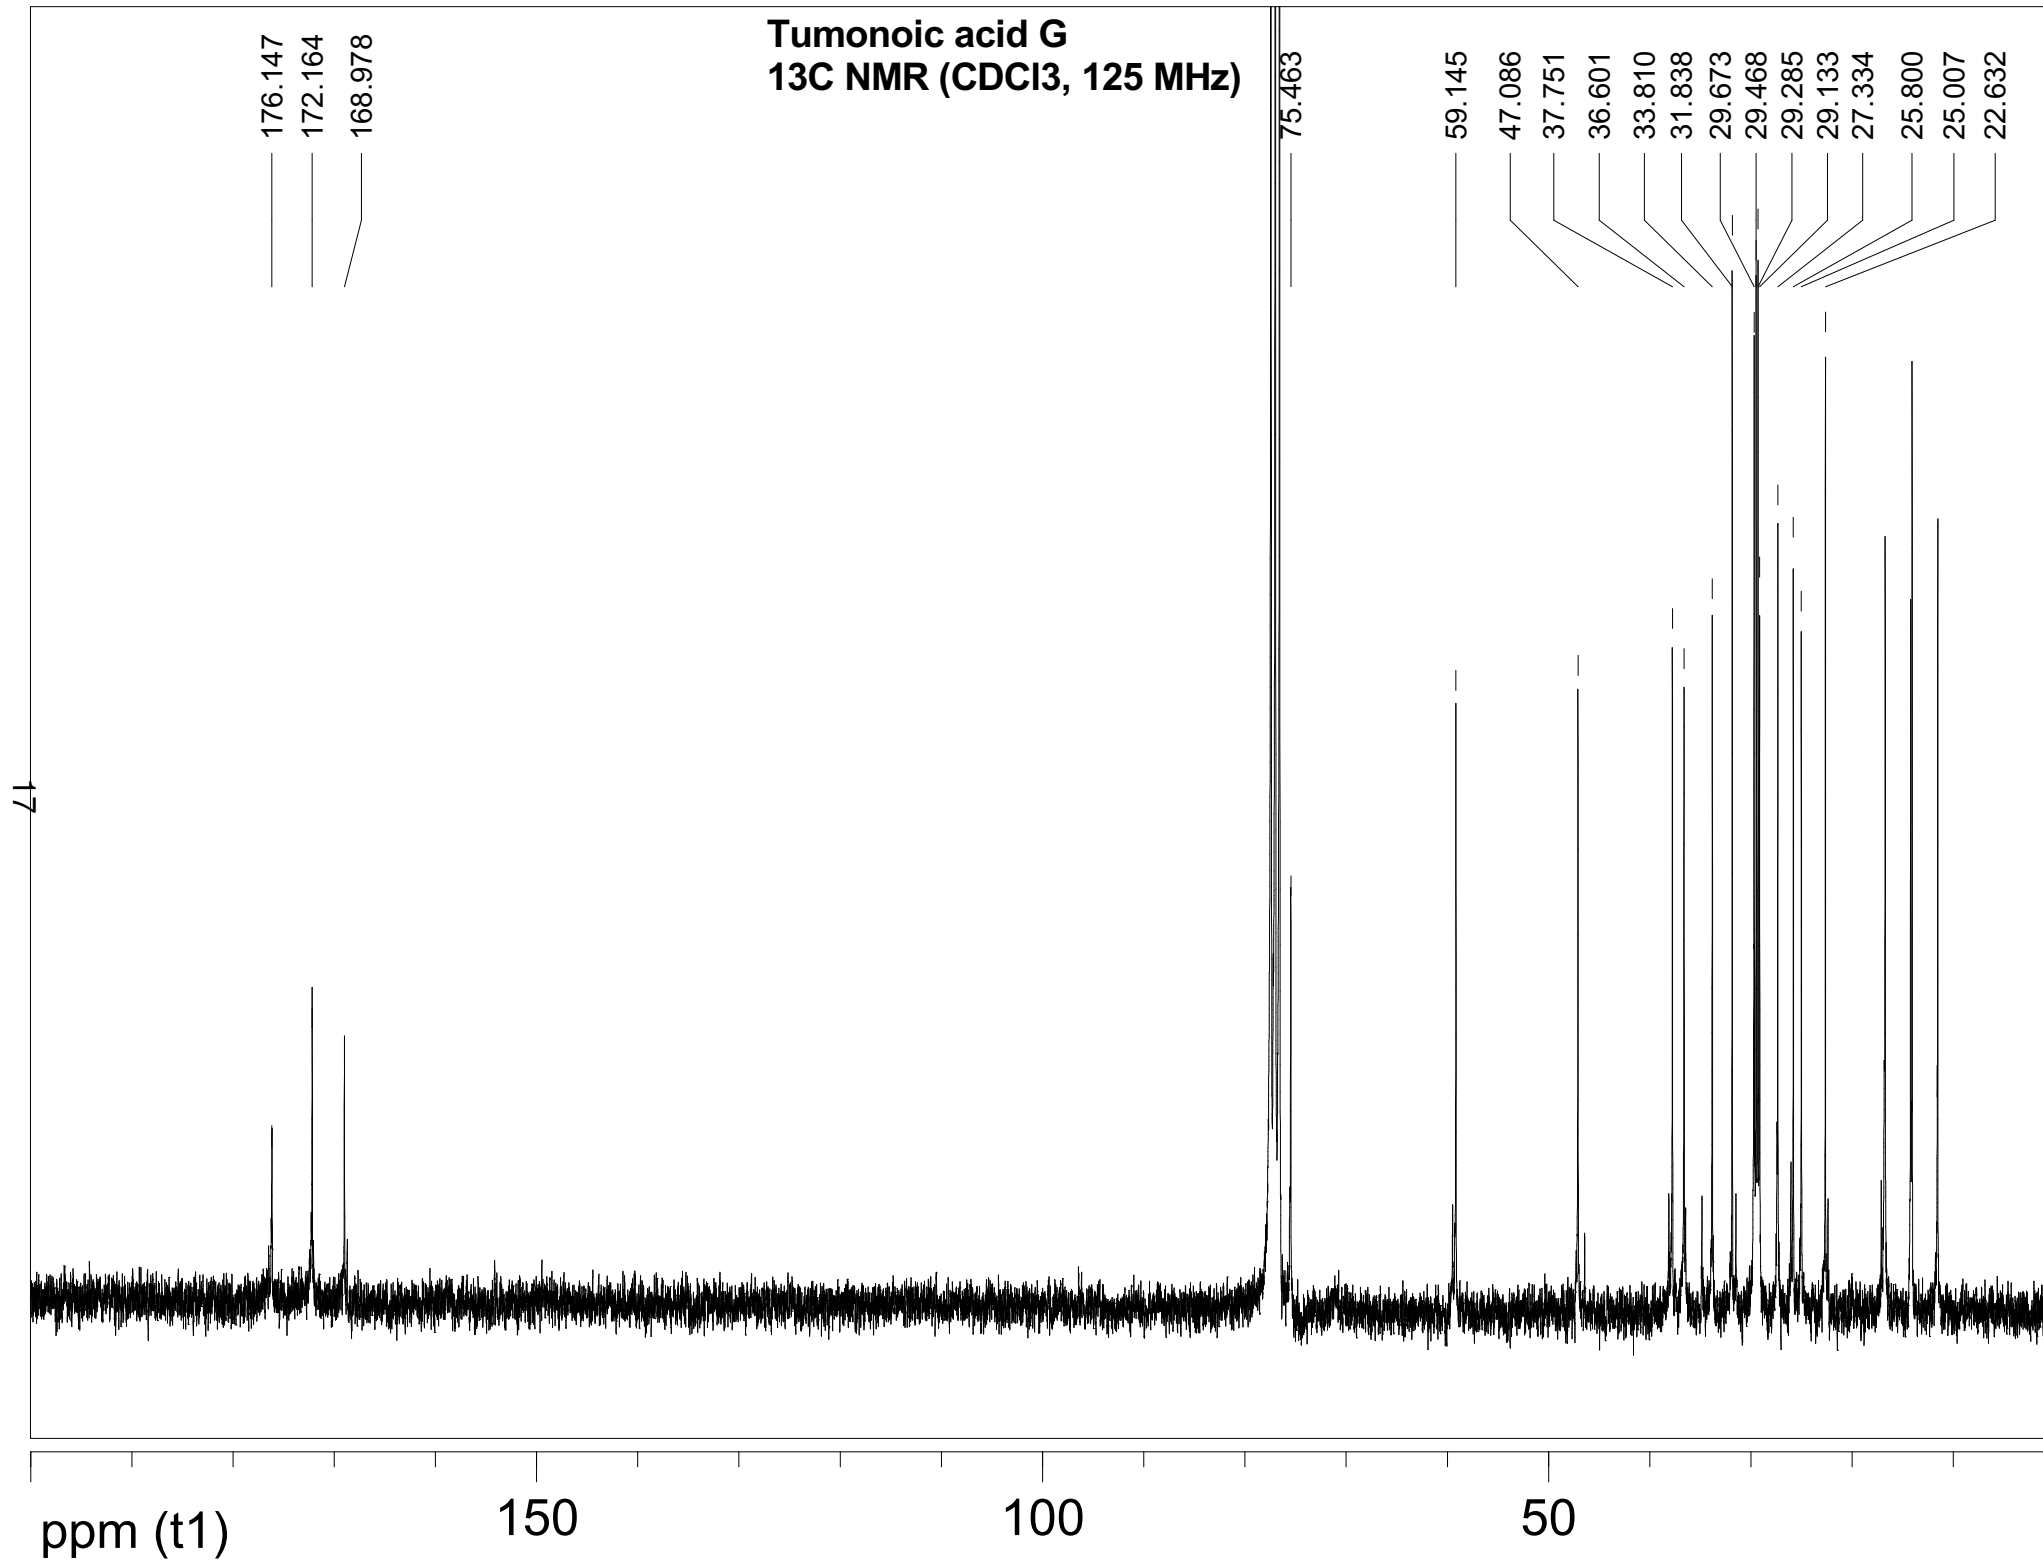

**Tumonoic acid G**  
**gCOSY (CDCl<sub>3</sub>, 500 MHz)**

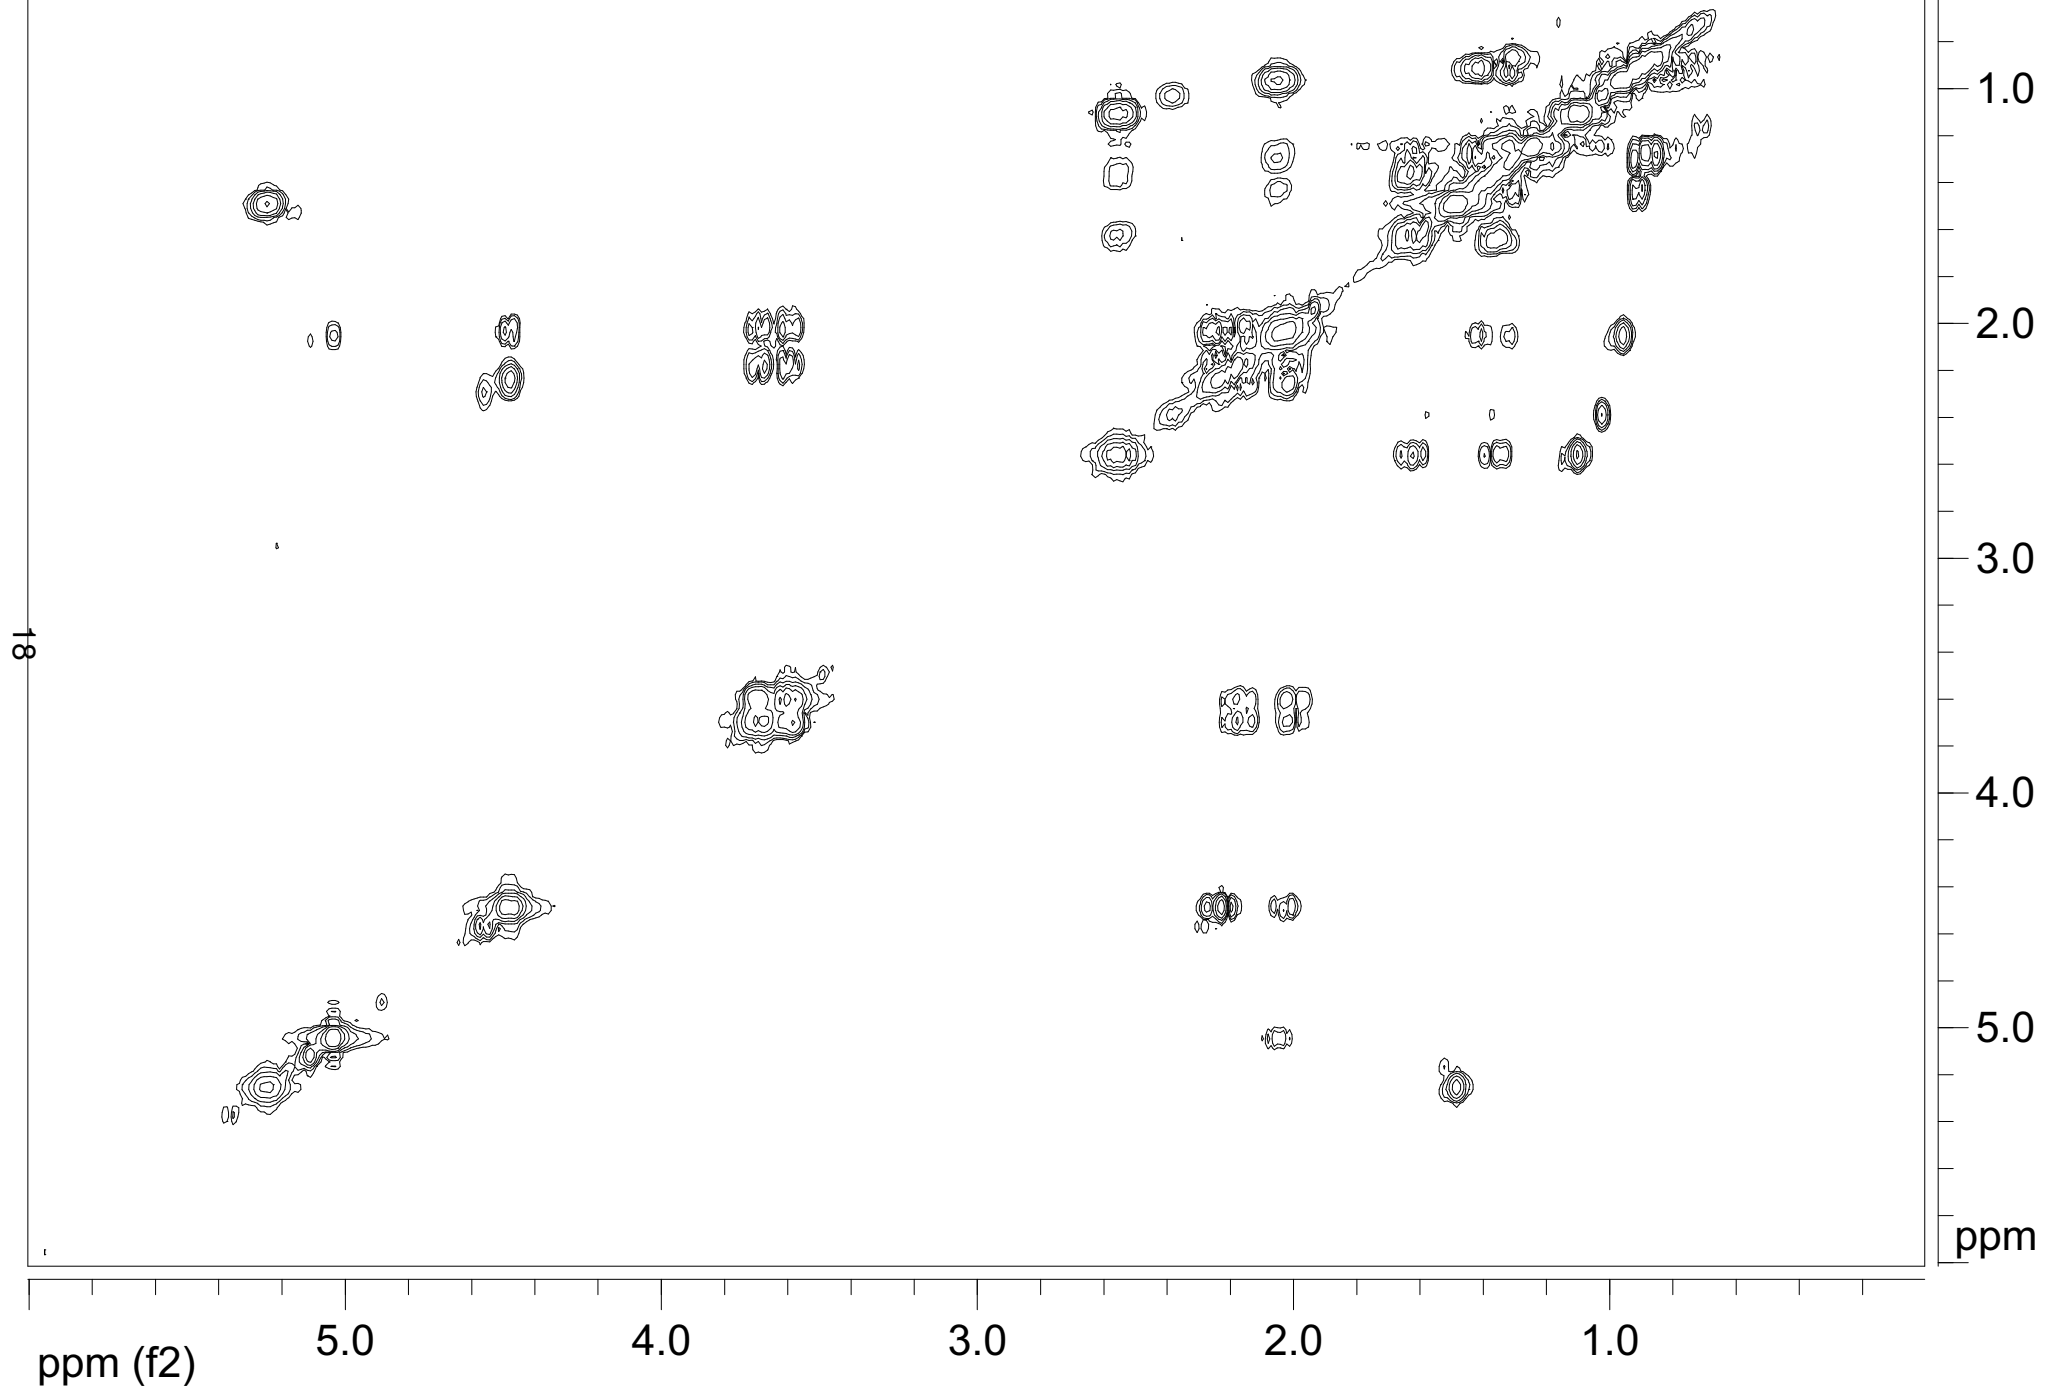

**Tumonoic acid G**  
**gHSQC (CDCl<sub>3</sub>, 500 MHz)**

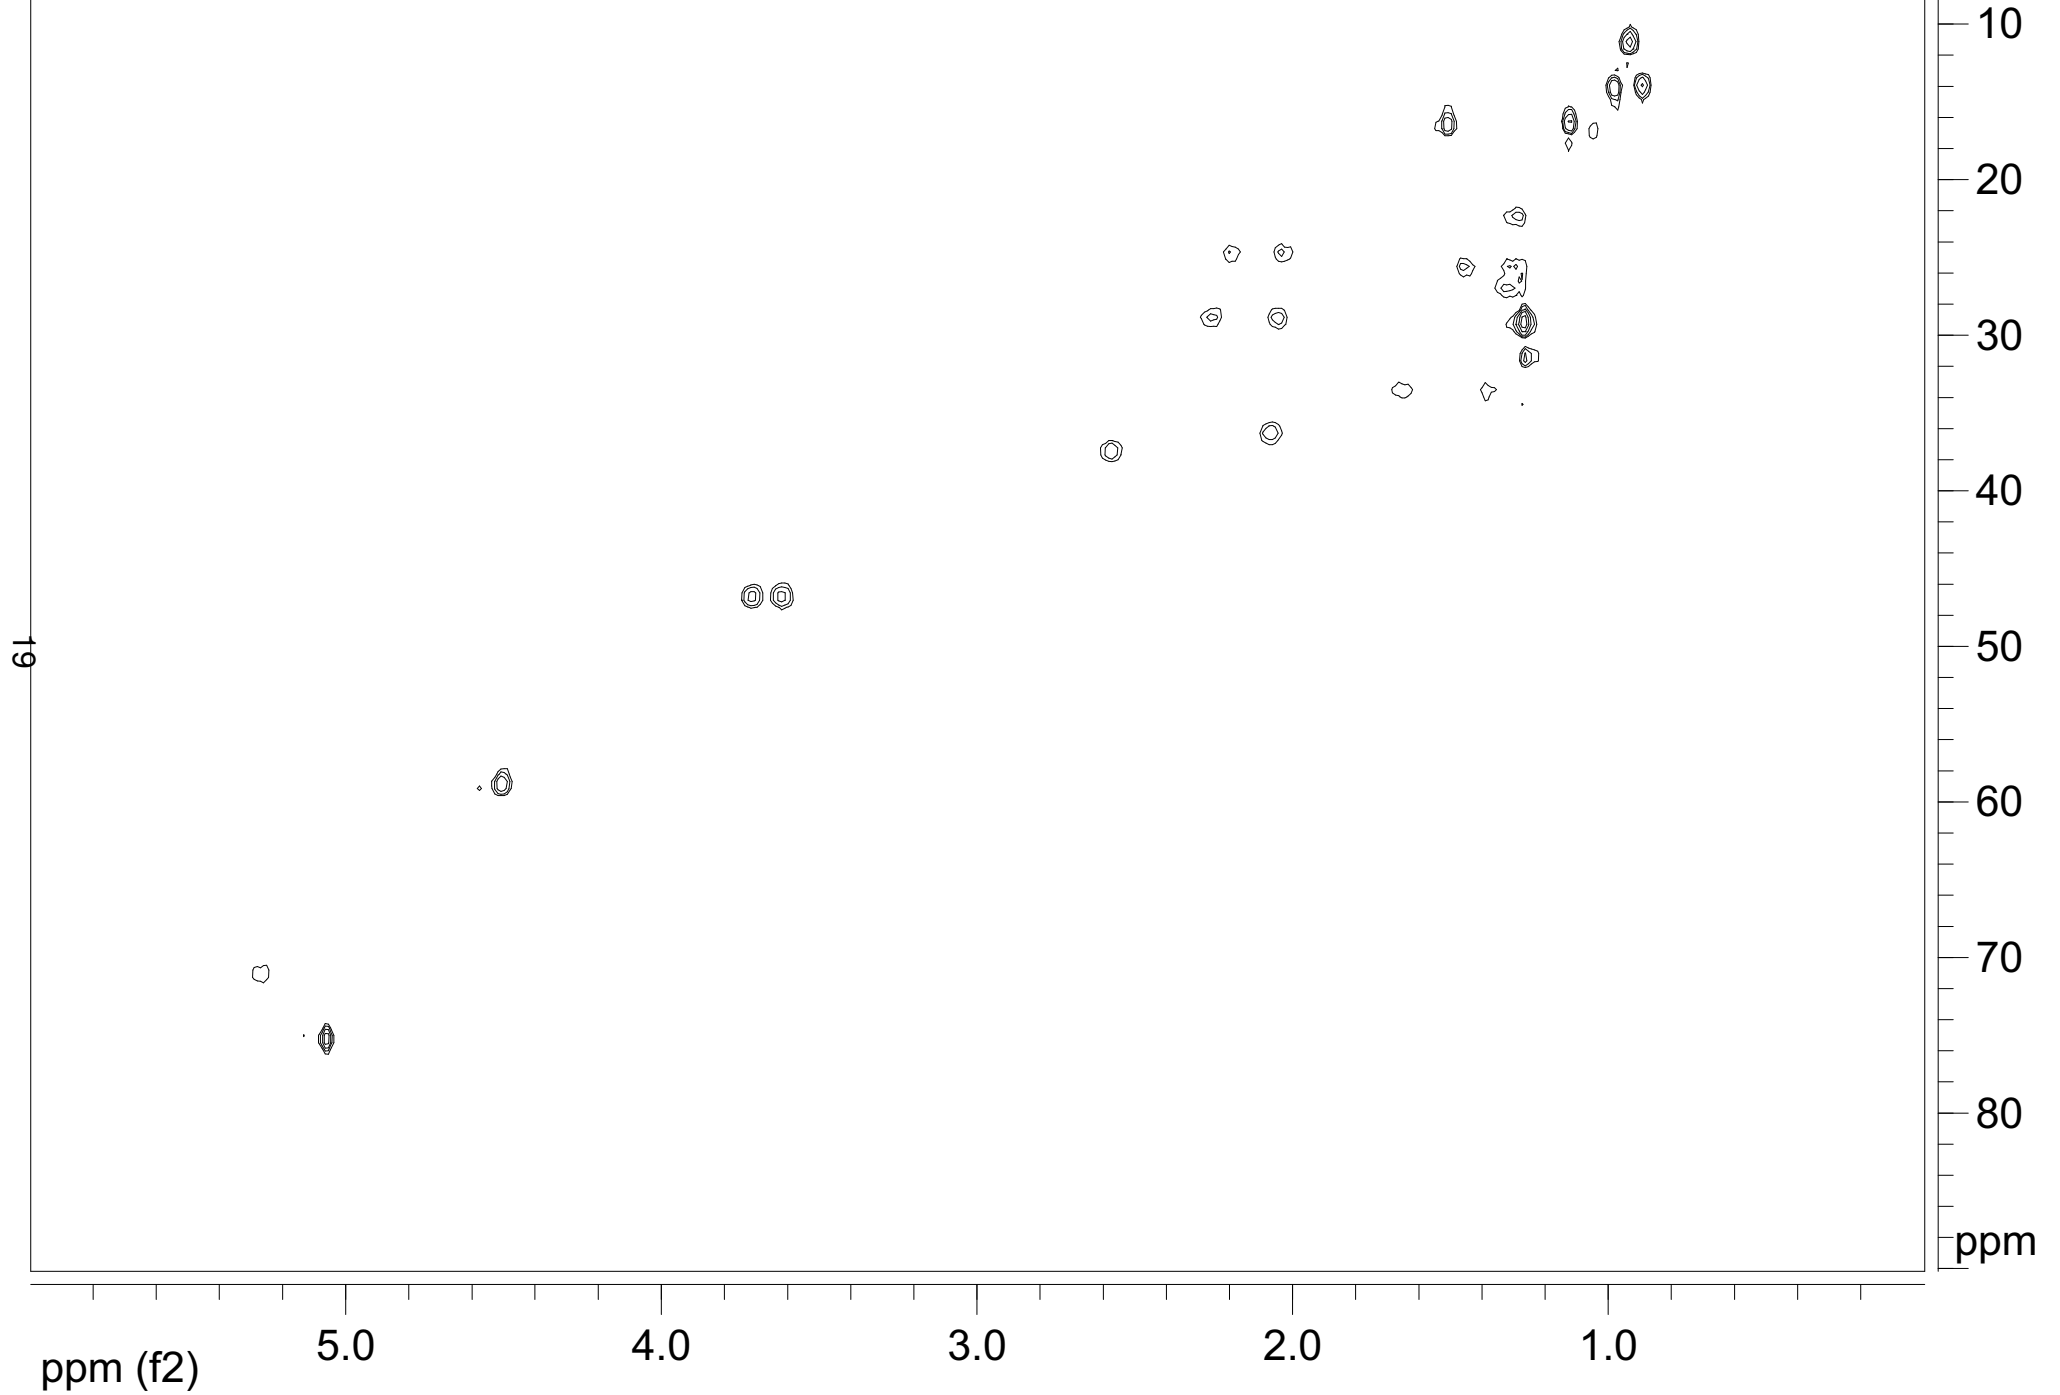

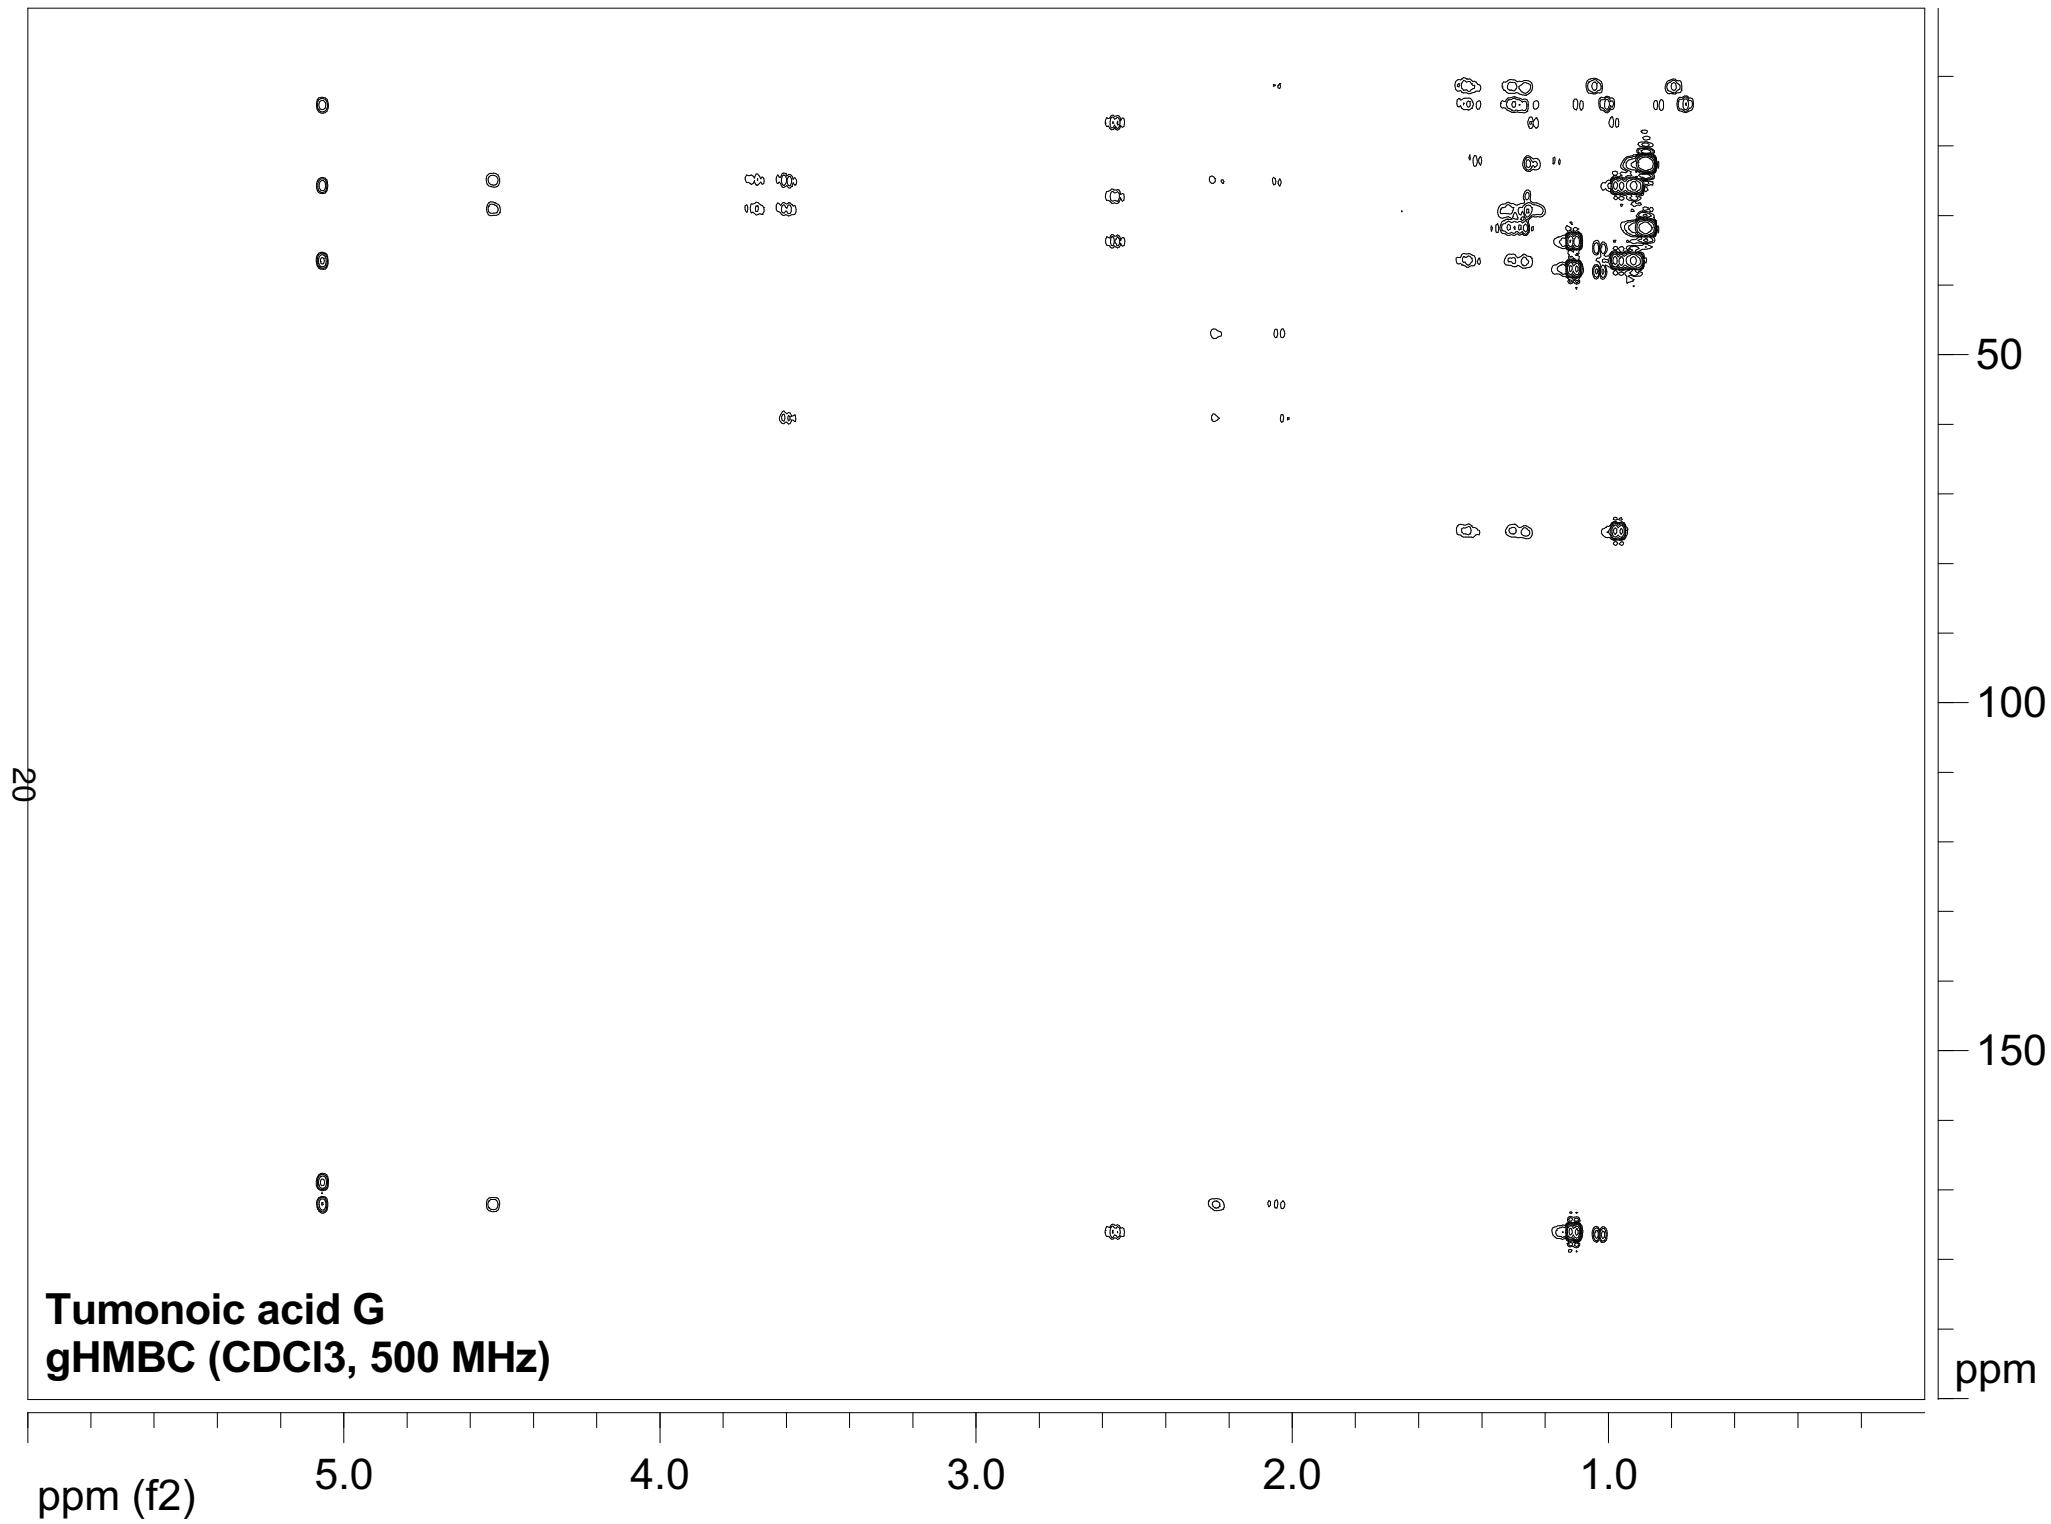

**Tumonoic acid H**  
**<sup>1</sup>H NMR (CDCl<sub>3</sub>, 500 MHz)**

21

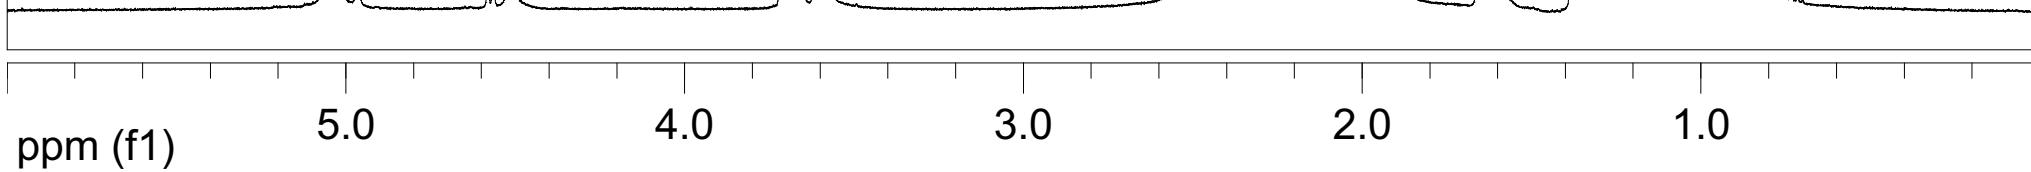

**Tumonoic acid H**  
**<sup>13</sup>C NMR (CDCl<sub>3</sub>, 75 MHz)**

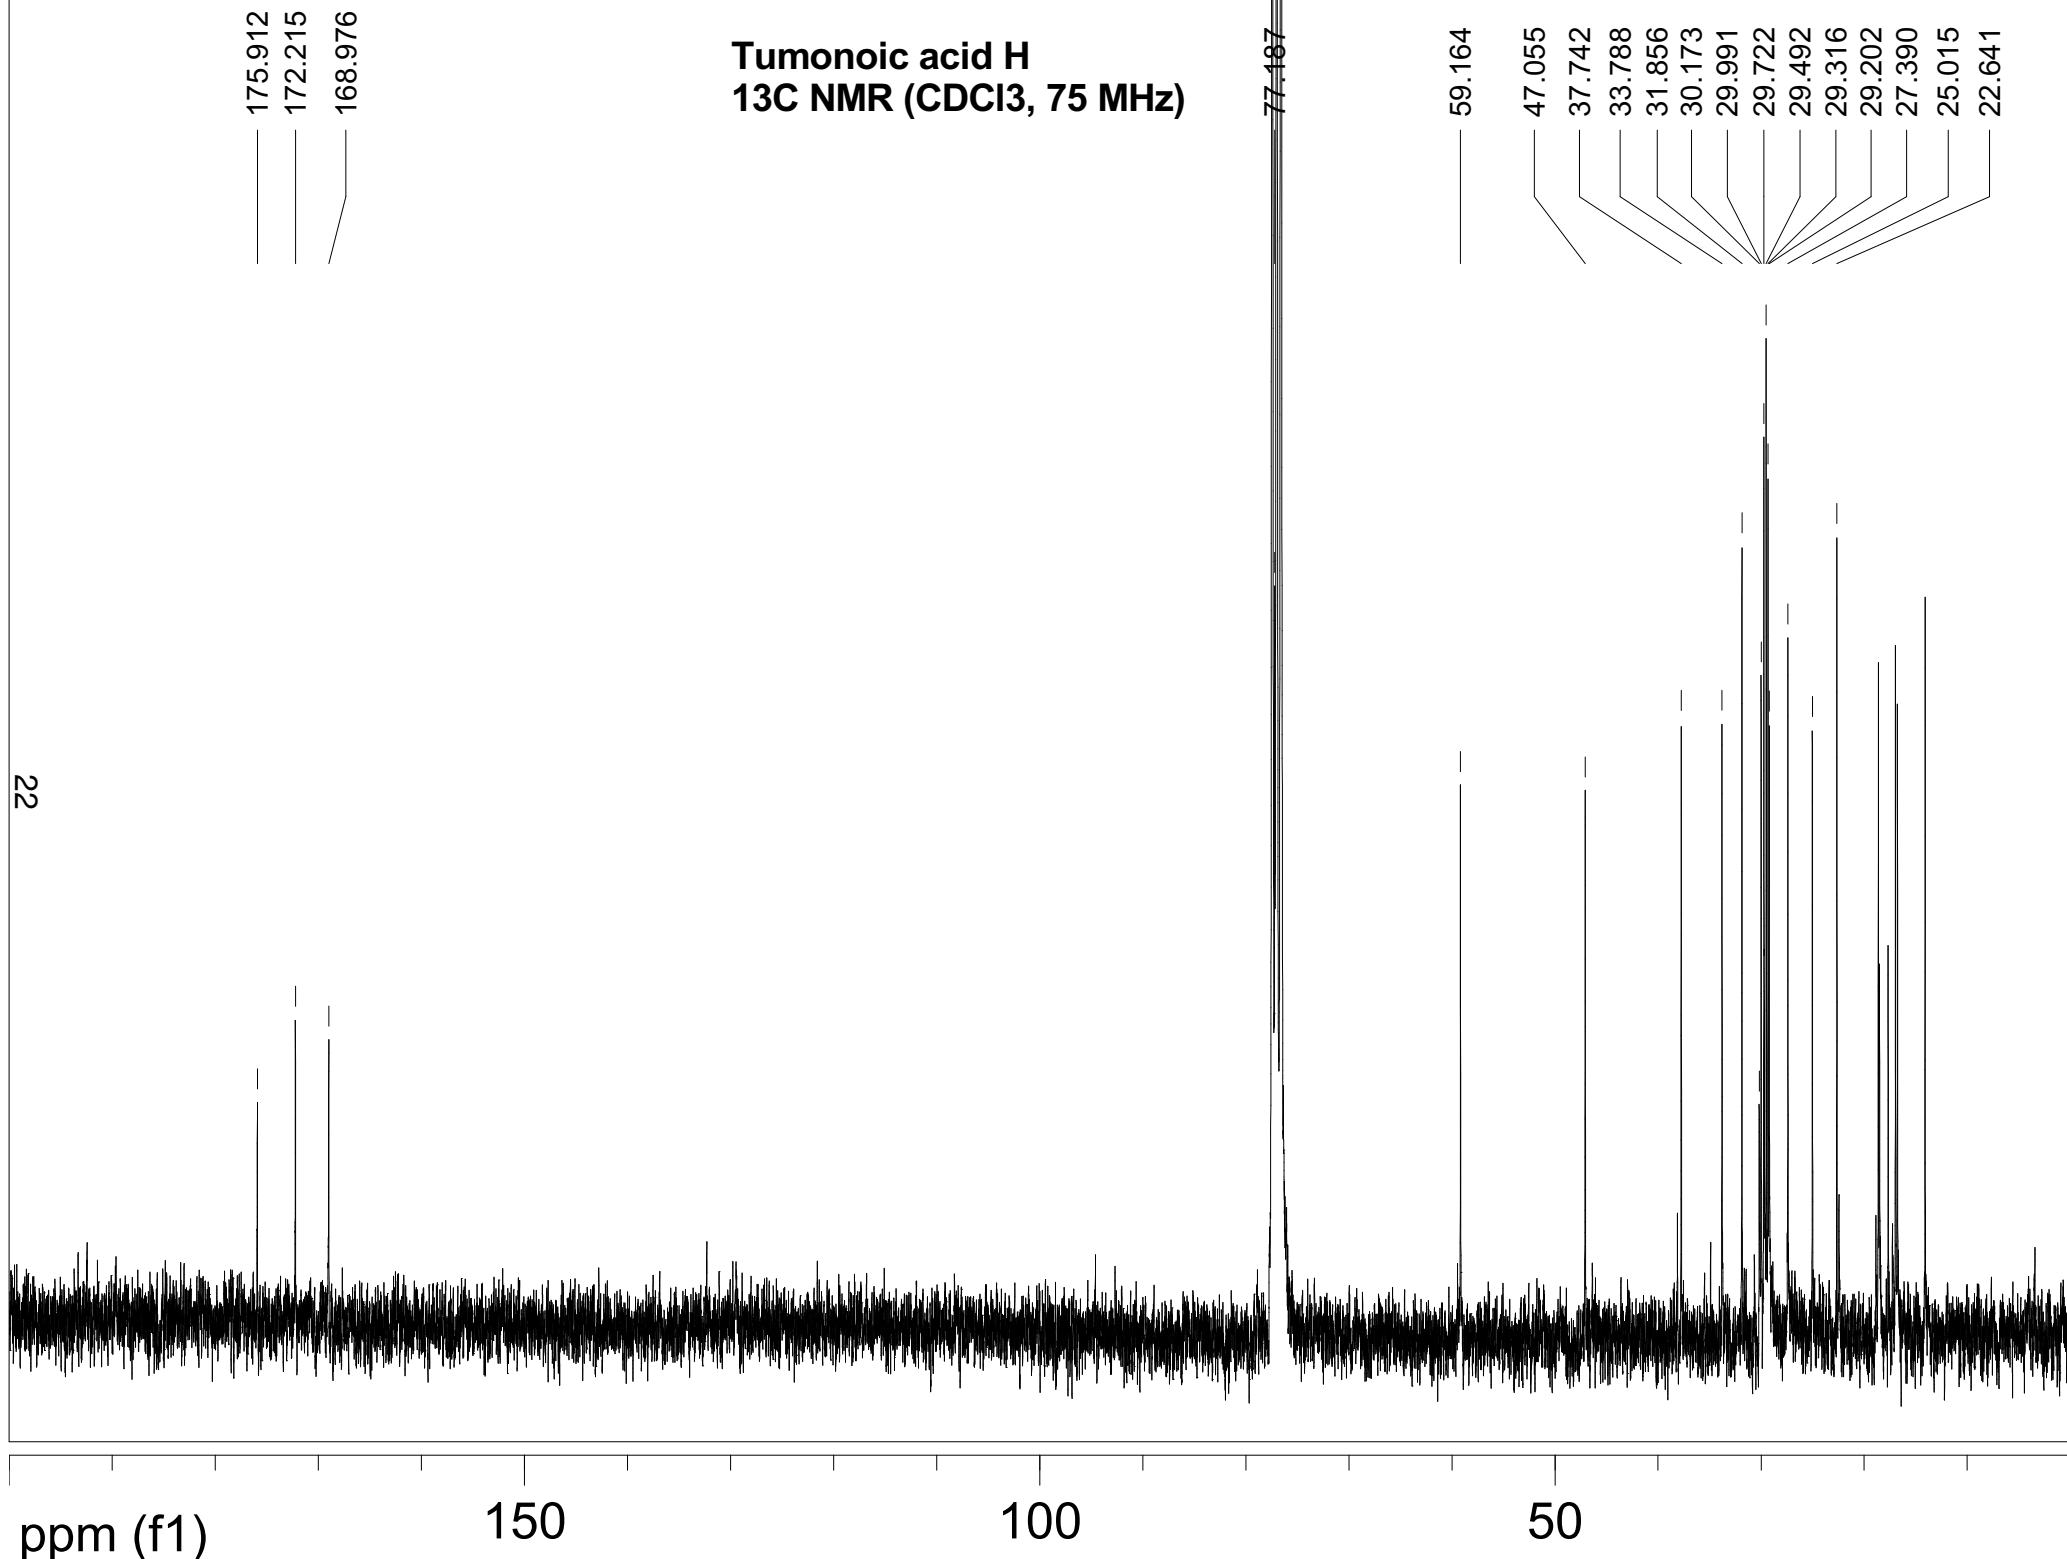



**Tumonoic acid H**  
**gCOSY (CDCl<sub>3</sub>, 500 MHz)**

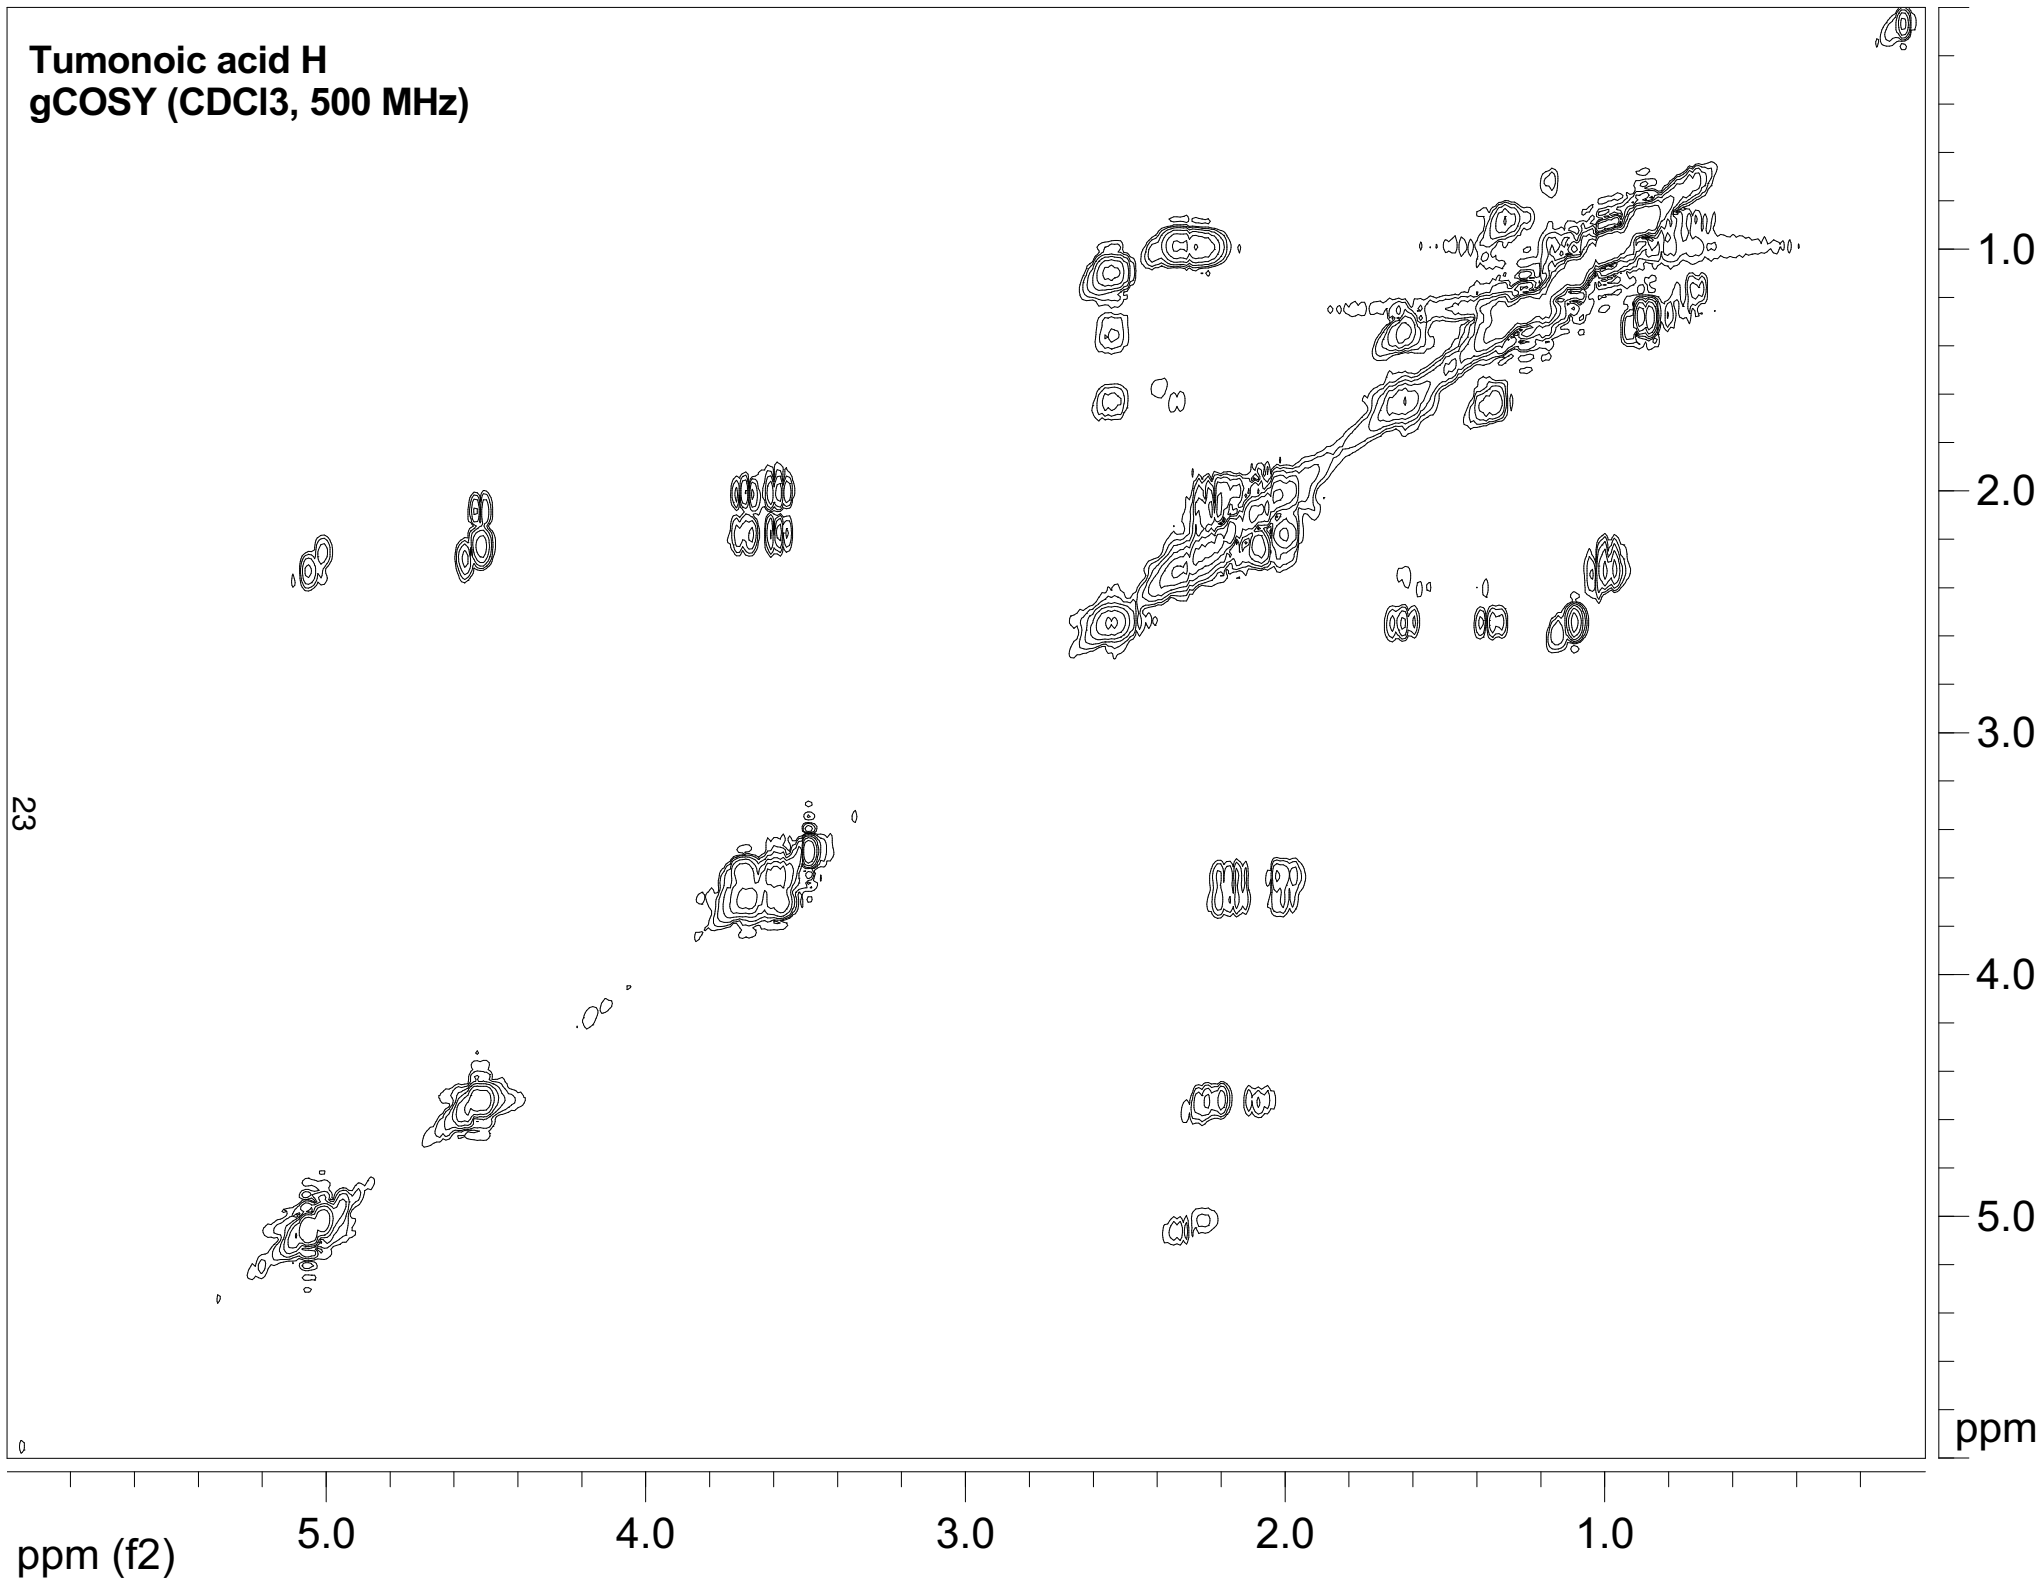

**Tumonoic acid H**  
**gHSQC (CDCl<sub>3</sub>, 500 MHz)**

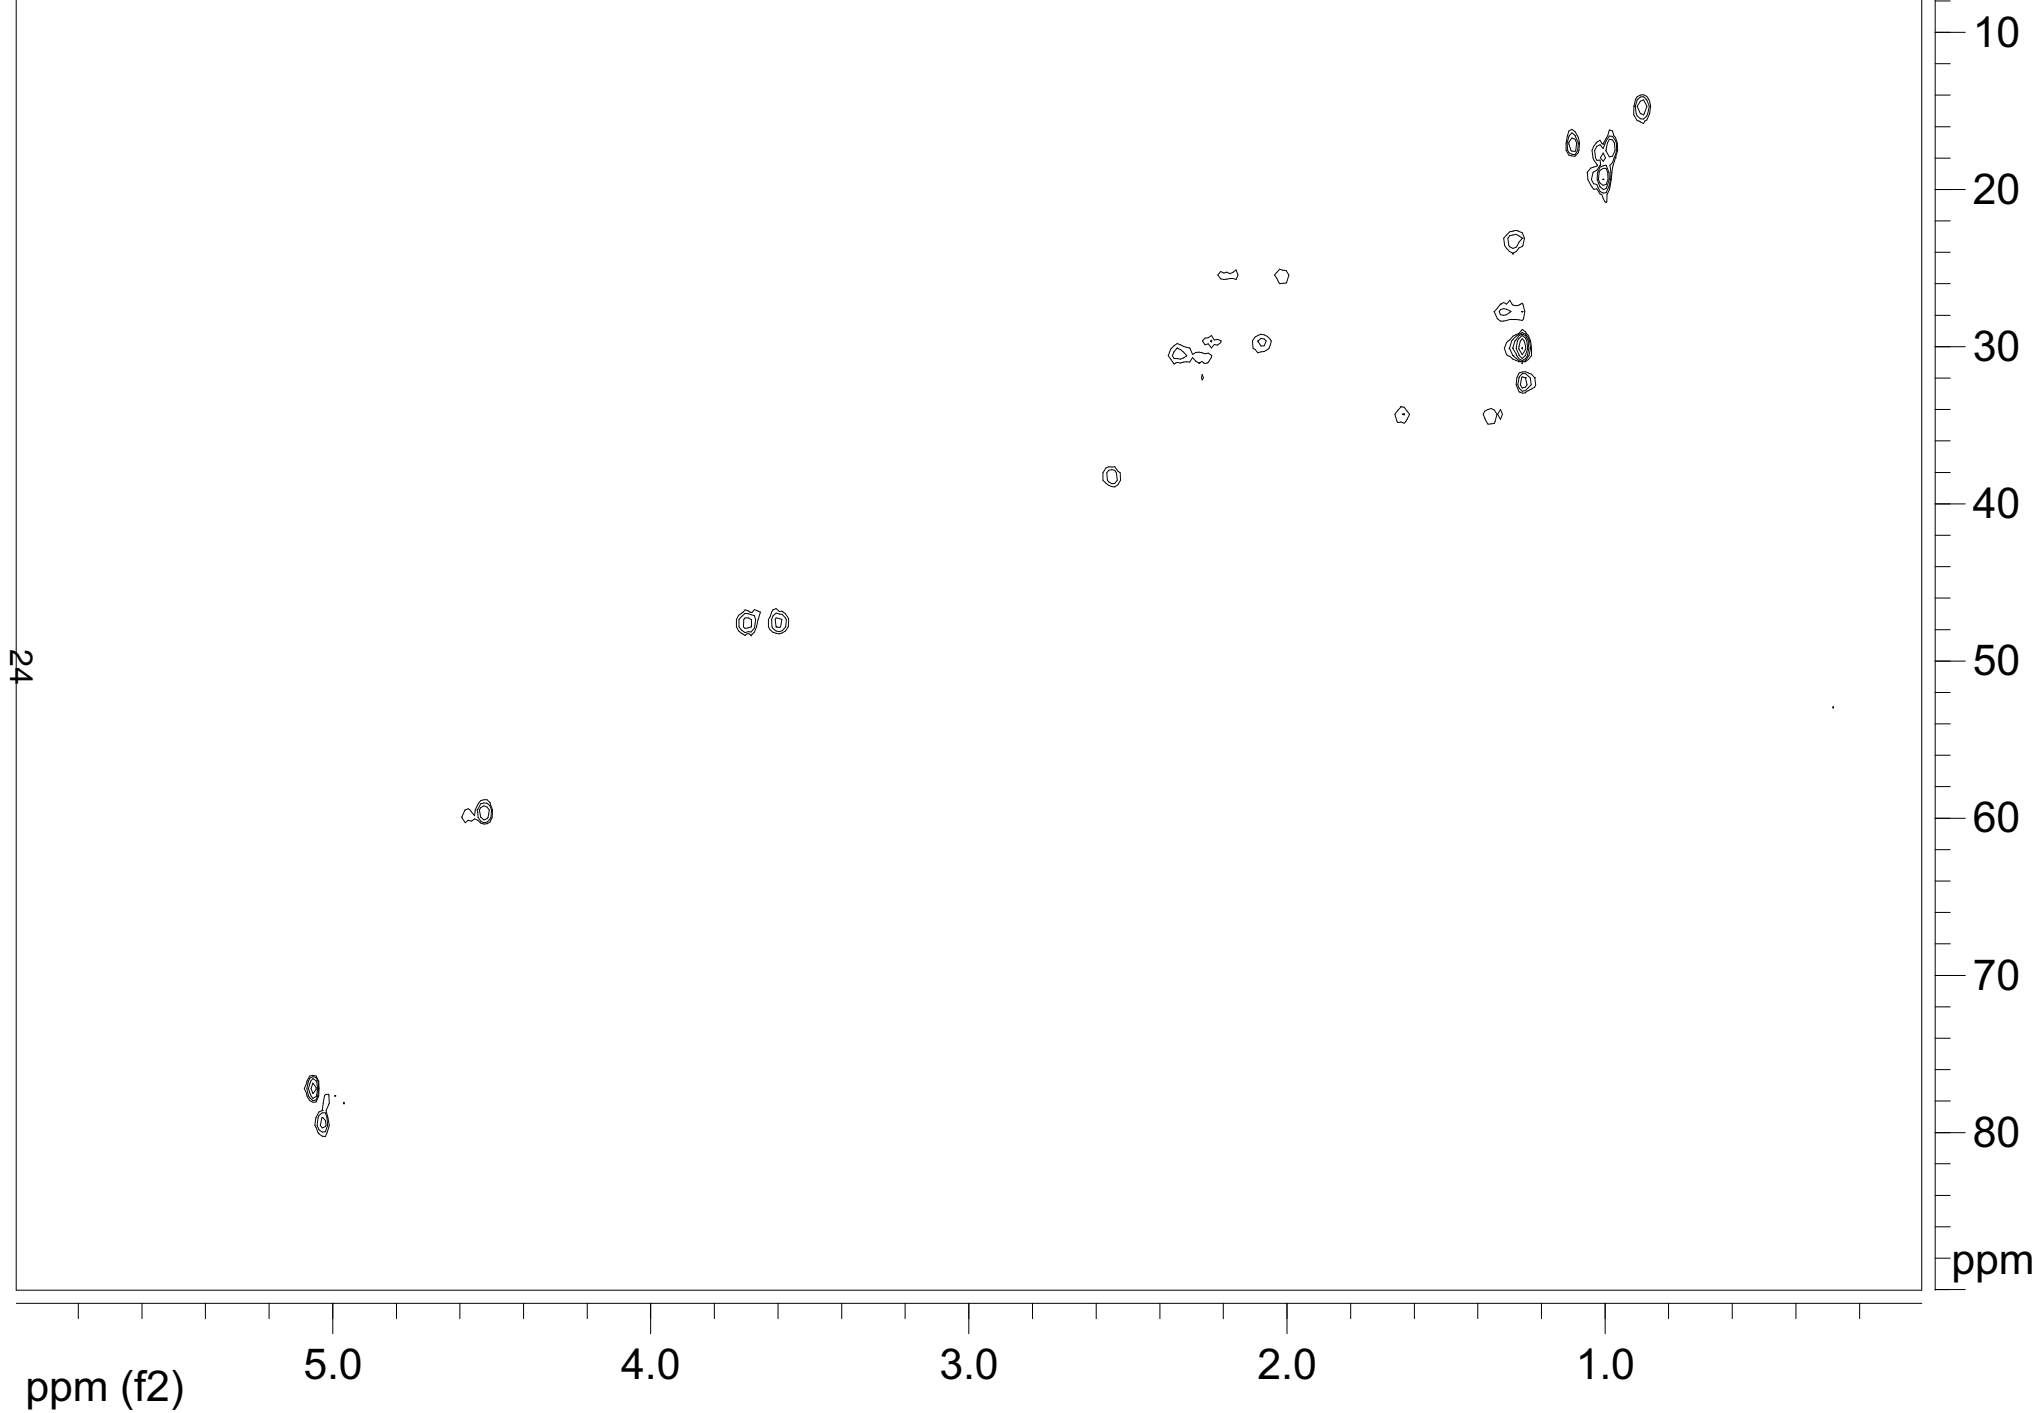

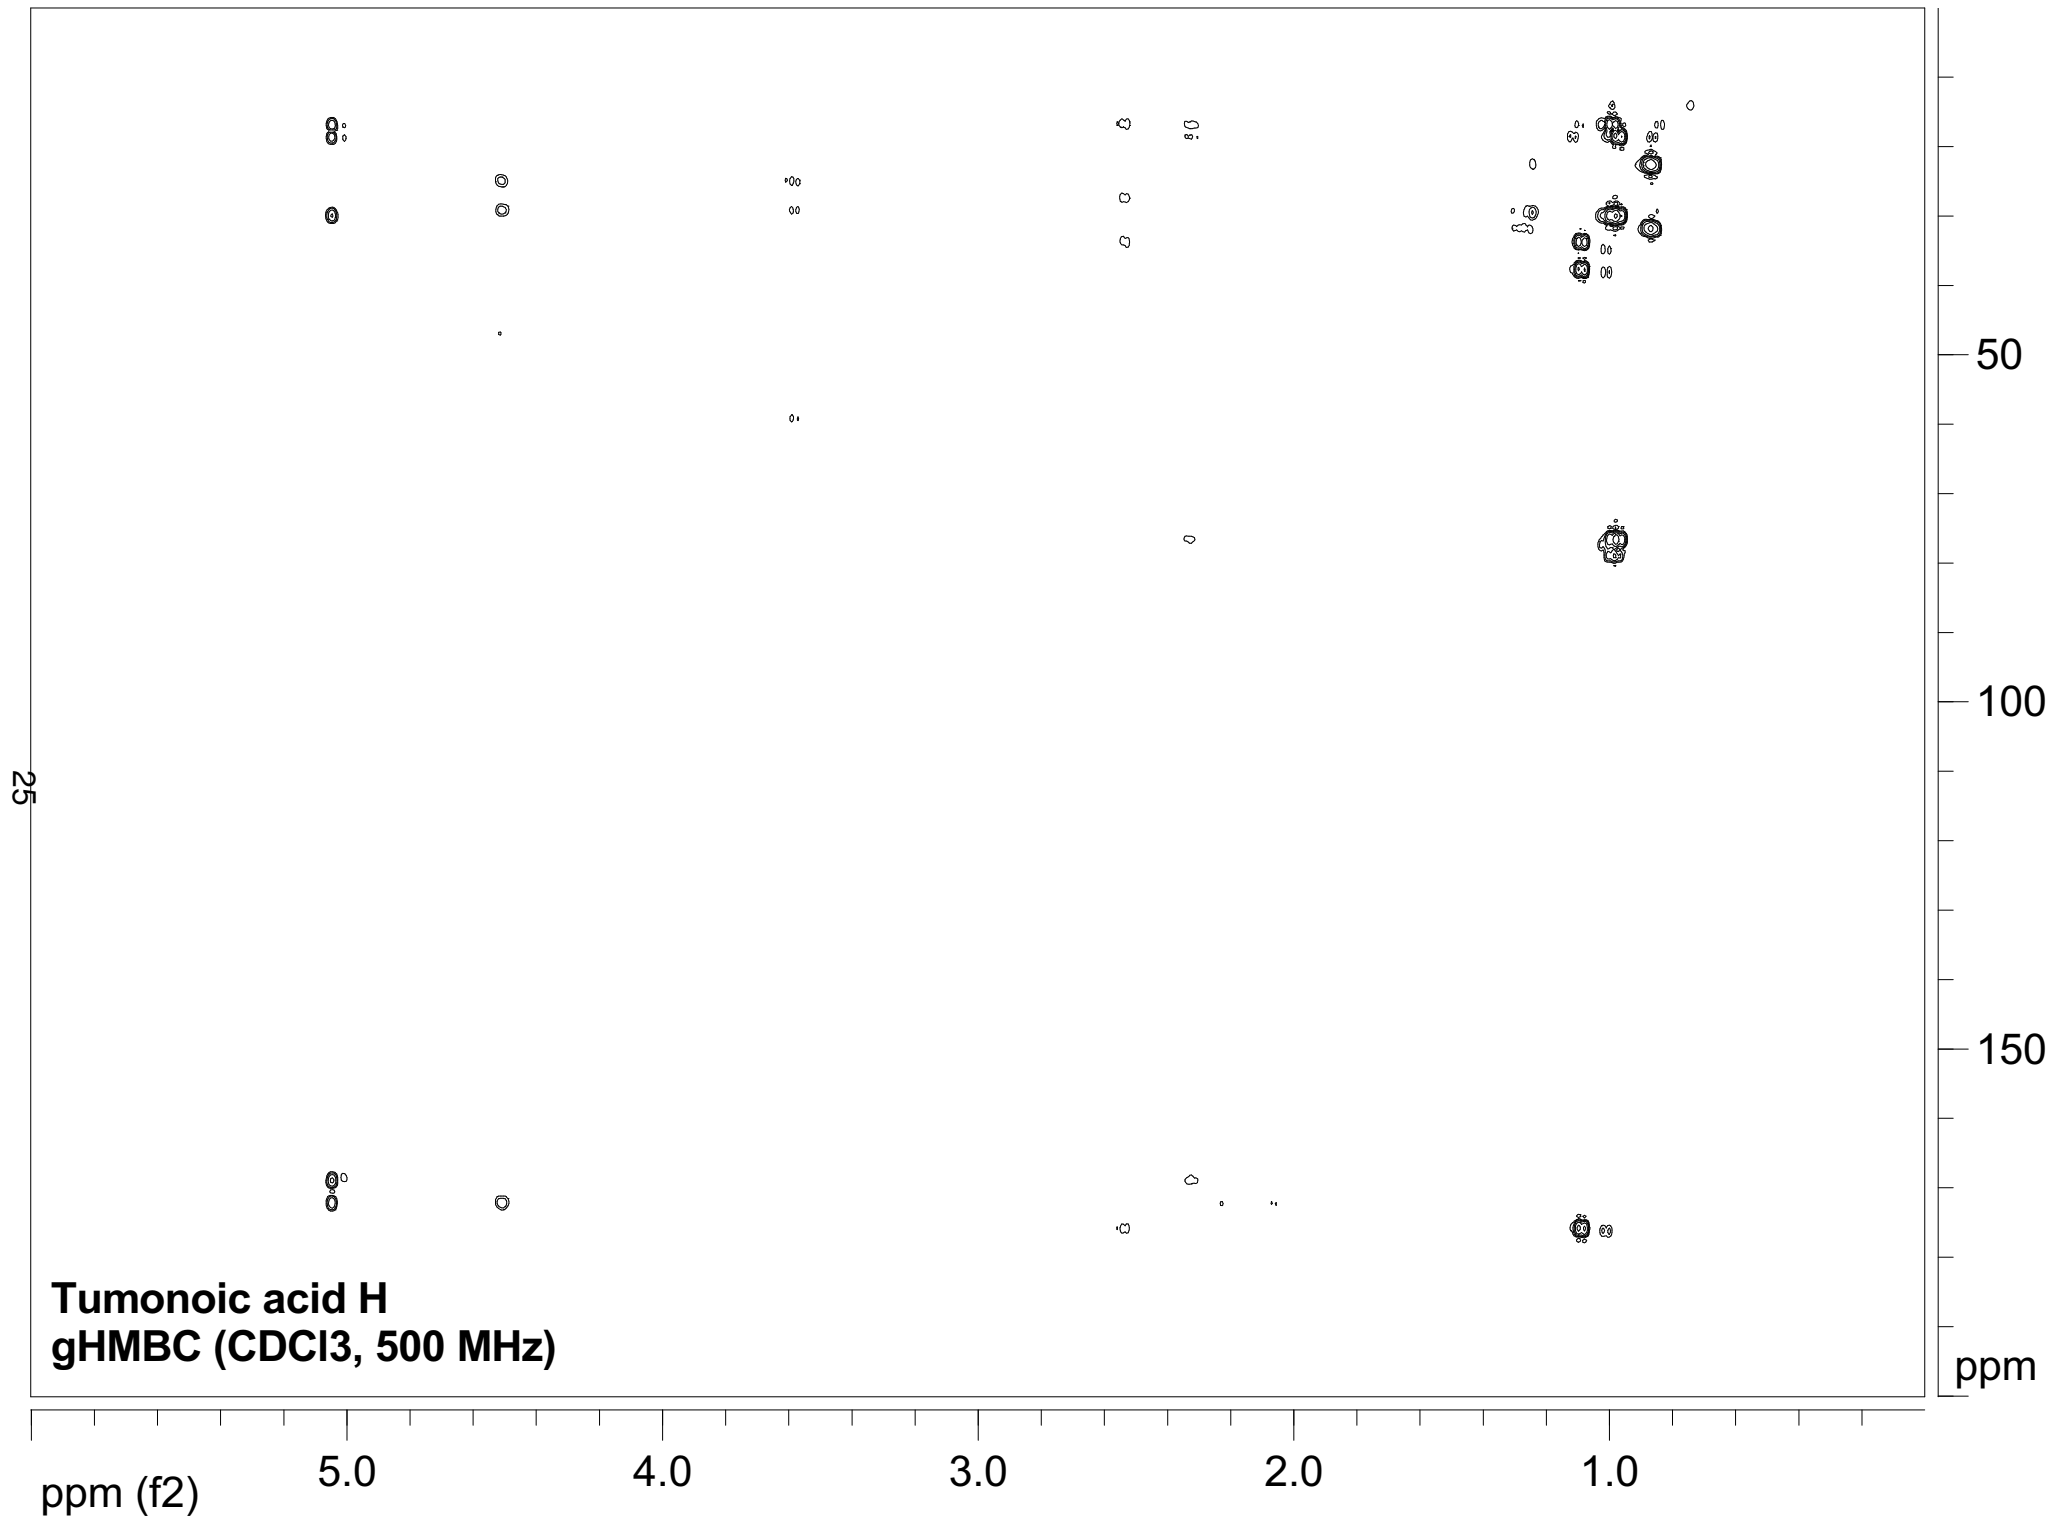

**Tumonoic acid I**  
**<sup>1</sup>H NMR (CDCl<sub>3</sub>, 300 MHz)**

acetone

26

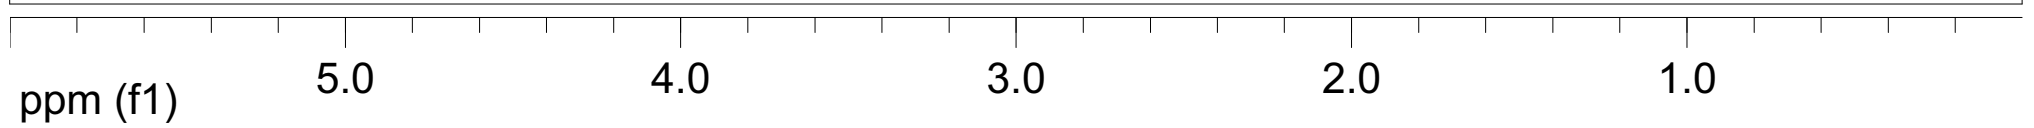

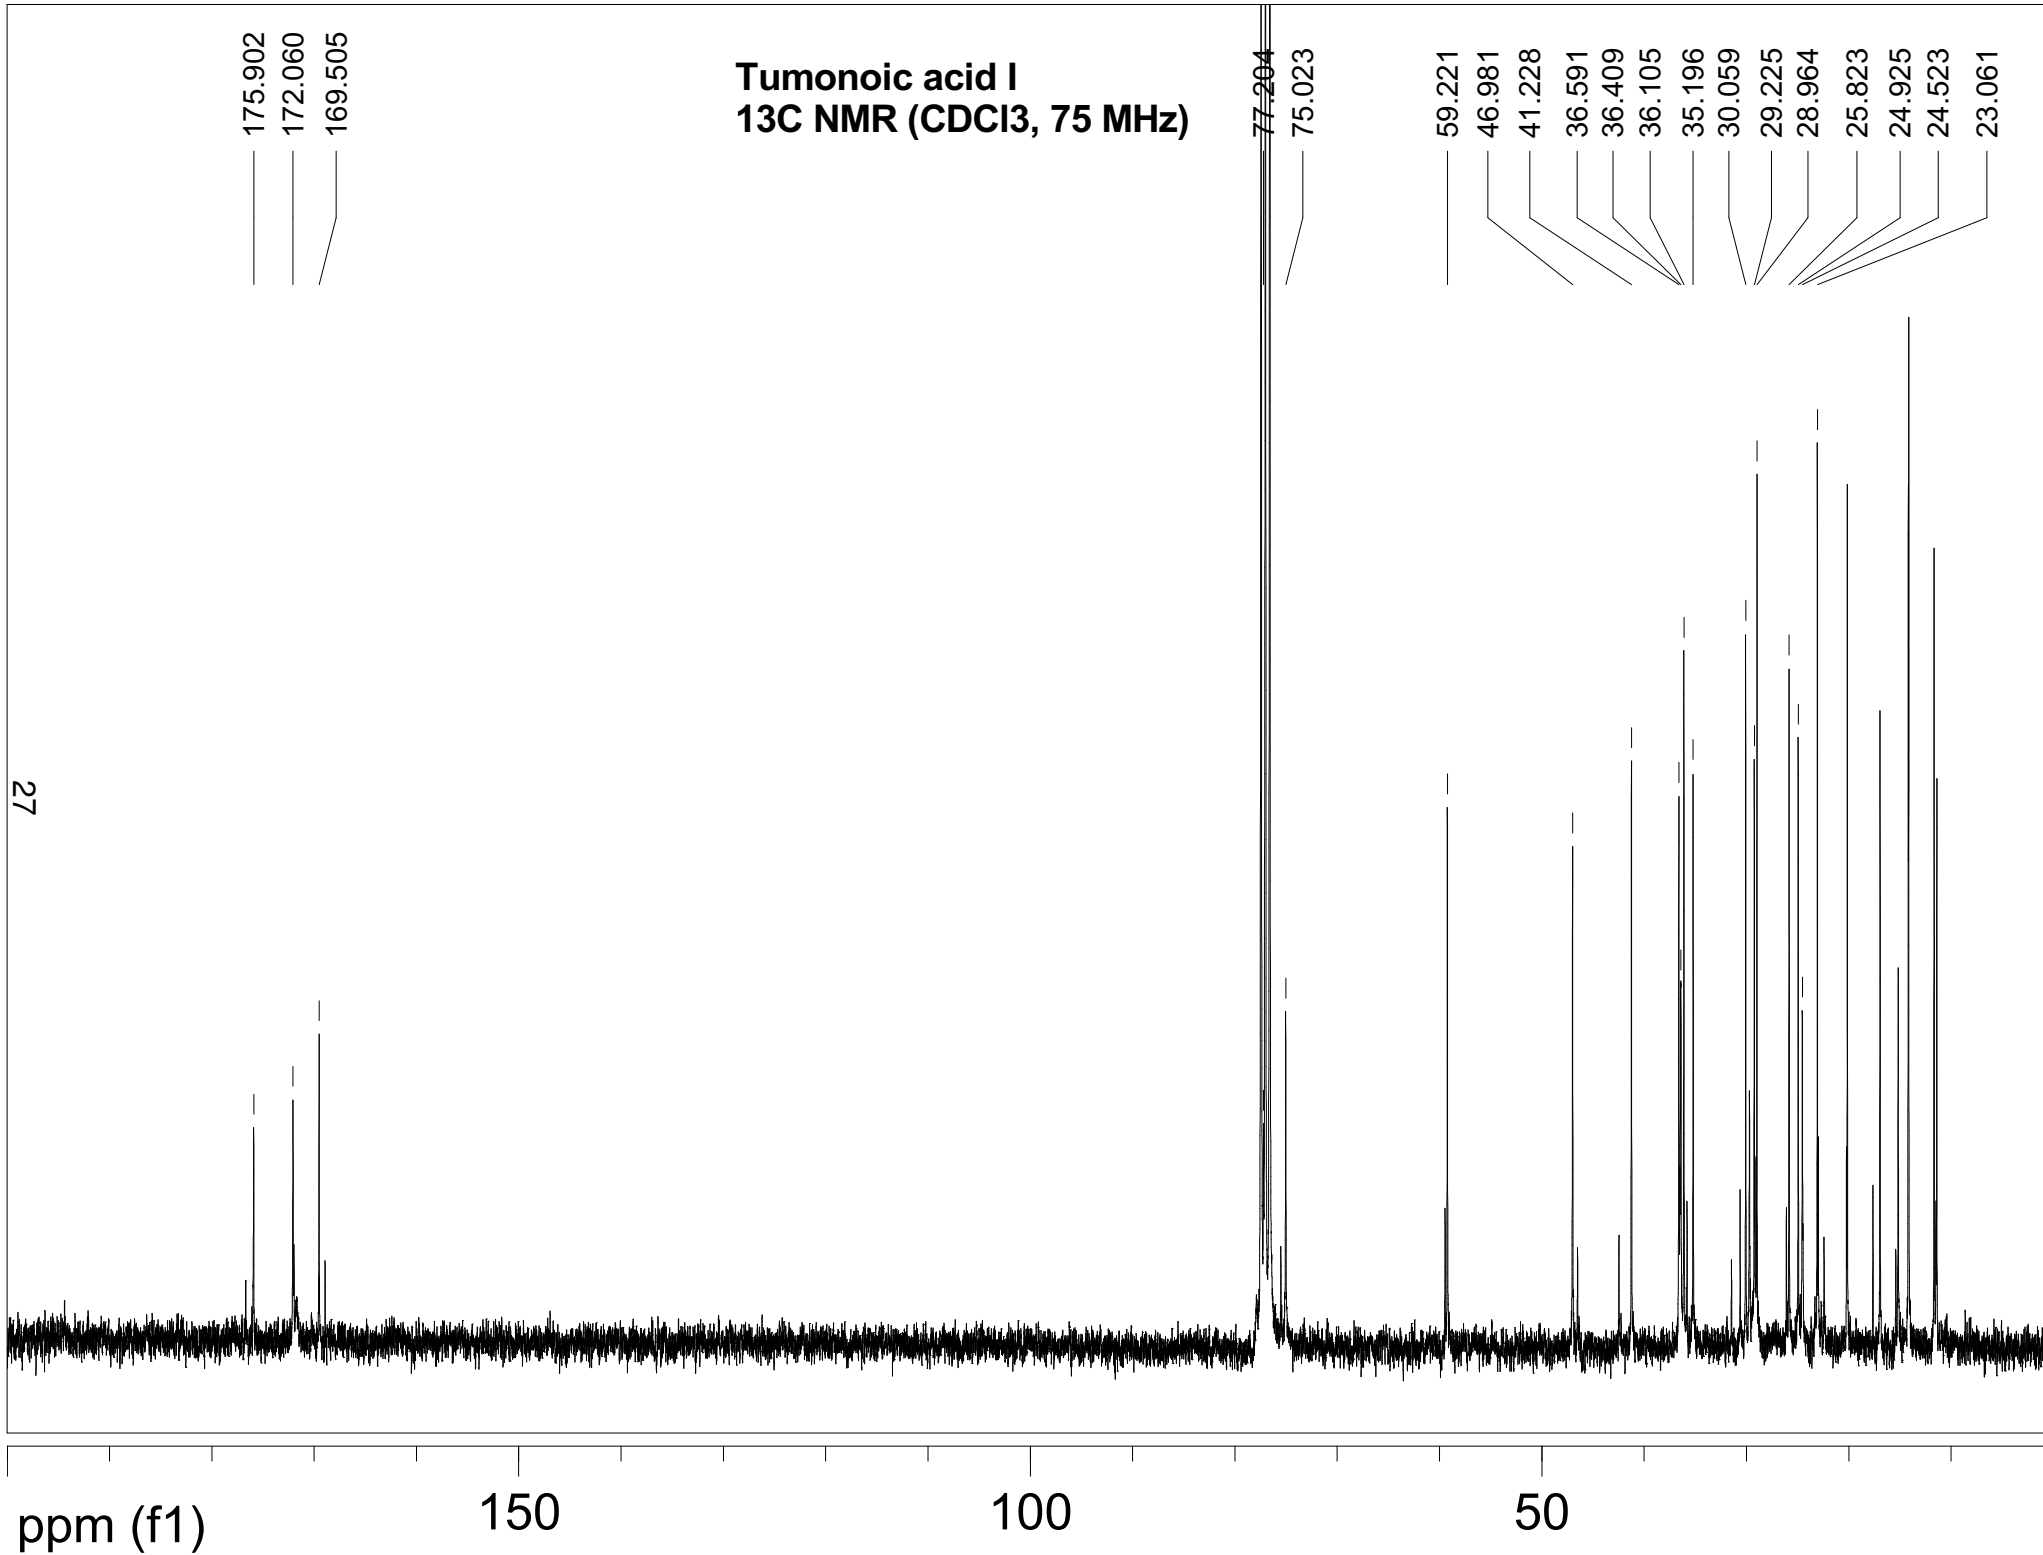

**Tumonoic acid I**  
**gCOSY (CDCl<sub>3</sub>, 500 MHz)**

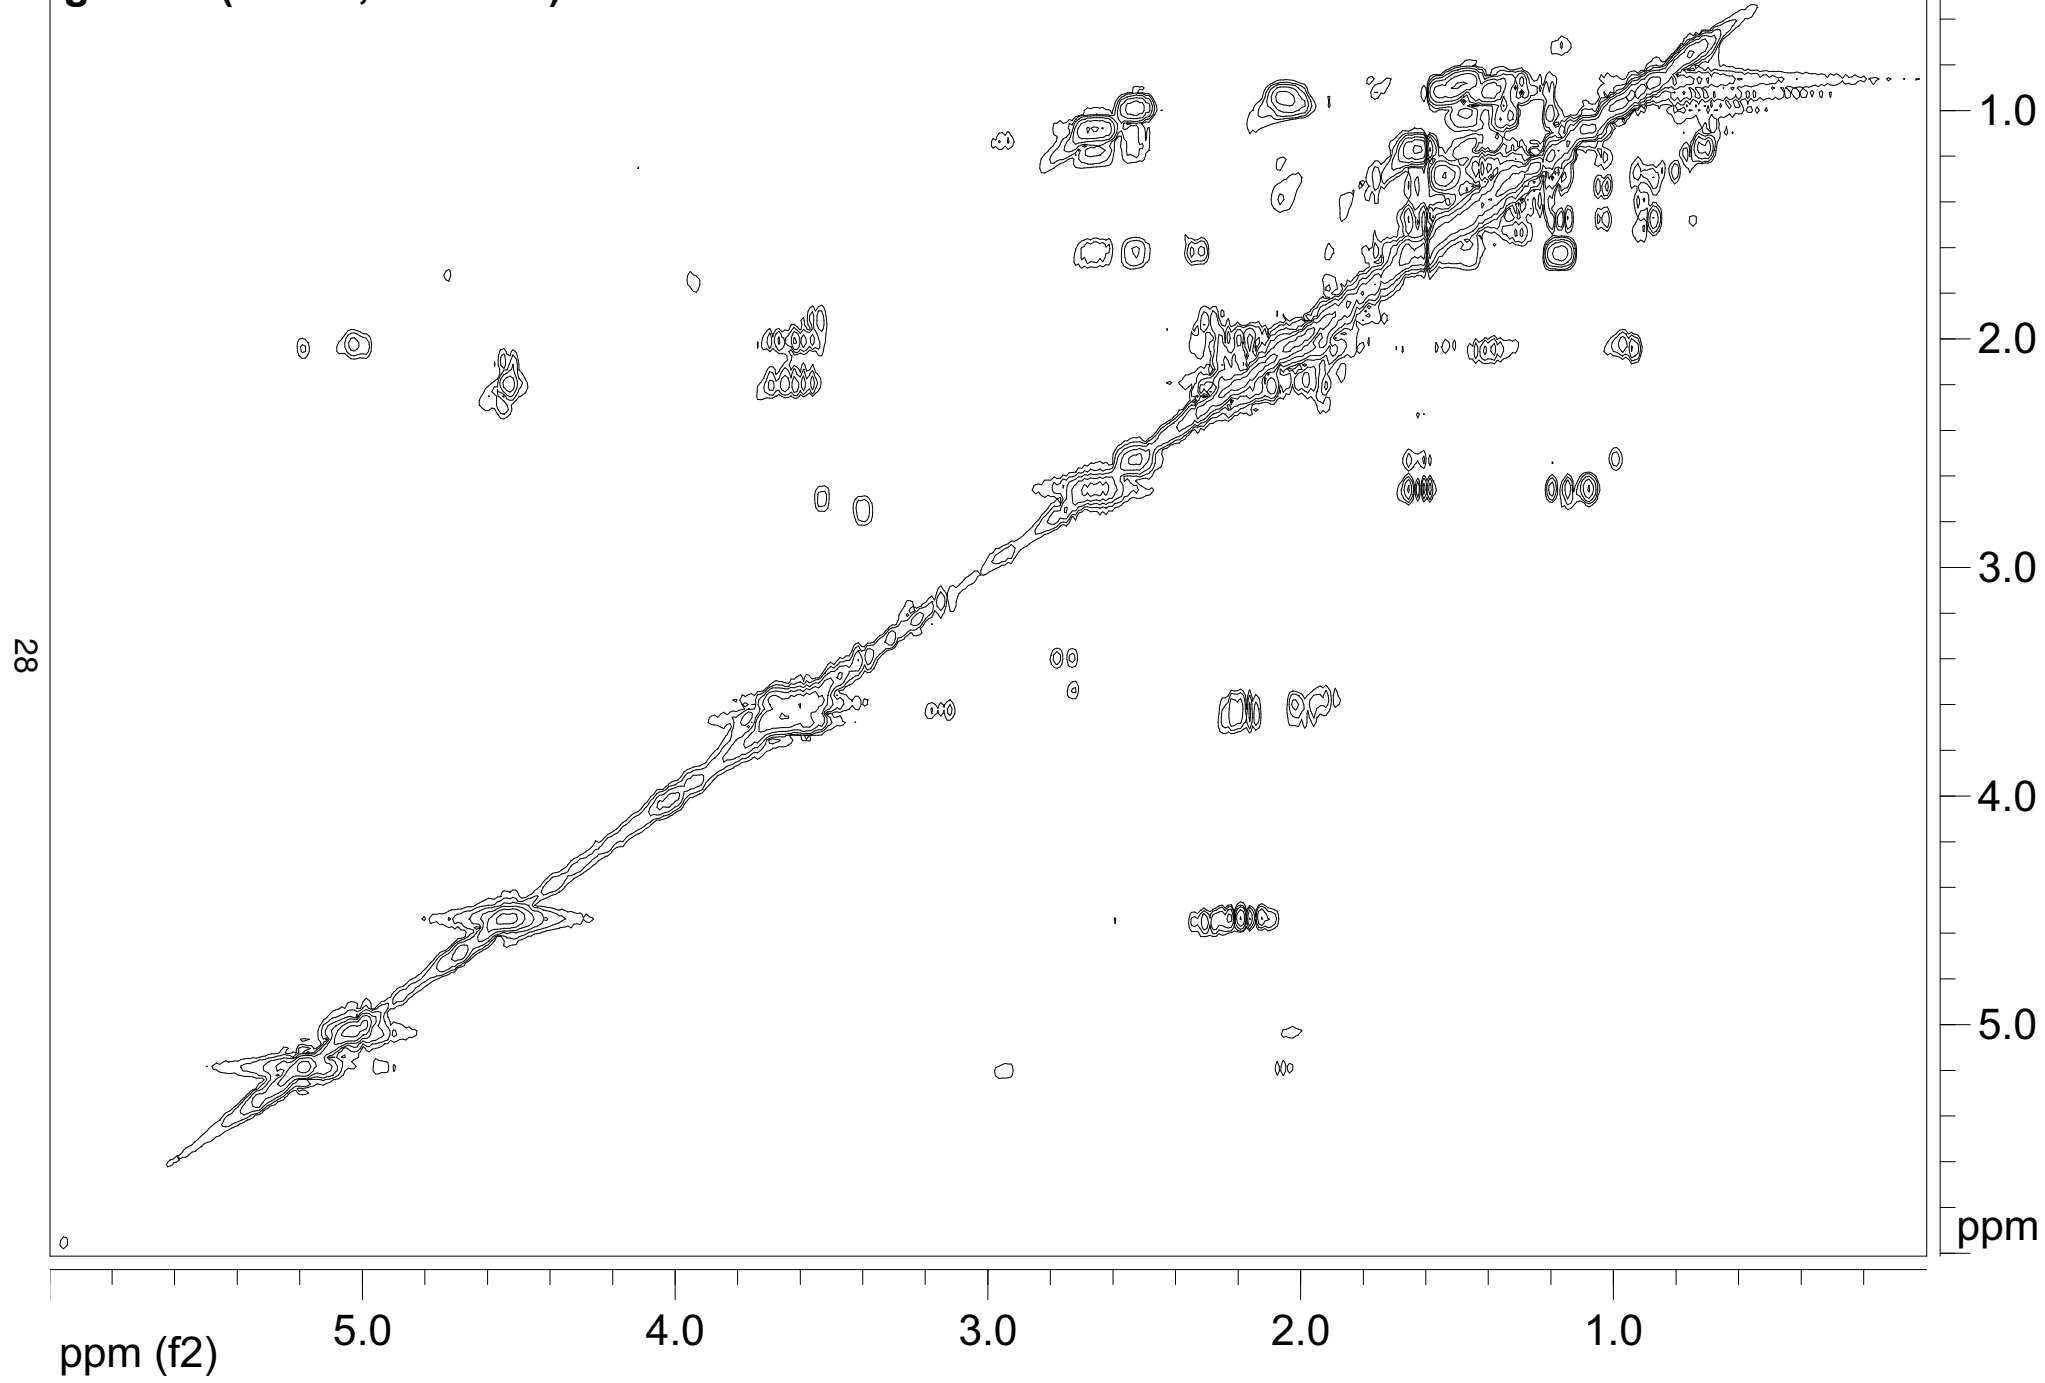

**Tumonoic acid I**  
**gHSQC (CDCl<sub>3</sub>, 500 MHz)**

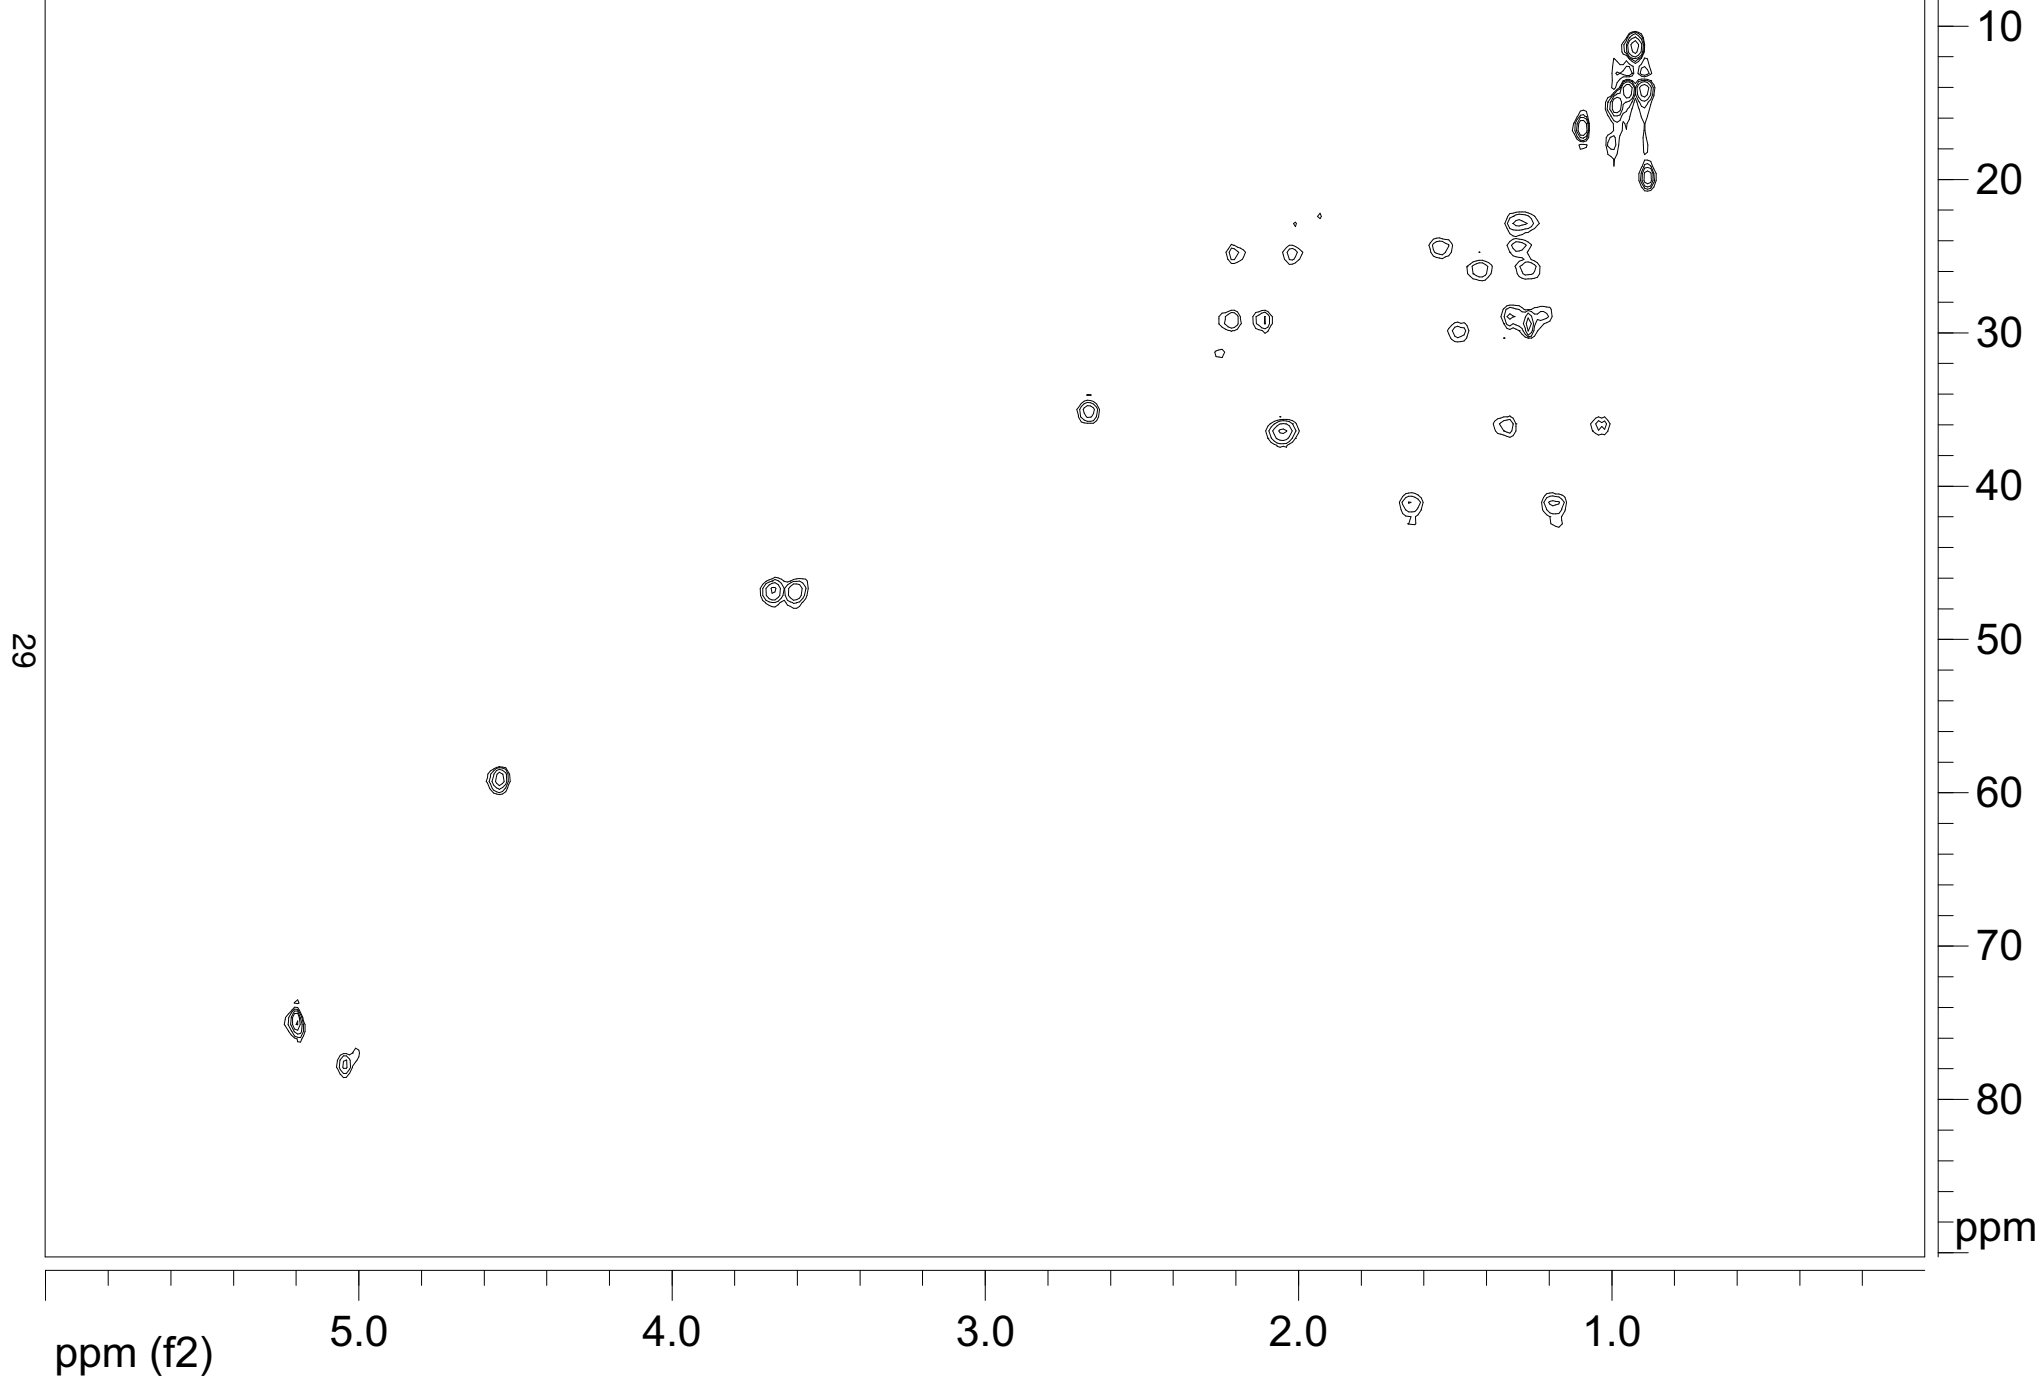

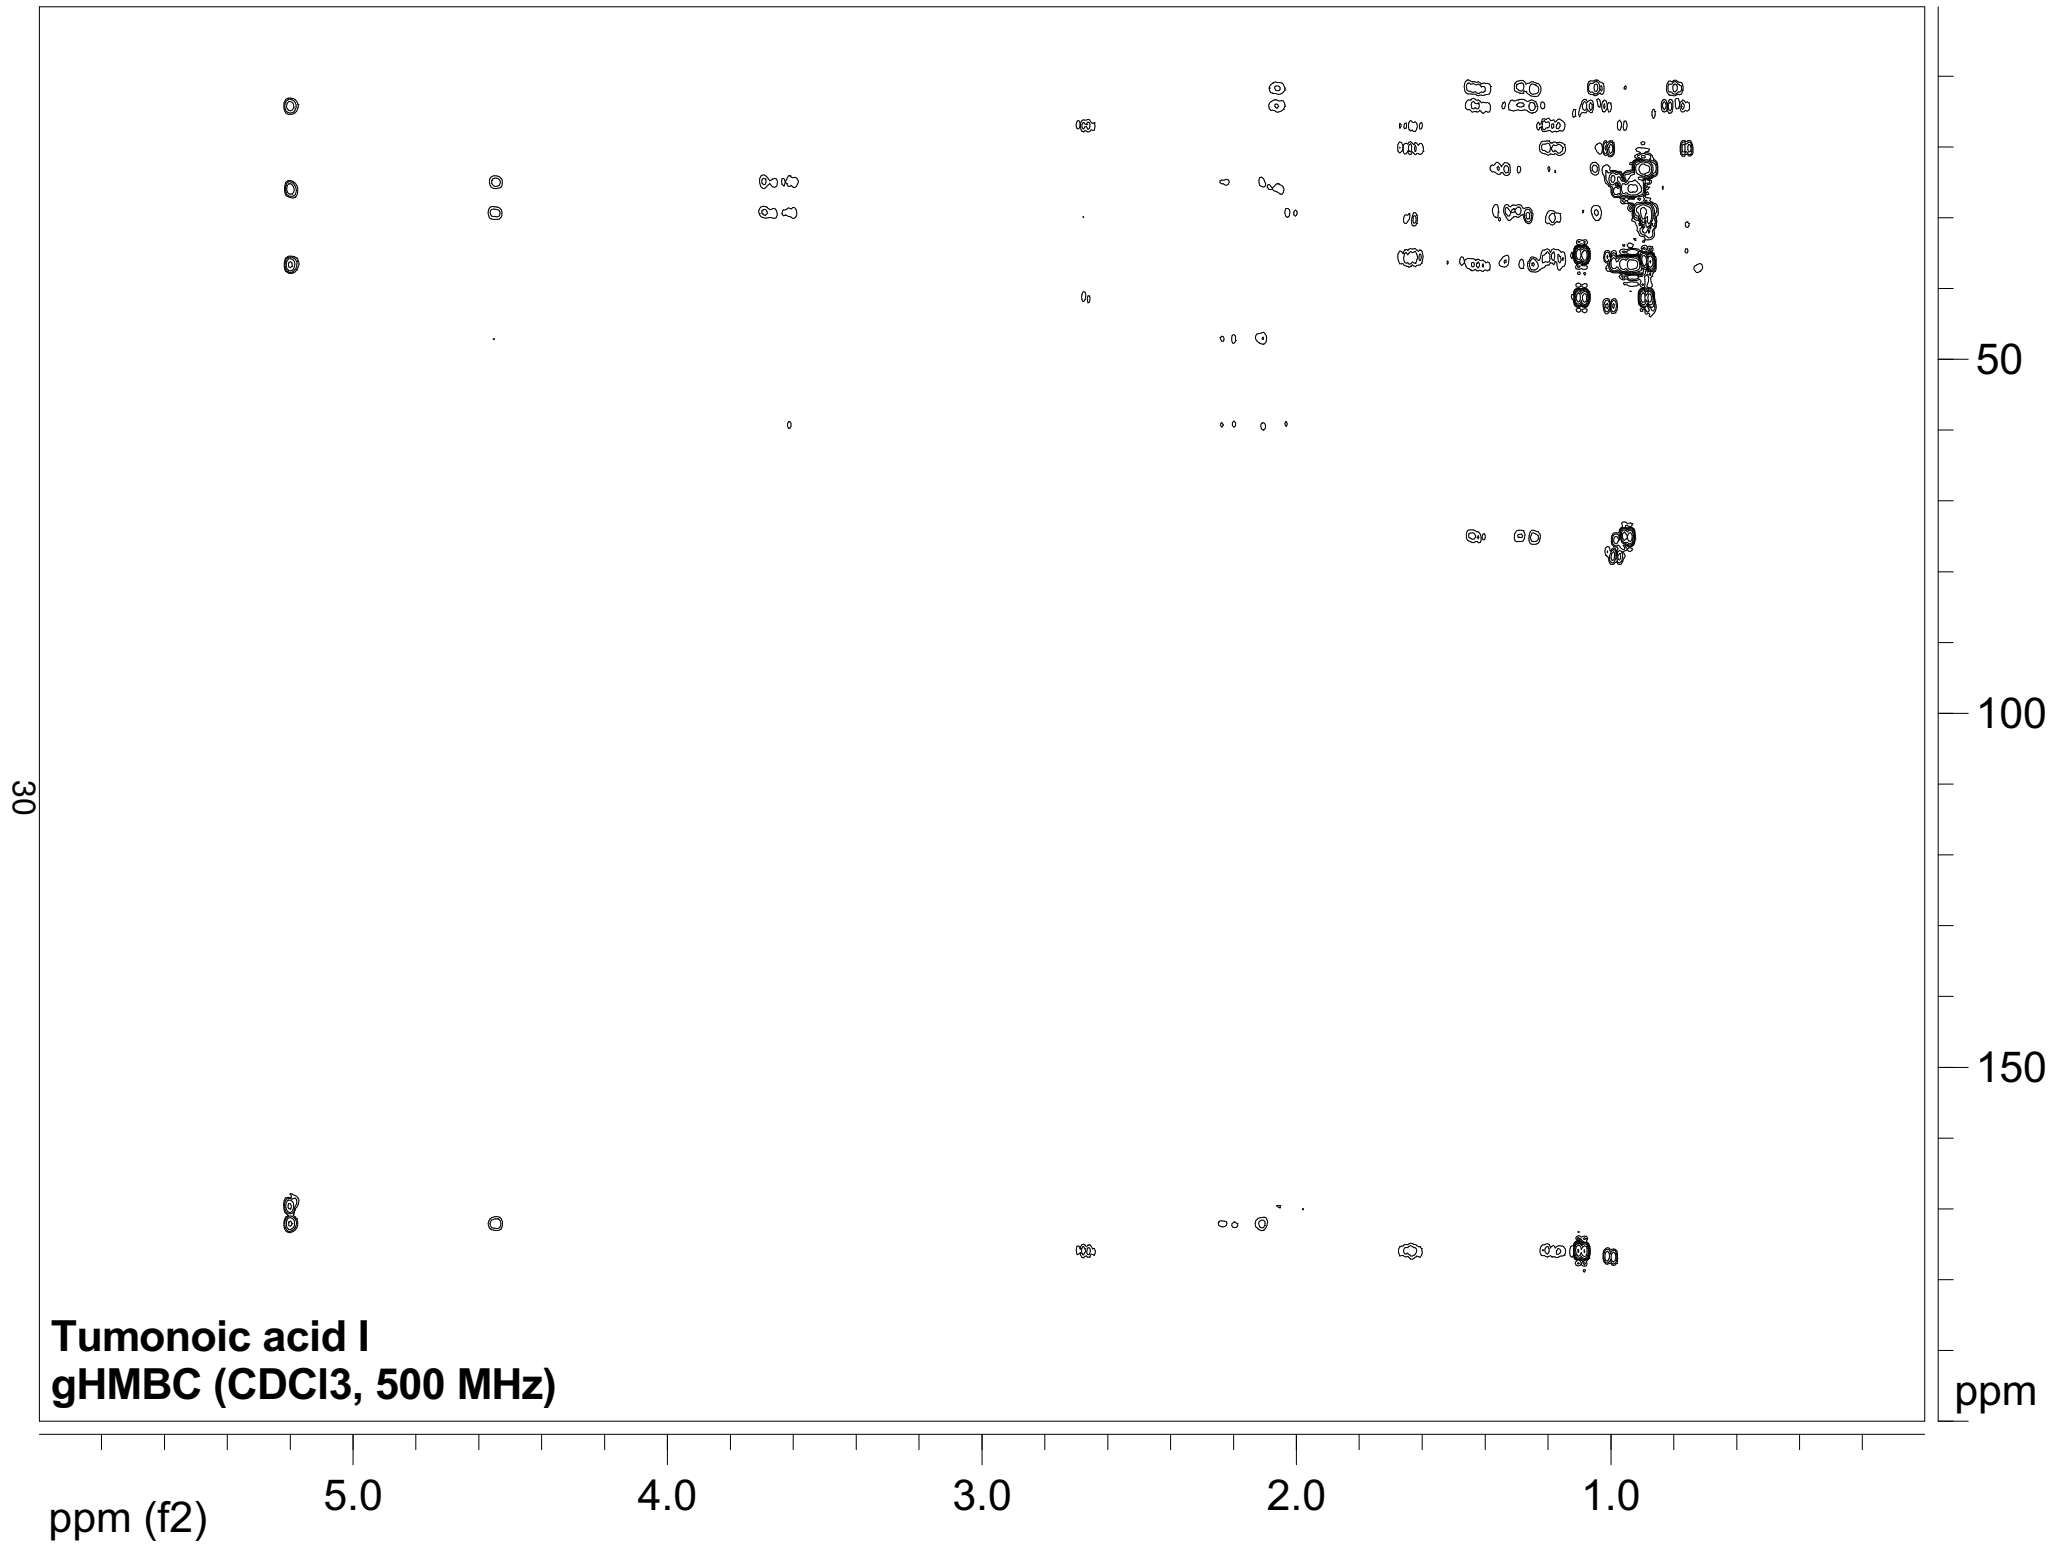



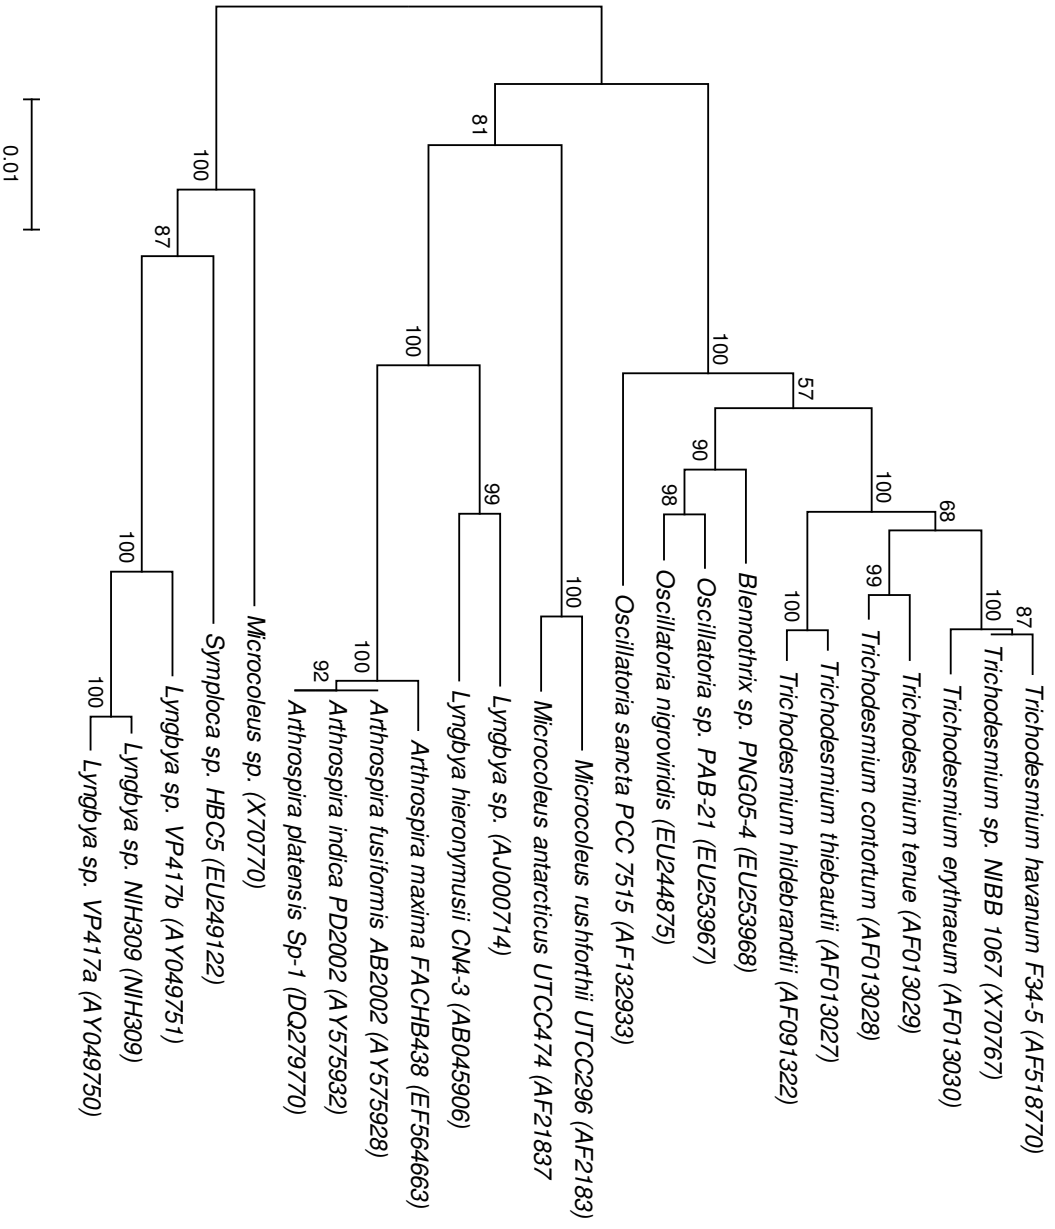

(ML)-phylogenetic tree including the full 1,414 nucleotide sequence

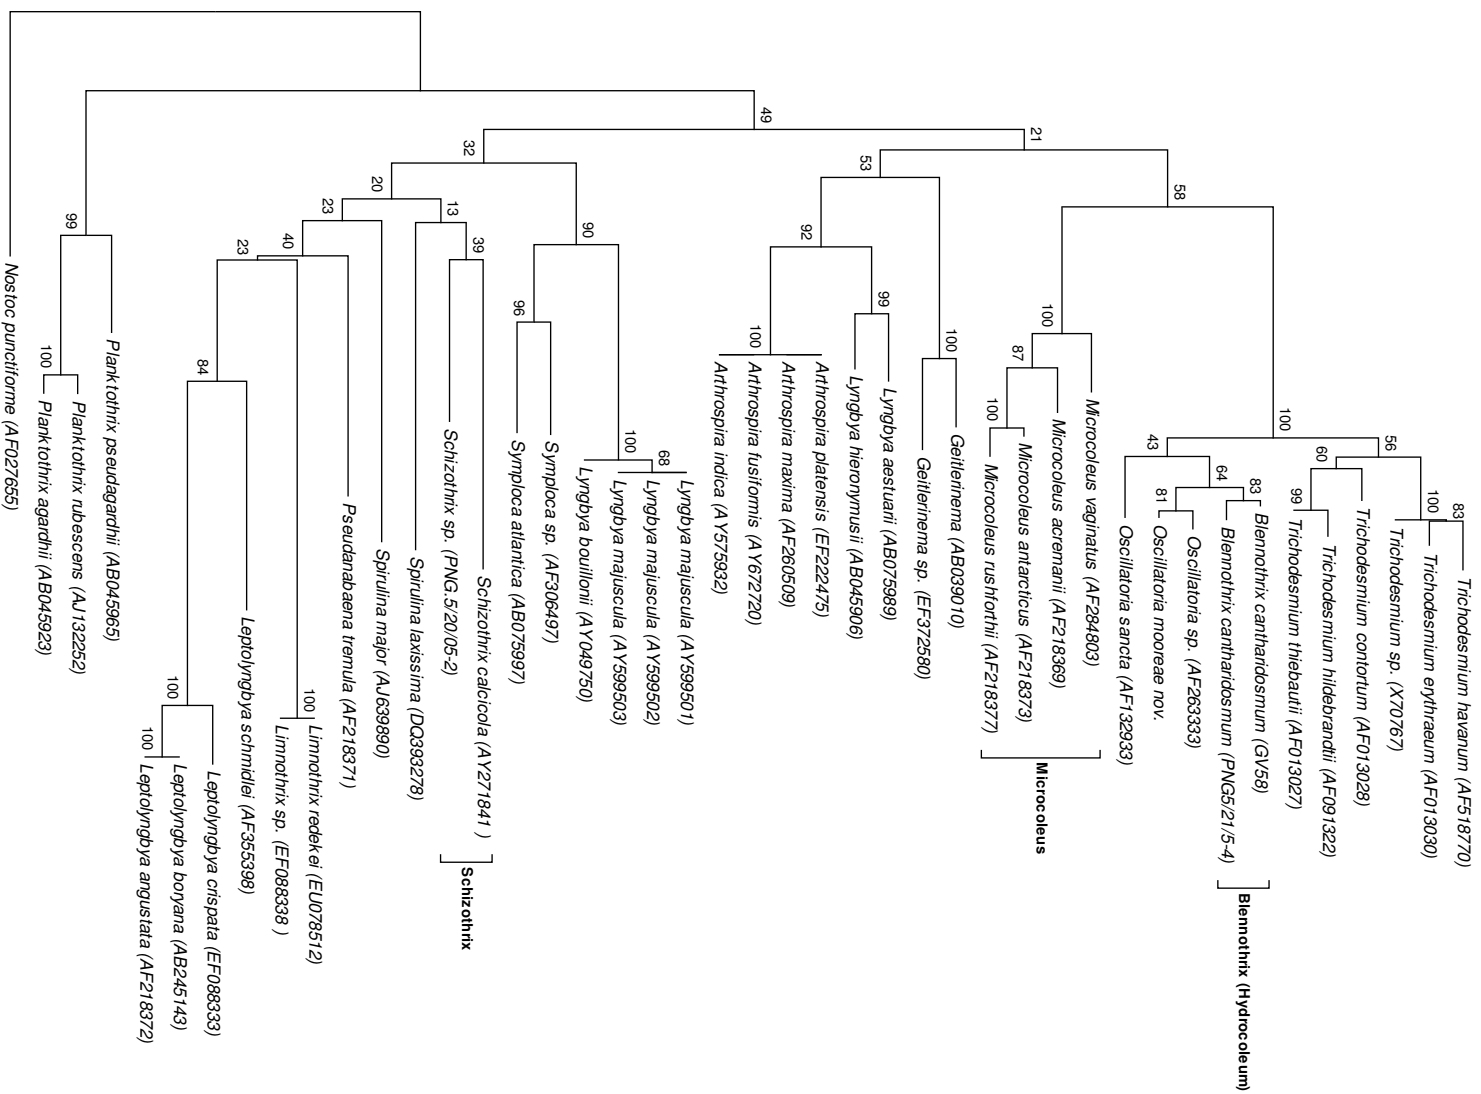

(ML)-phylogenetic tree composed of partial 599 nucleotide sequence
